# Supplementary material for: Estimation of maize LCC and FVC for full growth periods based on UAV remote sensing and ensemble learning
Source: PeerJ journal article supplement (doi:10.7717/peerj-cs.3356), 2025-11-04
Supplement: fvc_vi.xlsx [file fvc_vi.xlsx]

## Sheet: Sheet1
0.814556	0.582159	0.323799	0.259368	0.700357	0.354508
0.82448	0.572806	0.325481	0.263182	0.681893	0.351873
0.811753	0.559785	0.301662	0.250014	0.69264	0.353341
0.86534	0.543663	0.297981	0.252024	0.673495	0.354946
0.841183	0.545854	0.296008	0.24762	0.660869	0.346487
0.832203	0.545846	0.294211	0.247774	0.668382	0.352492
0.710616	0.53872	0.299087	0.248232	0.649777	0.346736
0.619017	0.544046	0.297692	0.248767	0.660704	0.345187
0.550671	0.516688	0.283969	0.247062	0.633395	0.341684
0.777983	0.546967	0.297514	0.25122	0.673949	0.351047
0.589344	0.53796	0.293246	0.248852	0.659833	0.347545
0.655272	0.557677	0.303056	0.25152	0.671886	0.352231
0.70477	0.535734	0.297625	0.250052	0.651469	0.347693
0.816401	0.547999	0.309025	0.258073	0.663556	0.344104
0.66546	0.579336	0.318523	0.254596	0.701333	0.368612
0.681776	0.624647	0.344335	0.267193	0.75189	0.363206
0.79911	0.622364	0.33294	0.26694	0.762015	0.378183
0.80407	0.622417	0.337365	0.264556	0.756702	0.373821
0.789864	0.603811	0.335256	0.263894	0.727062	0.365499
0.738154	0.615724	0.333391	0.259744	0.741994	0.35951
0.61132	0.551825	0.303052	0.254891	0.680945	0.362016
0.798103	0.602673	0.326381	0.257852	0.734557	0.358584
0.827093	0.606397	0.324037	0.256494	0.733804	0.362453
0.745893	0.590534	0.319661	0.254381	0.71021	0.358535
0.678578	0.58084	0.310084	0.252287	0.699917	0.353076
0.736842	0.593683	0.326531	0.259592	0.712864	0.360766
0.768922	0.60222	0.319703	0.256823	0.736234	0.364924
0.619017	0.58627	0.314171	0.254475	0.709806	0.35971
0.710616	0.571344	0.30506	0.249129	0.691775	0.358234
0.812692	0.59274	0.317722	0.257978	0.721354	0.360529
0.764254	0.557	0.306014	0.248852	0.678474	0.365809
0.796074	0.601359	0.314006	0.254261	0.739099	0.373984
0.773498	0.594993	0.318892	0.257311	0.72823	0.358386
0.771221	0.583077	0.316713	0.255158	0.708143	0.36872
0.738154	0.570907	0.299965	0.246692	0.704486	0.351486
0.591392	0.548982	0.297366	0.24765	0.667874	0.351913
0.726102	0.569701	0.306696	0.253051	0.695871	0.347131
0.80602	0.624929	0.328731	0.256877	0.763925	0.368659
0.710616	0.552184	0.298931	0.255004	0.681357	0.352718
0.784544	0.586688	0.302171	0.249067	0.725716	0.363064
0.783464	0.591811	0.315142	0.256389	0.721055	0.365827
0.742053	0.595843	0.31835	0.255642	0.734213	0.360787
0.67372	0.580125	0.314084	0.256529	0.702295	0.36253
0.777983	0.568527	0.302917	0.250244	0.701345	0.3525
0.70329	0.57422	0.30262	0.251259	0.711325	0.363255
0.641204	0.578689	0.306788	0.248859	0.716845	0.376369
0.80602	0.626344	0.347095	0.264157	0.739413	0.388737
0.77687	0.639664	0.359608	0.273161	0.752881	0.401191
0.73018	0.629333	0.358645	0.273408	0.745583	0.392093
0.759492	0.619776	0.344383	0.263066	0.746464	0.391747
0.701803	0.593789	0.327842	0.25605	0.718694	0.375324
0.716346	0.61911	0.340768	0.260145	0.741721	0.3881
0.672085	0.59747	0.33569	0.257171	0.718388	0.381542
0.791955	0.625125	0.338153	0.258411	0.755249	0.394455
0.748421	0.604348	0.330155	0.255193	0.7278	0.390317
0.698806	0.592515	0.314133	0.251903	0.724162	0.385704
0.786688	0.621368	0.342927	0.264883	0.740597	0.38785
0.886392	0.652663	0.356946	0.26518	0.784072	0.401462
0.772362	0.591196	0.319715	0.253797	0.727055	0.385898
0.827093	0.612616	0.327051	0.2546	0.743771	0.39219
0.764254	0.58155	0.327007	0.255599	0.704826	0.391056
0.794025	0.594428	0.326466	0.253659	0.724127	0.38818
0.818228	0.689833	0.379013	0.279498	0.808212	0.419354
0.74076	0.686437	0.381154	0.282839	0.800251	0.408911
0.800112	0.664454	0.376079	0.279676	0.777841	0.398302
0.716346	0.671504	0.379967	0.281951	0.786387	0.394257
0.787752	0.68659	0.384233	0.281913	0.802624	0.413706
0.813626	0.701309	0.397314	0.293415	0.807178	0.424739
0.838782	0.689368	0.387061	0.286248	0.798235	0.421362
0.800112	0.709081	0.398784	0.289913	0.824992	0.4177
0.792992	0.659202	0.366028	0.27573	0.766725	0.402692
0.745893	0.672275	0.36967	0.275787	0.784299	0.401844
0.754633	0.685291	0.392094	0.292982	0.789836	0.408942
0.774627	0.683018	0.384496	0.283806	0.803671	0.407649
0.7666	0.668137	0.373017	0.281271	0.784266	0.404582
0.794025	0.667936	0.365833	0.276349	0.792128	0.410912
0.757074	0.626869	0.340136	0.263188	0.753057	0.398412
0.796074	0.669959	0.372341	0.274839	0.79093	0.409333
0.731526	0.672782	0.378174	0.284427	0.789296	0.396595
0.802101	0.650669	0.371626	0.285131	0.758647	0.386059
0.795052	0.648476	0.353379	0.266418	0.776944	0.399463
0.783464	0.642532	0.34524	0.264669	0.770729	0.399716
0.73018	0.640324	0.348648	0.264883	0.751783	0.389992
0.731526	0.658388	0.356215	0.267489	0.773982	0.40084
0.755857	0.628943	0.353476	0.270549	0.729191	0.387002
0.73018	0.669527	0.370376	0.274702	0.78573	0.402856
0.648308	0.573827	0.336357	0.264509	0.659936	0.377691
0.724729	0.605388	0.334876	0.258125	0.717929	0.393601
0.80407	0.648006	0.351819	0.267484	0.765942	0.398084
0.772362	0.641133	0.347034	0.26318	0.756669	0.391844
0.780192	0.63963	0.348898	0.263903	0.75319	0.396724
0.760691	0.617024	0.342366	0.26295	0.72433	0.392815
0.681776	0.623817	0.345283	0.267462	0.732922	0.391577
0.841183	0.672094	0.379147	0.280513	0.782766	0.41293
0.788811	0.696782	0.396465	0.292853	0.816376	0.408085
0.827955	0.700728	0.394219	0.288115	0.823285	0.421603
0.833873	0.698879	0.40297	0.294546	0.819025	0.412602
0.858436	0.697371	0.400596	0.292558	0.818408	0.414061
0.758286	0.681116	0.388063	0.288952	0.792558	0.397887
0.742053	0.650915	0.350188	0.269011	0.77601	0.402639
0.822716	0.678845	0.379913	0.279424	0.794751	0.405043
0.780192	0.69057	0.386176	0.283833	0.806155	0.395411
0.752167	0.655502	0.372008	0.280671	0.755519	0.389338
0.721963	0.657198	0.363622	0.273367	0.763698	0.393455
0.767764	0.661493	0.378251	0.284334	0.762691	0.403388
0.827093	0.681119	0.375314	0.27564	0.802565	0.408939
0.773498	0.649522	0.350264	0.264004	0.769537	0.399601
0.757074	0.634653	0.336991	0.259126	0.749443	0.393286
0.790912	0.65296	0.348784	0.261942	0.778062	0.399507
0.782379	0.62578	0.351819	0.265344	0.732911	0.399105
0.797091	0.66248	0.355667	0.26488	0.782937	0.405277
0.777983	0.658964	0.361485	0.270263	0.780265	0.396096
0.777983	0.645652	0.357201	0.268302	0.760826	0.393758
0.731526	0.64286	0.342845	0.259469	0.762362	0.398249
0.728827	0.621074	0.334564	0.258577	0.746857	0.365615
0.743339	0.628532	0.339655	0.260687	0.756858	0.372437
0.758286	0.69253	0.386648	0.28309	0.816049	0.400007
0.73946	0.630892	0.34221	0.263125	0.747698	0.391911
0.777983	0.658438	0.348567	0.259924	0.783774	0.405155
0.761885	0.673835	0.373931	0.276233	0.791485	0.405869
0.820934	0.682059	0.376735	0.274991	0.808086	0.418038
0.774627	0.646459	0.353908	0.265963	0.762637	0.399463
0.691181	0.635217	0.336069	0.25782	0.758808	0.396579
0.732865	0.621426	0.322844	0.252689	0.751786	0.399315
0.781288	0.639069	0.341388	0.257595	0.766069	0.404205
0.830517	0.676811	0.393015	0.290996	0.782314	0.390829
0.840386	0.691175	0.401515	0.296944	0.790764	0.407924
0.80795	0.663072	0.387834	0.287104	0.766425	0.405668
0.79911	0.677939	0.391388	0.287285	0.789769	0.412829
0.750925	0.652277	0.368516	0.275712	0.758542	0.401197
0.777983	0.676427	0.388086	0.284637	0.779503	0.41059
0.723349	0.65501	0.36753	0.272346	0.761575	0.394743
0.840386	0.686405	0.393026	0.28534	0.798424	0.416225
0.826226	0.675538	0.392102	0.288287	0.779329	0.413669
0.707707	0.641222	0.351711	0.262424	0.766204	0.384732
0.719168	0.639822	0.368644	0.275789	0.747458	0.354109
0.829667	0.686711	0.395851	0.288497	0.802301	0.390956
0.770075	0.659264	0.36826	0.273609	0.778278	0.392217
0.767764	0.667788	0.376134	0.280925	0.7836	0.404559
0.748421	0.636133	0.369985	0.279122	0.746524	0.391746
0.709165	0.666746	0.382758	0.286007	0.780652	0.404357
0.731526	0.739474	0.438836	0.317001	0.852437	0.43399
0.797091	0.739416	0.437085	0.317393	0.841595	0.412523
0.770075	0.712608	0.420315	0.309034	0.814544	0.411808
0.79911	0.730296	0.436932	0.318408	0.831963	0.420695
0.848928	0.732186	0.433486	0.315666	0.835544	0.438485
0.851177	0.738102	0.438737	0.320901	0.836633	0.434489
0.830517	0.727568	0.427217	0.312217	0.825875	0.427802
0.855576	0.743182	0.444371	0.322455	0.844347	0.432647
0.82448	0.719591	0.430851	0.316883	0.816171	0.407853
0.802101	0.721555	0.426729	0.312139	0.819912	0.408805
0.84741	0.742583	0.456567	0.335684	0.837232	0.410148
0.800112	0.724176	0.437418	0.32027	0.829508	0.411408
0.77687	0.723443	0.430067	0.315856	0.828304	0.415074
0.813626	0.71784	0.420292	0.310511	0.83067	0.421531
0.784544	0.680327	0.397185	0.294973	0.796215	0.405057
0.798103	0.721872	0.435892	0.320053	0.828393	0.418181
0.759492	0.7284	0.432322	0.314413	0.83995	0.420278
0.825355	0.713772	0.425857	0.316642	0.812473	0.402692
0.798103	0.680798	0.385868	0.285128	0.791987	0.410367
0.802101	0.694097	0.390976	0.285893	0.809408	0.414386
0.764254	0.697899	0.400582	0.294321	0.795456	0.404015
0.772362	0.701662	0.397996	0.290999	0.805284	0.4186
0.757074	0.68249	0.391311	0.290604	0.775125	0.396859
0.749676	0.704246	0.409183	0.299119	0.80919	0.419489
0.684942	0.639071	0.379804	0.287376	0.731234	0.386543
0.749676	0.679332	0.39071	0.288191	0.784865	0.396347
0.758286	0.69948	0.405878	0.297688	0.803129	0.396782
0.796074	0.698037	0.407192	0.29872	0.802116	0.394809
0.797091	0.69287	0.405005	0.29834	0.794519	0.402397
0.758286	0.665662	0.387227	0.28974	0.764574	0.396105
0.713495	0.680309	0.40364	0.301707	0.781273	0.398986
0.875693	0.728685	0.442127	0.325602	0.831409	0.423531
0.833873	0.749	0.456425	0.331078	0.859132	0.436633
0.852658	0.747402	0.447761	0.323877	0.856009	0.441985
0.864665	0.740588	0.452005	0.330891	0.843438	0.427475
0.895126	0.737396	0.444816	0.322279	0.847244	0.433074
0.781288	0.722256	0.432305	0.317488	0.817291	0.410758
0.768922	0.694455	0.391215	0.285868	0.807969	0.422377
0.788811	0.715293	0.413283	0.299085	0.826876	0.428779
0.79911	0.711279	0.411195	0.300265	0.821973	0.417867
0.764254	0.702039	0.421967	0.311234	0.79667	0.405447
0.768922	0.691955	0.403354	0.297012	0.790423	0.414878
0.716346	0.687475	0.414529	0.305933	0.793157	0.417051
0.816401	0.701333	0.410007	0.30601	0.814744	0.426771
0.796074	0.668052	0.375253	0.288034	0.781141	0.413855
0.780192	0.660004	0.364189	0.276314	0.765825	0.409925
0.7666	0.69276	0.393645	0.291443	0.80427	0.417133
0.784544	0.659276	0.384031	0.289499	0.769822	0.399946
0.822716	0.67787	0.38617	0.281976	0.795584	0.413673
0.82448	0.67644	0.384294	0.284151	0.78897	0.412297
0.768922	0.656019	0.367895	0.276256	0.757297	0.401489
0.74716	0.681484	0.380184	0.276856	0.793207	0.419389
0.726102	0.670589	0.367655	0.272266	0.780271	0.408006
0.76543	0.678156	0.37258	0.274452	0.792024	0.418171
0.780192	0.724763	0.419322	0.303246	0.835114	0.433403
0.763072	0.673777	0.378758	0.282347	0.782791	0.40994
0.796074	0.676354	0.37481	0.27862	0.787666	0.421942
0.777983	0.707856	0.410445	0.297999	0.81594	0.422822
0.800112	0.717239	0.417968	0.302547	0.831428	0.421525
0.788811	0.686763	0.393044	0.291127	0.789612	0.431069
0.755857	0.643699	0.351992	0.268817	0.762059	0.422677
0.801109	0.653332	0.368734	0.280114	0.777503	0.409206
0.808908	0.679408	0.408808	0.308093	0.773383	0.378819
0.841975	0.686092	0.414901	0.31436	0.776137	0.374626
0.81548	0.65934	0.399238	0.306355	0.751172	0.361691
0.888641	0.67673	0.404371	0.307919	0.773708	0.37382
0.812692	0.665508	0.396152	0.303604	0.762154	0.360644
0.860543	0.689931	0.405016	0.308071	0.779714	0.363605
0.709165	0.678444	0.3983	0.29964	0.77918	0.368156
0.895126	0.688687	0.410184	0.30825	0.79266	0.37969
0.857726	0.677234	0.412479	0.312148	0.77526	0.37283
0.856296	0.664292	0.38808	0.29356	0.76645	0.375947
0.771221	0.675787	0.405578	0.309736	0.761506	0.354638
0.889197	0.701422	0.420004	0.314074	0.804073	0.382478
0.786688	0.680066	0.404354	0.303513	0.785057	0.365831
0.817316	0.679769	0.404798	0.302333	0.78326	0.369528
0.822716	0.671045	0.413005	0.312698	0.76635	0.364421
0.810809	0.696373	0.422283	0.317154	0.792043	0.378743
0.827093	0.718333	0.433132	0.324331	0.81251	0.38528
0.876313	0.729958	0.444857	0.334213	0.818034	0.375031
0.857013	0.727611	0.451121	0.338057	0.817844	0.380753
0.903672	0.733584	0.462211	0.34731	0.822259	0.365759
0.913706	0.722665	0.441859	0.330621	0.815568	0.38848
0.88525	0.730743	0.458978	0.344038	0.81576	0.388165
0.909282	0.73086	0.456286	0.341542	0.824775	0.386075
0.853393	0.735927	0.452072	0.336399	0.830913	0.390329
0.867345	0.714319	0.431374	0.32233	0.809495	0.378896
0.868006	0.720137	0.435185	0.32603	0.81519	0.377429
0.911963	0.731444	0.45424	0.341698	0.822664	0.38142
0.886392	0.73586	0.460805	0.343078	0.832814	0.38416
0.891391	0.730004	0.445234	0.331947	0.833702	0.381918
0.884097	0.726673	0.443851	0.331355	0.829089	0.388045
0.817316	0.700312	0.423853	0.319753	0.792484	0.361859
0.888641	0.720521	0.439321	0.328692	0.809323	0.38972
0.858436	0.724967	0.44612	0.333481	0.824699	0.38431
0.874444	0.715382	0.45444	0.346353	0.811161	0.374882
0.875693	0.705796	0.423515	0.318211	0.810047	0.377474
0.86534	0.708626	0.421418	0.316182	0.808586	0.375452
0.84741	0.716527	0.443483	0.333272	0.805266	0.369322
0.900241	0.708886	0.433042	0.325906	0.795975	0.370522
0.837974	0.712055	0.428745	0.321017	0.805206	0.364007
0.840386	0.727667	0.446207	0.333324	0.815305	0.380359
0.802101	0.6935	0.422557	0.320326	0.784084	0.356289
0.881163	0.702127	0.420823	0.315074	0.798702	0.373434
0.820934	0.713438	0.43267	0.322325	0.811198	0.379047
0.854124	0.701798	0.425591	0.317961	0.796525	0.373456
0.829667	0.708237	0.428763	0.320128	0.800242	0.370758
0.852658	0.699668	0.428594	0.323446	0.785503	0.368639
0.842763	0.724998	0.451492	0.341528	0.809988	0.384503
0.930052	0.729574	0.455943	0.343951	0.80795	0.415647
0.887522	0.737898	0.469374	0.353951	0.828946	0.37405
0.876313	0.727739	0.452903	0.340135	0.821456	0.384179
0.891933	0.737107	0.467048	0.351295	0.82551	0.380837
0.935106	0.725348	0.451599	0.335893	0.825932	0.408248
0.851177	0.720396	0.453211	0.340763	0.812131	0.36737
0.863986	0.706286	0.428935	0.32324	0.801461	0.374729
0.88525	0.707279	0.424762	0.316487	0.81211	0.389318
0.837974	0.70254	0.413372	0.308511	0.805368	0.381649
0.838782	0.696759	0.419936	0.313792	0.793084	0.372913
0.841183	0.681205	0.404546	0.303572	0.783587	0.376076
0.795052	0.683927	0.417657	0.315226	0.778304	0.37616
0.859844	0.69165	0.404806	0.303564	0.790737	0.383969
0.790912	0.659053	0.377662	0.28861	0.760699	0.376557
0.783464	0.669464	0.387866	0.292892	0.768103	0.375657
0.816401	0.703791	0.418163	0.311079	0.803274	0.381155
0.787752	0.658136	0.392796	0.296678	0.747427	0.390768
0.813626	0.679632	0.397885	0.298729	0.786032	0.386311
0.750925	0.68525	0.407316	0.306316	0.790689	0.378966
0.796074	0.654157	0.382318	0.291677	0.757408	0.373892
0.721963	0.653854	0.377813	0.288838	0.750022	0.355744
0.863986	0.692666	0.407838	0.30433	0.796787	0.380028
0.842763	0.694149	0.410637	0.307921	0.793797	0.373859
0.845104	0.696466	0.40709	0.304785	0.802136	0.377781
0.879367	0.726072	0.437059	0.321148	0.827531	0.399529
0.754633	0.669282	0.384781	0.290655	0.78187	0.377526
0.819134	0.675071	0.390731	0.295287	0.786454	0.373829
0.854852	0.679796	0.400484	0.300722	0.783713	0.374558
0.882932	0.695015	0.41218	0.306317	0.799694	0.389645
0.808908	0.676271	0.394163	0.297247	0.776092	0.372516
0.79911	0.687626	0.395315	0.293735	0.793477	0.382048
0.818228	0.652985	0.375428	0.285435	0.762838	0.396951
0.893008	0.668224	0.3835	0.28792	0.773434	0.418861
0.7666	0.681107	0.419614	0.318368	0.771252	0.383926
0.79911	0.67883	0.415989	0.316803	0.762587	0.382418
0.83304	0.656066	0.398429	0.303091	0.742013	0.376824
0.806987	0.684571	0.417584	0.315539	0.777042	0.388768
0.795052	0.675345	0.408788	0.312253	0.762778	0.370367
0.85192	0.694277	0.418907	0.317165	0.774412	0.378373
0.796074	0.68163	0.409603	0.307194	0.772543	0.3855
0.868664	0.697286	0.421271	0.314433	0.790344	0.393535
0.838782	0.676784	0.410723	0.311336	0.763048	0.382771
0.831362	0.672927	0.40405	0.302191	0.763165	0.393115
0.759492	0.677589	0.417106	0.318371	0.75165	0.367701
0.861239	0.703269	0.428517	0.321345	0.796445	0.396655
0.721963	0.674875	0.410588	0.308436	0.768434	0.378692
0.773498	0.680309	0.410038	0.305766	0.775885	0.388484
0.801109	0.664306	0.412069	0.313542	0.748405	0.374566
0.764254	0.693021	0.425171	0.320526	0.778068	0.389903
0.818228	0.715163	0.434983	0.324013	0.809196	0.402189
0.836346	0.733142	0.456549	0.342816	0.816578	0.386712
0.863305	0.739421	0.468288	0.351379	0.823056	0.389375
0.894601	0.738191	0.470918	0.354923	0.821867	0.380282
0.863305	0.72829	0.45476	0.340374	0.815539	0.402838
0.820934	0.735545	0.467533	0.35168	0.814967	0.397539
0.88525	0.728759	0.45623	0.342506	0.818313	0.395971
0.869971	0.730592	0.45225	0.338033	0.820709	0.398723
0.841183	0.717588	0.438258	0.327521	0.806534	0.387368
0.861239	0.724553	0.44651	0.334759	0.812756	0.38495
0.862619	0.732055	0.460103	0.346786	0.818204	0.396386
0.835526	0.735979	0.465653	0.347741	0.8284	0.397439
0.864665	0.735194	0.451741	0.335392	0.834269	0.398697
0.875693	0.729191	0.447827	0.332359	0.825348	0.406634
0.806987	0.700393	0.426854	0.32086	0.787147	0.382341
0.86668	0.72538	0.454283	0.341034	0.806094	0.396517
0.827955	0.724343	0.451204	0.33864	0.816737	0.39475
0.852658	0.717371	0.460507	0.352369	0.802844	0.383865
0.841975	0.702852	0.42803	0.322209	0.798819	0.389327
0.838782	0.714995	0.433328	0.323094	0.808388	0.387496
0.869971	0.728643	0.455167	0.341704	0.813001	0.380944
0.868664	0.711408	0.438158	0.330111	0.792759	0.384137
0.844327	0.710181	0.433639	0.325686	0.797846	0.376651
0.838782	0.742484	0.466278	0.348631	0.824712	0.391803
0.74716	0.681659	0.418045	0.320292	0.762319	0.36717
0.85192	0.698727	0.424803	0.319701	0.788529	0.390418
0.818228	0.716888	0.441073	0.329	0.808644	0.395067
0.806987	0.700758	0.430621	0.323537	0.78919	0.383935
0.837974	0.705342	0.432533	0.324991	0.79075	0.386164
0.812692	0.697791	0.432954	0.328191	0.777105	0.375818
0.784544	0.719244	0.453661	0.344614	0.797235	0.37871
0.920738	0.724362	0.460409	0.349594	0.80076	0.398792
0.863986	0.736836	0.470341	0.355475	0.820924	0.392452
0.878762	0.726217	0.455623	0.340723	0.818742	0.405707
0.899239	0.74065	0.472446	0.355567	0.824854	0.398914
0.94766	0.728714	0.458265	0.341767	0.824185	0.414987
0.808908	0.714967	0.449022	0.338532	0.80065	0.379993
0.849682	0.706817	0.435602	0.327517	0.797778	0.391388
0.851177	0.706116	0.430521	0.32145	0.804403	0.40059
0.848928	0.69521	0.413949	0.3095	0.793277	0.390279
0.846645	0.685139	0.415276	0.31084	0.777193	0.386195
0.87062	0.670833	0.395252	0.295766	0.767778	0.387994
0.803088	0.668176	0.403095	0.305462	0.752931	0.384857
0.850431	0.676005	0.394993	0.296998	0.766591	0.390779
0.834701	0.648839	0.373814	0.285515	0.741852	0.372786
0.771221	0.659606	0.385276	0.291511	0.751747	0.373496
0.86668	0.698985	0.414927	0.3078	0.794202	0.388815
0.783464	0.651346	0.386444	0.293461	0.739582	0.380702
0.789864	0.663007	0.388144	0.290878	0.765296	0.383342
0.755857	0.667301	0.393909	0.296107	0.769337	0.381859
0.767764	0.639514	0.370811	0.282951	0.737974	0.374582
0.829667	0.694201	0.41265	0.306433	0.791797	0.394722
0.854124	0.692699	0.415301	0.311157	0.78768	0.38672
0.8236	0.685835	0.40517	0.30214	0.786288	0.391875
0.864665	0.719163	0.430471	0.316321	0.818228	0.410374
0.784544	0.644786	0.367291	0.27864	0.751845	0.374722
0.851177	0.648528	0.365451	0.27662	0.759836	0.381086
0.840386	0.670072	0.392279	0.292835	0.770809	0.388696
0.884097	0.697124	0.417365	0.310508	0.796784	0.401627
0.814556	0.664741	0.388402	0.293673	0.760693	0.376245
0.803088	0.677816	0.392439	0.290744	0.779857	0.386261
0.763072	0.636	0.36411	0.276407	0.743473	0.381603
0.879968	0.654448	0.377928	0.28353	0.760607	0.396056
0.775751	0.650569	0.39533	0.301635	0.743214	0.375022
0.822716	0.653497	0.392343	0.302801	0.745181	0.36985
0.857013	0.619063	0.365384	0.284513	0.714807	0.361795
0.874444	0.648202	0.384134	0.293591	0.755549	0.373199
0.820036	0.651911	0.385329	0.296186	0.746311	0.360853
0.784544	0.663469	0.394736	0.30209	0.75144	0.362213
0.727468	0.647371	0.382931	0.293059	0.743016	0.366892
0.897203	0.65699	0.388369	0.295132	0.754914	0.374673
0.839586	0.637143	0.375255	0.28776	0.728211	0.363255
0.837974	0.646461	0.378926	0.285755	0.744114	0.375011
0.850431	0.641955	0.382045	0.294398	0.726261	0.350672
0.886958	0.658325	0.381947	0.28784	0.764753	0.374268
0.837162	0.631564	0.363716	0.277914	0.738031	0.359554
0.863986	0.627122	0.353598	0.270366	0.733693	0.366
0.789864	0.637008	0.374605	0.287469	0.733942	0.362163
0.820036	0.673767	0.405598	0.307807	0.770051	0.370436
0.874444	0.685554	0.405175	0.304849	0.788178	0.38975
0.879367	0.696761	0.425927	0.32388	0.785767	0.376513
0.924604	0.711095	0.432491	0.323694	0.803924	0.380837
0.932119	0.708851	0.432199	0.322947	0.800208	0.368182
0.942731	0.696644	0.416265	0.312949	0.789004	0.387944
0.881755	0.697192	0.427856	0.324251	0.78338	0.38123
0.842763	0.680652	0.398586	0.300576	0.777733	0.372328
0.867345	0.689408	0.40202	0.30206	0.78597	0.378469
0.780192	0.661408	0.379935	0.290345	0.749618	0.363823
0.886958	0.669735	0.384916	0.290748	0.760499	0.360791
0.929701	0.691193	0.410577	0.31124	0.778555	0.373667
0.883516	0.688368	0.412712	0.308576	0.790455	0.377584
0.868664	0.694271	0.405769	0.304031	0.804048	0.378792
0.928281	0.704263	0.41668	0.310289	0.810531	0.393312
0.892472	0.661909	0.387366	0.294349	0.760417	0.364819
0.909282	0.686775	0.403476	0.30446	0.775682	0.375339
0.916674	0.69613	0.419396	0.316436	0.793669	0.378067
0.928639	0.686034	0.424179	0.325717	0.777813	0.370025
0.863305	0.667737	0.387395	0.294778	0.772362	0.376848
0.918732	0.682985	0.396071	0.299285	0.780948	0.373677
0.878762	0.700417	0.422132	0.315896	0.793388	0.368823
0.914565	0.688942	0.415601	0.314163	0.77744	0.370659
0.915415	0.685712	0.40653	0.305193	0.785607	0.362149
0.933463	0.706737	0.43149	0.32423	0.79675	0.375774
0.871265	0.638723	0.373982	0.29322	0.729214	0.356804
0.904153	0.660851	0.378832	0.290522	0.758711	0.375835
0.888641	0.663475	0.383954	0.29201	0.761434	0.372804
0.889197	0.652346	0.377997	0.286945	0.746315	0.363083
0.919942	0.679772	0.407224	0.306184	0.772924	0.370336
0.879968	0.671085	0.402196	0.307701	0.756609	0.363684
0.883516	0.686669	0.416517	0.317346	0.770591	0.367824
0.926832	0.703759	0.43256	0.327184	0.785144	0.385061
0.926465	0.68629	0.415055	0.315398	0.773264	0.372101
0.941866	0.687263	0.414006	0.314216	0.786657	0.389922
0.941866	0.692593	0.415215	0.314378	0.783631	0.38204
0.966291	0.699273	0.424648	0.318415	0.793783	0.392993
0.803088	0.664146	0.393775	0.299326	0.750679	0.355609
0.859142	0.657358	0.379075	0.288608	0.757646	0.371372
0.904631	0.634636	0.354537	0.269933	0.734505	0.364001
0.891391	0.574586	0.307697	0.261131	0.658056	0.335151
0.821827	0.57689	0.307545	0.255496	0.657399	0.335259
0.856296	0.554868	0.28776	0.248666	0.630379	0.324565
0.742053	0.50562	0.280243	0.250738	0.537889	0.299892
0.873182	0.534988	0.28173	0.252114	0.589741	0.316203
0.782379	0.525154	0.281077	0.249383	0.58814	0.31301
0.818228	0.553567	0.296611	0.253395	0.626605	0.327496
0.902704	0.580682	0.30417	0.252345	0.669162	0.342622
0.829667	0.552048	0.299002	0.254892	0.622974	0.329608
0.868664	0.489928	0.277716	0.254546	0.521552	0.288146
0.84741	0.509189	0.281796	0.259385	0.553041	0.298984
0.834701	0.530966	0.285647	0.25752	0.605458	0.324886
0.768922	0.557072	0.30307	0.253345	0.642024	0.332309
0.904631	0.603033	0.317997	0.255248	0.706015	0.357753
0.874444	0.612249	0.33183	0.260529	0.710195	0.351801
0.882932	0.573412	0.299742	0.253437	0.663695	0.33848
0.897716	0.58987	0.302839	0.25033	0.676976	0.346953
0.780192	0.465953	0.283759	0.259278	0.494318	0.283692
0.8236	0.458091	0.276262	0.253613	0.47967	0.273957
0.909735	0.533934	0.288262	0.256913	0.611957	0.321972
0.856296	0.622541	0.342484	0.262438	0.7203	0.364091
0.641204	0.542271	0.288439	0.249565	0.616817	0.317301
0.774627	0.518928	0.280791	0.264509	0.586779	0.320363
0.74716	0.540258	0.290055	0.259052	0.620512	0.331645
0.7666	0.60246	0.386322	0.307147	0.702679	0.358032
0.862619	0.621882	0.394483	0.310607	0.726797	0.358166
0.840386	0.572217	0.35806	0.294177	0.679158	0.340846
0.855576	0.5977	0.380546	0.304379	0.714145	0.346975
0.760691	0.611568	0.383201	0.305459	0.702474	0.335286
0.784544	0.633576	0.402329	0.317479	0.731018	0.349965
0.798103	0.619035	0.390848	0.307826	0.729174	0.354753
0.873814	0.612379	0.372254	0.292871	0.718822	0.355333
0.74076	0.586405	0.360072	0.290903	0.6812	0.34609
0.7666	0.610248	0.378639	0.295749	0.72275	0.371949
0.77687	0.596152	0.370093	0.297264	0.68309	0.344478
0.826226	0.60126	0.368354	0.294811	0.715428	0.369207
0.780192	0.569743	0.348693	0.281864	0.681824	0.347104
0.700308	0.552558	0.336987	0.286227	0.650942	0.342535
0.781288	0.584625	0.361444	0.290586	0.688038	0.34794
0.801109	0.643884	0.408332	0.318978	0.755569	0.373212
0.841975	0.644616	0.399879	0.312721	0.76086	0.377533
0.888641	0.674161	0.430391	0.335075	0.775744	0.36747
0.858436	0.67209	0.429647	0.332927	0.771346	0.369628
0.901726	0.668948	0.428287	0.332108	0.77164	0.358113
0.890846	0.625861	0.389366	0.308825	0.727298	0.353335
0.871265	0.641947	0.409167	0.32237	0.734845	0.357753
0.831362	0.603112	0.371799	0.302095	0.689492	0.341597
0.834701	0.611799	0.36825	0.298015	0.696899	0.345302
0.848928	0.587042	0.354813	0.295483	0.660776	0.339246
0.79911	0.606436	0.362314	0.294912	0.690003	0.34191
0.839586	0.650704	0.40181	0.313931	0.751356	0.372225
0.819134	0.63531	0.392605	0.308368	0.751907	0.378282
0.826226	0.63324	0.390936	0.310371	0.759381	0.37179
0.863986	0.661267	0.409859	0.31778	0.791331	0.389879
0.788811	0.608693	0.376922	0.300943	0.719424	0.357432
0.84741	0.622234	0.373424	0.29596	0.717395	0.363664
0.798103	0.647339	0.405375	0.319867	0.757192	0.366244
0.838782	0.622328	0.392208	0.31549	0.716081	0.344772
0.794025	0.603161	0.368044	0.295769	0.719293	0.352565
0.819134	0.637743	0.392139	0.309937	0.753375	0.360419
0.783464	0.655038	0.410583	0.318047	0.758479	0.351094
0.767764	0.593088	0.37064	0.297044	0.680916	0.338266
0.816401	0.612356	0.378679	0.298006	0.727658	0.346397
0.822716	0.654652	0.410966	0.319007	0.758192	0.359964
0.681776	0.528835	0.336713	0.28893	0.604541	0.322406
0.789864	0.606919	0.365601	0.293578	0.714561	0.363885
0.742053	0.588722	0.355581	0.291958	0.679639	0.357993
0.73946	0.570564	0.344957	0.285796	0.653533	0.34848
0.798103	0.626108	0.388157	0.304097	0.735344	0.370446
0.726102	0.607978	0.380933	0.306542	0.702489	0.352374
0.731526	0.629095	0.402208	0.323347	0.724612	0.358889
0.859142	0.663359	0.423371	0.328971	0.76257	0.383188
0.74716	0.608109	0.373088	0.303252	0.679055	0.335762
0.886958	0.643919	0.40422	0.318171	0.75659	0.376288
0.837974	0.62152	0.378813	0.302544	0.711363	0.348444
0.73018	0.591412	0.361607	0.29573	0.660376	0.323158
0.784544	0.583967	0.341565	0.284315	0.678405	0.362263
0.697296	0.55116	0.323705	0.280709	0.620322	0.342705
0.630277	0.481247	0.308893	0.283184	0.514184	0.29119
0.603469	0.470223	0.307214	0.28634	0.506116	0.285739
0.67372	0.456954	0.299202	0.280806	0.48741	0.279329
0.566126	0.41443	0.296108	0.278137	0.412343	0.258103
0.578948	0.437104	0.304331	0.28754	0.446469	0.273535
0.552912	0.437859	0.301099	0.281925	0.456913	0.27356
0.663784	0.460726	0.302024	0.283622	0.490232	0.283161
0.694254	0.480368	0.300688	0.282837	0.52473	0.30033
0.678578	0.465498	0.293403	0.268943	0.513937	0.297588
0.555142	0.407045	0.290605	0.26958	0.394812	0.245222
0.539296	0.415055	0.293656	0.274955	0.397204	0.248905
0.660404	0.447806	0.294628	0.271506	0.461394	0.263607
0.42305	0.472537	0.301095	0.270271	0.529138	0.288237
0.658702	0.509503	0.300984	0.272377	0.566997	0.313644
0.648308	0.476204	0.301525	0.283178	0.512106	0.294609
0.70329	0.473378	0.291588	0.274282	0.504113	0.291452
0.515675	0.371727	0.288045	0.269706	0.363575	0.241478
0.559568	0.384198	0.288739	0.270913	0.376691	0.243979
0.503415	0.452328	0.311467	0.292142	0.475592	0.27655
0.66546	0.53362	0.312081	0.283148	0.60531	0.330545
0.605446	0.464796	0.305415	0.282679	0.49906	0.281205
0.624689	0.470008	0.299488	0.282358	0.515273	0.292358
0.559568	0.436814	0.31041	0.29189	0.445374	0.268955
0.622808	0.45765	0.298707	0.27847	0.47013	0.278392
0.695779	0.547092	0.336374	0.27812	0.653011	0.296788
0.80602	0.566788	0.345305	0.282668	0.676466	0.304307
0.74076	0.51169	0.331446	0.284528	0.600008	0.290294
0.768922	0.520388	0.312117	0.26289	0.630177	0.28218
0.683363	0.522807	0.341706	0.289056	0.588032	0.279644
0.73018	0.57588	0.353991	0.289289	0.682561	0.300791
0.697296	0.55647	0.341567	0.28179	0.66704	0.303259
0.686514	0.504865	0.32686	0.284965	0.575036	0.273737
0.620917	0.462538	0.291485	0.259835	0.518187	0.251474
0.700308	0.526238	0.335927	0.284677	0.617975	0.294538
0.581048	0.453171	0.289967	0.260699	0.496284	0.245128
0.633955	0.499835	0.322517	0.282204	0.575759	0.276714
0.485726	0.474888	0.302219	0.267071	0.541076	0.261127
0.650062	0.441602	0.292613	0.267028	0.474032	0.248521
0.763072	0.517764	0.326835	0.278937	0.582045	0.273572
0.759492	0.566675	0.338665	0.277641	0.659083	0.277911
0.700308	0.583196	0.356792	0.291332	0.710969	0.317435
0.716346	0.605573	0.366142	0.291842	0.717397	0.313985
0.775751	0.576968	0.363465	0.299747	0.662271	0.30052
0.796074	0.575591	0.33953	0.276361	0.668409	0.285529
0.675348	0.51442	0.329811	0.283027	0.584562	0.283979
0.70329	0.55138	0.343921	0.287968	0.632821	0.289943
0.648308	0.478903	0.298873	0.265786	0.518187	0.252153
0.717761	0.483037	0.318815	0.281948	0.51125	0.260592
