# Supplementary material for: Estimation of maize LCC and FVC for full growth periods based on UAV remote sensing and ensemble learning
Source: PeerJ journal article supplement (doi:10.7717/peerj-cs.3356), 2025-11-04
Supplement: LCC_O_GLCM.xlsx [file LCC_O_GLCM.xlsx]

## Sheet: Sheet1
48.8	35.8413	6.8325	0.434336	12.0528	2.43371	1.88936	0.295216	0.628818
56.3	36.5246	6.26022	0.440693	11.3148	2.35461	1.8788	0.299133	0.623583
69.1	35.3824	4.88426	0.448089	8.8246	2.11512	1.8634	0.286834	0.625569
53.4	36.2409	4.72298	0.46205	8.4609	2.0541	1.83455	0.302113	0.631246
50	35.5696	4.54733	0.465963	8.1409	2.00017	1.83151	0.300183	0.626651
46.4	35.2192	4.62869	0.458476	8.28098	2.03594	1.84479	0.295432	0.625076
48.7	33.7033	4.52691	0.458866	8.20909	2.02629	1.83842	0.295871	0.624063
56.6	35.0325	4.96593	0.445048	9.10061	2.15158	1.86638	0.285826	0.625397
48.8	34.0621	4.69959	0.459611	8.33939	2.03543	1.84142	0.294905	0.627284
46.7	33.6273	4.66246	0.454431	8.31722	2.04402	1.85206	0.287393	0.621933
51.3	31.517	4.04993	0.476748	7.36937	1.89946	1.80367	0.305249	0.616173
42.5	33.1461	4.71587	0.461739	8.4167	2.03777	1.83592	0.296597	0.620415
51.2	33.4268	4.64556	0.457905	8.37658	2.04212	1.84135	0.291317	0.624891
48.1	32.6134	4.59377	0.459805	8.42696	2.04918	1.84223	0.297752	0.619313
50.3	35.753	5.17827	0.450643	9.40518	2.16185	1.85697	0.293758	0.628339
48.9	33.9759	6.15092	0.437803	10.8119	2.31707	1.8846	0.287316	0.6175
48	34.174	6.54423	0.43861	11.2888	2.35884	1.88707	0.291063	0.622667
52.6	35.2971	6.04009	0.439432	10.8227	2.31061	1.88	0.290944	0.621278
53.3	37.52	4.58277	0.462363	8.43865	2.04195	1.83248	0.301891	0.627215
51.4	38.5522	4.83383	0.458601	8.8401	2.09578	1.83685	0.301921	0.629907
53.9	38.0366	4.49728	0.477654	7.98224	1.95286	1.80555	0.311341	0.628416
54	36.7149	4.79302	0.464299	8.49881	2.04818	1.82781	0.306658	0.633262
53.4	38.1417	4.73342	0.461718	8.48888	2.04545	1.8323	0.305328	0.631645
47	35.7569	4.27958	0.490034	7.40023	1.87278	1.78195	0.317671	0.624724
50.5	36.7876	4.45708	0.467009	8.002	1.98686	1.82575	0.302093	0.630804
51.6	37.3954	4.62855	0.458194	8.31239	2.03582	1.84458	0.294916	0.63008
53	36.333	4.76984	0.455134	8.60408	2.07001	1.84837	0.292174	0.628469
52.3	35.1866	4.95313	0.454329	8.74802	2.09179	1.85516	0.29402	0.628917
57.6	36.209	4.84595	0.459421	8.5393	2.05638	1.84326	0.298112	0.632165
54.1	36.8522	4.67402	0.456764	8.26717	2.04216	1.84604	0.294474	0.630929
50.7	37.3603	4.56608	0.463856	8.27089	2.02452	1.83244	0.299151	0.629672
48.7	35.9742	6.26247	0.429078	10.9609	2.35064	1.89612	0.284869	0.624065
47.4	37.6718	6.70712	0.417346	12.0819	2.48709	1.91971	0.276589	0.623164
51.7	35.6379	5.8416	0.442047	10.2384	2.24059	1.8802	0.290379	0.620704
50.5	37.5566	4.43847	0.465718	8.23487	2.00702	1.82202	0.299714	0.629927
46.4	37.7991	4.91563	0.452375	8.85351	2.11127	1.84951	0.295157	0.629927
47.8	36.8929	4.42068	0.478384	7.75903	1.93069	1.80586	0.312371	0.633778
40.4	31.4497	3.68231	0.5156	6.47011	1.71652	1.73707	0.323808	0.612998
43.2	35.9548	4.7627	0.450555	8.72106	2.09699	1.85656	0.290342	0.629967
44	34.7423	4.73127	0.449267	8.48993	2.07868	1.85605	0.286906	0.625303
42.8	34.9646	4.59252	0.456283	8.33717	2.04239	1.84405	0.291487	0.627249
50.5	38.2201	4.71776	0.451143	8.48039	2.07477	1.85941	0.286763	0.630989
44	33.7995	4.48495	0.468458	8.0969	1.99237	1.82278	0.300577	0.62414
44.6	37.2311	4.71554	0.455445	8.51951	2.0709	1.84401	0.294923	0.630587
54.9	36.5768	4.86469	0.462199	8.33038	2.02664	1.84104	0.298581	0.633015
51.5	36.4283	4.6549	0.459787	8.38349	2.04591	1.84361	0.29428	0.631002
49.8	37.2181	4.63145	0.459933	8.42988	2.05	1.84377	0.296165	0.629436
44.5	34.8455	6.014	0.430763	10.9549	2.34809	1.89361	0.286879	0.618126
45.8	37.0052	6.28639	0.446615	10.8583	2.29799	1.87363	0.294788	0.623984
48	36.5517	5.71784	0.453487	10.038	2.20962	1.8592	0.313409	0.625457
54.1	42.3393	4.32821	0.525128	7.78644	1.74734	1.71756	0.335924	0.610144
47.5	42.6729	3.52998	0.553202	5.94095	1.56405	1.67624	0.366248	0.617037
51.2	41.9125	4.57009	0.531799	8.253	1.78488	1.7036	0.363293	0.618736
47	42.071	4.11288	0.534119	6.72848	1.68331	1.71264	0.363408	0.625738
49.7	40.1306	4.38876	0.527169	7.67137	1.75508	1.72556	0.355062	0.622011
47.8	41.89	3.96773	0.523231	6.78905	1.71608	1.72646	0.343522	0.620344
46.2	40.6458	4.38322	0.534018	7.80233	1.73128	1.70345	0.355896	0.61314
44.1	42.1357	3.50515	0.536631	6.08942	1.63003	1.69681	0.350075	0.617596
46.4	42.0652	3.75465	0.545525	6.47661	1.61164	1.68614	0.354606	0.616418
45.7	40.3828	3.66072	0.52733	6.36057	1.65701	1.71912	0.339751	0.61593
50	41.3841	4.41827	0.516095	8.08533	1.81648	1.73348	0.336547	0.611681
49	43.1425	3.71898	0.529152	6.42262	1.68642	1.71315	0.34823	0.619245
45.1	41.2618	4.14152	0.521657	7.44324	1.75538	1.72427	0.342123	0.610656
49.1	41.011	3.87597	0.524131	6.52579	1.6885	1.73113	0.339602	0.617411
45.8	40.6007	4.53467	0.523211	7.95031	1.79085	1.72325	0.348847	0.615496
50.3	41.101	4.553	0.510439	8.05637	1.84686	1.74657	0.334761	0.61206
51.7	45.0164	4.33015	0.532264	7.25022	1.71416	1.7066	0.346433	0.623417
46.4	43.8887	4.22547	0.525791	7.19793	1.7348	1.71348	0.344026	0.616628
50.7	43.0264	4.35293	0.521721	7.49492	1.74258	1.73095	0.332973	0.613371
51.9	43.9705	3.79071	0.522206	6.35849	1.6679	1.73323	0.330264	0.613077
49.7	44.6192	3.86108	0.536226	6.54781	1.65224	1.69876	0.346935	0.618765
47.9	43.8212	4.20123	0.523746	7.07184	1.72428	1.72377	0.338914	0.618564
47.3	44.3948	4.14013	0.533443	7.12019	1.68811	1.70872	0.343415	0.614649
45.2	46.2865	3.73317	0.540187	6.12083	1.62161	1.69664	0.344213	0.624307
50.2	43.5716	4.3	0.521201	7.50099	1.76366	1.72597	0.33631	0.615547
49.3	43.2192	4.39321	0.526243	7.26478	1.72587	1.71636	0.342088	0.620533
45.1	43.3964	4.51339	0.518826	7.90935	1.78392	1.73158	0.335658	0.610734
50.6	44.9313	3.99197	0.52722	6.72876	1.68656	1.71599	0.338584	0.615314
52.8	43.6135	4.36397	0.519883	7.41705	1.77339	1.73657	0.340273	0.619592
49.6	44.6431	4.53002	0.520778	7.49085	1.76194	1.73131	0.3361	0.619879
51.4	42.6166	4.34239	0.51513	7.25857	1.77564	1.7424	0.339331	0.614852
47.3	44.6222	4.62349	0.520081	7.96249	1.80176	1.72854	0.333678	0.612516
51.5	43.5169	4.7236	0.51246	8.17258	1.81357	1.74635	0.323688	0.616378
47.7	42.5143	4.10475	0.509753	7.17677	1.77369	1.74622	0.329271	0.614091
49.1	43.5726	4.46318	0.512199	8.06715	1.82014	1.74009	0.327704	0.61124
45.3	43.9101	4.32194	0.499543	7.68722	1.84249	1.77179	0.316388	0.614114
53.1	42.5634	4.27326	0.508669	7.61075	1.7947	1.75472	0.323937	0.610646
45.6	43.2117	4.37542	0.503174	7.77429	1.84166	1.75951	0.324193	0.614293
46.4	41.8987	4.17354	0.498352	7.40988	1.81555	1.77286	0.31562	0.615298
51.3	42.923	4.38526	0.497906	7.65457	1.84044	1.77561	0.315186	0.611974
49.3	39.1072	3.72619	0.508077	6.1518	1.69162	1.7666	0.319424	0.623918
44.7	41.2449	4.43612	0.513109	7.66848	1.7823	1.7429	0.334187	0.615972
43.4	42.9542	4.31445	0.513199	7.35243	1.77628	1.74707	0.330341	0.61558
47.2	42.2907	4.37434	0.504707	7.72313	1.81995	1.75887	0.322919	0.609339
49.5	42.5195	4.15189	0.51096	7.30633	1.79452	1.74781	0.332228	0.611962
48.2	41.7832	4.48834	0.506437	7.81703	1.82729	1.75642	0.329018	0.614021
49.3	41.3353	4.37526	0.512939	7.52602	1.82576	1.74238	0.339705	0.613634
49.4	44.2891	4.90349	0.526914	8.62792	1.80615	1.71464	0.33648	0.60355
51.2	44.7819	4.04327	0.542964	6.88979	1.66453	1.6818	0.357862	0.62415
49.1	46.6725	3.53114	0.562541	5.59071	1.53349	1.64231	0.364547	0.626512
48.8	46.1678	4.04437	0.550167	6.86191	1.63945	1.6654	0.355347	0.620847
49.8	44.721	3.73611	0.539945	6.29027	1.63771	1.69275	0.349557	0.620411
46.7	45.3074	3.89941	0.529473	6.6258	1.67109	1.71864	0.336352	0.615954
47.8	43.8423	4.06234	0.549009	6.6656	1.63675	1.67612	0.35854	0.622359
47.6	44.6914	4.06722	0.541593	7.00104	1.68346	1.68155	0.357493	0.614562
49	45.379	4.29177	0.517417	7.45712	1.77612	1.7391	0.334123	0.612951
50.6	44.1666	4.47394	0.515172	8.01115	1.8173	1.74375	0.329933	0.608773
52	43.7191	4.52774	0.51359	7.93614	1.8	1.74313	0.328567	0.609395
53.9	43.7835	4.5042	0.527901	7.90913	1.7761	1.71106	0.346862	0.612705
47.6	45.2744	3.96874	0.532014	6.79104	1.6839	1.70704	0.339367	0.615815
47.5	44.0914	4.27641	0.518215	7.55111	1.80038	1.73737	0.339522	0.612391
44.5	44.1337	4.96183	0.502097	8.87068	1.90472	1.76432	0.322911	0.604141
48.7	44.4365	4.28822	0.512631	7.34368	1.80136	1.74572	0.33269	0.613885
51.7	44.2424	5.1949	0.510589	9.12881	1.89519	1.75303	0.328712	0.608767
43.6	46.3229	3.7973	0.546935	6.40136	1.60108	1.6747	0.344105	0.617725
45.6	44.8039	3.41579	0.548365	5.3515	1.52674	1.6768	0.348944	0.62636
51.2	45.0489	4.32328	0.536869	7.4696	1.69665	1.69123	0.343656	0.61416
50.8	39.6351	4.05313	0.528374	6.9009	1.70114	1.71527	0.345167	0.61902
45.4	44.0404	4.43331	0.513088	7.80987	1.8054	1.74798	0.332291	0.609171
47.6	42.794	4.93753	0.501301	8.692	1.89016	1.76371	0.32516	0.610005
49.5	43.1619	4.23074	0.51166	7.33819	1.79834	1.75221	0.338118	0.615111
51.3	46.3908	3.79313	0.531377	6.33919	1.65739	1.71002	0.337724	0.617744
45.8	43.2014	4.43959	0.510817	7.56168	1.81222	1.74921	0.331948	0.621518
48.8	45.006	3.8116	0.544014	6.49527	1.63908	1.68144	0.35162	0.62183
51.6	44.988	3.91162	0.529753	6.46677	1.67923	1.71804	0.34188	0.621127
49.1	44.6229	4.24875	0.537847	7.21154	1.69498	1.69614	0.348379	0.615144
46	43.9933	4.37868	0.523526	7.57683	1.77507	1.72775	0.340716	0.611212
48	43.8182	4.56658	0.512121	7.92575	1.8128	1.74887	0.329525	0.616225
48.5	44.2156	4.08225	0.53389	6.63287	1.67485	1.70206	0.349977	0.622548
47	45.9014	4.61797	0.529653	8.12867	1.77149	1.7086	0.339403	0.610109
51.6	46.1204	4.25025	0.595119	6.90813	1.5985	1.57121	0.404102	0.634142
57.1	46.4057	3.83045	0.623838	5.62616	1.44686	1.52211	0.429707	0.644835
62	46.3145	4.62112	0.5973	7.28219	1.59712	1.55661	0.410726	0.636331
45.6	46.341	4.19693	0.608821	6.02857	1.50604	1.55208	0.42392	0.650184
52.3	44.8216	4.63364	0.581319	7.43289	1.68889	1.59404	0.412727	0.645562
48.1	46.0351	4.16239	0.601159	6.43168	1.5582	1.55835	0.413532	0.643582
53.3	45.1677	4.42034	0.593871	7.33282	1.61767	1.57113	0.408256	0.633876
50.8	47.159	3.8534	0.583747	6.24587	1.54531	1.59024	0.378592	0.622944
50.6	46.1377	3.91641	0.589063	6.2997	1.53976	1.5814	0.387176	0.62517
54.3	46.2594	3.97126	0.585956	6.54461	1.57955	1.58628	0.388385	0.632722
54.4	45.9936	4.3352	0.592371	6.79085	1.61363	1.5775	0.411183	0.642709
52.6	48.5459	3.88079	0.602171	6.0925	1.50978	1.55638	0.406513	0.63667
49.1	45.6094	3.97909	0.596968	6.35875	1.59035	1.56653	0.415693	0.645351
50.1	47.318	3.97961	0.597359	6.19974	1.53352	1.56816	0.403792	0.640246
45.7	45.0589	4.217	0.605636	6.34034	1.5435	1.54851	0.419828	0.647303
52.8	45.933	4.45906	0.594552	7.1019	1.62393	1.56708	0.419324	0.646442
53.8	50.0753	4.0901	0.609401	6.39563	1.52299	1.53405	0.407223	0.633585
54.2	48.6619	4.29173	0.599909	6.43615	1.56577	1.55832	0.407667	0.644916
49.6	47.883	4.08012	0.595252	6.14355	1.52075	1.57591	0.394104	0.633776
56	48.1515	3.59485	0.599791	5.26277	1.44	1.5616	0.395459	0.63691
58.2	49.5634	3.78855	0.616835	5.52151	1.40826	1.52785	0.409284	0.634376
53.4	50.6898	4.00381	0.596309	6.02214	1.49974	1.56711	0.387327	0.63116
51.7	50.0448	3.9338	0.597144	5.73989	1.47056	1.56828	0.382931	0.628301
56.6	50.5328	4.01178	0.595811	6.07054	1.4854	1.56739	0.381487	0.624664
56	47.882	3.9453	0.591534	5.90539	1.51088	1.581	0.383659	0.629069
50.9	48.2906	4.21025	0.595598	6.37785	1.54689	1.56822	0.397166	0.635345
52.3	48.4223	4.28544	0.598547	6.65884	1.57583	1.55917	0.406989	0.637455
54.7	49.5883	4.14004	0.58308	6.57437	1.57558	1.59082	0.388587	0.63025
53	48.2769	4.27825	0.584526	6.34176	1.59659	1.59798	0.398184	0.647887
48.2	49.3222	3.92486	0.608822	5.93811	1.49013	1.53891	0.411002	0.641047
48.3	47.4142	4.09476	0.591576	6.44391	1.58502	1.56799	0.39946	0.642946
55.9	49.4049	4.16789	0.603523	6.45698	1.51291	1.54315	0.407818	0.637788
54.2	48.1264	4.27669	0.575992	6.78123	1.62308	1.60792	0.386778	0.639814
51.5	46.421	4.28822	0.569657	7.03049	1.67703	1.61775	0.377596	0.63492
52.9	48.4811	4.08994	0.57991	6.64297	1.5845	1.59741	0.3769	0.629882
48.8	48.3491	3.97774	0.57058	6.24768	1.59098	1.62063	0.367055	0.633494
55.1	47.0872	4.01461	0.579612	6.35442	1.57744	1.59418	0.382717	0.635844
51.5	48.2212	4.13204	0.580462	6.66288	1.59815	1.59453	0.381626	0.626541
51.3	45.9185	4.4934	0.556102	7.33857	1.70819	1.65363	0.358258	0.625419
52.4	48.971	4.00691	0.573871	6.36302	1.56892	1.61186	0.368136	0.626902
54.3	43.4661	4.98061	0.564078	7.88468	1.69304	1.63795	0.36858	0.624632
51.7	46.4024	4.63277	0.583596	7.27428	1.61541	1.59355	0.389066	0.627631
53.2	47.9355	4.15064	0.5797	6.31542	1.57383	1.61071	0.376423	0.634854
51.8	47.2654	4.01959	0.591406	6.08286	1.51009	1.57969	0.389962	0.632529
54.3	47.2575	3.92854	0.59073	6.33012	1.57456	1.57515	0.396707	0.638485
49.7	46.4463	4.19131	0.582143	6.62452	1.5972	1.58962	0.389362	0.638338
50.5	46.415	4.41923	0.572951	7.23356	1.68776	1.60119	0.39002	0.64596
52.6	49.1844	3.76631	0.61689	5.71795	1.42277	1.51674	0.411136	0.635944
57.1	49.2108	4.21723	0.600102	6.47571	1.53895	1.55227	0.404996	0.637733
53.3	50.8835	3.61093	0.617793	5.52104	1.41385	1.50704	0.404097	0.632962
56.3	49.7422	3.87448	0.614504	6.00692	1.46071	1.52287	0.406089	0.633874
53.5	50.0051	3.66732	0.616766	5.53821	1.42573	1.52664	0.402989	0.635693
49.8	48.5134	4.02415	0.572255	6.14272	1.56376	1.61796	0.373729	0.634155
51.8	48.5336	3.72291	0.604675	5.68167	1.45148	1.54629	0.388982	0.631538
50.1	48.5906	3.99462	0.592639	6.19072	1.53048	1.57798	0.385285	0.627994
51	48.9571	4.43276	0.56225	6.95219	1.63477	1.64284	0.363886	0.623769
56.4	46.9458	4.27856	0.55998	6.80587	1.66943	1.64324	0.363187	0.629197
54.3	47.8035	4.38375	0.564648	6.98915	1.63262	1.63486	0.359575	0.626811
58.4	47.8523	4.30946	0.585288	6.78869	1.60418	1.58568	0.385649	0.63187
51.8	49.7717	4.2928	0.588359	6.67213	1.55051	1.58512	0.380033	0.628975
52.7	48.1472	4.28165	0.581489	6.54293	1.59888	1.59337	0.387807	0.638632
48.7	47.2914	4.1273	0.578158	6.61104	1.62372	1.59762	0.387778	0.635491
53.4	48.8517	3.97951	0.583121	6.24588	1.55736	1.59243	0.381399	0.635813
56.7	47.2646	3.91652	0.603881	6.09309	1.4808	1.55359	0.391905	0.631956
53.3	49.2274	3.70842	0.588178	5.87439	1.47707	1.57737	0.370049	0.623334
56.7	48.7078	3.64059	0.573875	5.46759	1.48429	1.62357	0.360594	0.630649
54.1	47.6314	4.00435	0.585783	6.51935	1.54772	1.58224	0.374967	0.62473
53.8	44.1302	4.63834	0.571211	7.30395	1.61853	1.62452	0.372284	0.628921
49.6	48.1418	4.01946	0.581258	5.8215	1.51419	1.60675	0.375385	0.632756
50.3	45.2873	3.77953	0.577892	5.95437	1.52479	1.6011	0.369181	0.627054
50.1	46.0512	3.69261	0.582989	5.69909	1.50444	1.59133	0.373442	0.631017
53.6	49.3563	3.91711	0.588468	6.23527	1.50693	1.5785	0.378421	0.623385
51.4	47.0602	3.99118	0.572072	6.36369	1.59186	1.61435	0.366636	0.630676
51.2	49.6349	3.75698	0.585534	5.88563	1.47326	1.59371	0.363581	0.61818
56.3	49.303	3.79688	0.592168	5.73872	1.47539	1.58076	0.371513	0.628699
51.6	49.9465	3.98478	0.613083	6.08108	1.44867	1.53438	0.397503	0.628006
50.4	47.8918	4.13448	0.589226	6.40834	1.54475	1.57433	0.383459	0.632378
49.3	47.9014	3.99951	0.577855	6.30365	1.59356	1.6058	0.379813	0.640067
52.7	48.3099	4.29499	0.582069	6.7635	1.56304	1.59368	0.373751	0.628933
48.9	49.0475	3.55621	0.594311	5.70306	1.46385	1.55616	0.379911	0.62577
60.3	47.0777	3.43534	0.615486	5.84171	1.37319	1.50267	0.401144	0.605202
58.2	48.8639	2.85666	0.657193	4.54267	1.19342	1.4139	0.438987	0.626491
56.4	48.6197	2.66136	0.65705	4.22062	1.1787	1.41638	0.441932	0.633982
47.6	49.4523	2.80531	0.645492	4.26458	1.21222	1.4543	0.438641	0.637426
50.6	48.4309	2.58312	0.62991	4.03868	1.24573	1.48002	0.426775	0.637547
53.7	49.027	2.90366	0.647897	4.7454	1.23692	1.4285	0.441004	0.629951
51.9	48.2222	2.5208	0.648191	4.02257	1.18151	1.43564	0.434792	0.633116
49.2	49.879	2.43785	0.624015	4.2035	1.23099	1.48304	0.403284	0.608712
51.7	49.2351	2.33118	0.610523	3.84865	1.23335	1.52354	0.385997	0.610568
47.4	47.2491	2.23475	0.628293	3.73677	1.16243	1.46069	0.399576	0.610677
56.2	44.7512	2.00545	0.644864	3.25916	1.11275	1.43296	0.422976	0.62586
56.1	48.2022	2.58794	0.637803	4.35509	1.19959	1.45712	0.414368	0.608636
47.4	48.4856	2.49108	0.604091	4.25981	1.29466	1.53049	0.389949	0.615783
49.9	49.2567	3.10415	0.593938	5.11975	1.35865	1.56829	0.372514	0.602187
48.5	47.0203	4.6981	0.588752	8.17855	1.60422	1.56458	0.386522	0.59737
53.5	48.5895	4.61714	0.556817	8.27001	1.69975	1.63197	0.366815	0.585457
56.3	51.2247	3.34955	0.626617	5.82959	1.34778	1.4637	0.408444	0.593249
51.6	50.193	2.49774	0.644955	3.88861	1.18399	1.45095	0.431505	0.63419
54.6	49.8271	2.44858	0.637583	3.82486	1.197	1.46986	0.422493	0.633455
56.8	50.5709	2.31409	0.647897	3.64931	1.13903	1.44749	0.42448	0.62302
57.1	51.6335	2.10924	0.661746	3.06181	1.07825	1.41507	0.435278	0.632792
52.8	51.4759	2.3045	0.667097	3.54999	1.0968	1.39937	0.44777	0.629993
55.7	51.1577	2.49307	0.652878	3.91891	1.17142	1.42574	0.438119	0.623969
56.6	51.3992	2.90496	0.638371	4.81052	1.25004	1.456	0.421019	0.604418
55.2	49.8372	2.45844	0.614577	3.95099	1.23272	1.51154	0.393951	0.614351
56.5	49.7786	2.9907	0.616681	5.02447	1.30457	1.51109	0.399698	0.605292
51.9	49.475	2.67366	0.621205	4.34805	1.25408	1.49801	0.409334	0.618558
51.4	49.9889	2.82267	0.603957	4.79185	1.3122	1.5416	0.385304	0.604141
52.8	50.1163	2.87981	0.598892	4.69067	1.32885	1.55592	0.386721	0.616382
53.9	50.6598	3.14453	0.609476	5.37123	1.36685	1.5238	0.399156	0.607362
54.5	49.1594	4.86785	0.567697	8.82391	1.71073	1.60709	0.37284	0.584952
58.8	50.0226	4.70181	0.576744	8.41836	1.64766	1.58473	0.376961	0.578192
55.6	50.5024	2.93621	0.626772	4.94715	1.30274	1.48013	0.424355	0.623392
55.9	49.1433	2.73677	0.608646	4.50183	1.33021	1.52516	0.413199	0.637592
49.6	49.418	2.46037	0.627304	3.8102	1.21914	1.48415	0.41221	0.630995
51.6	50.1404	2.44005	0.625196	3.97718	1.22213	1.48433	0.403475	0.620095
54.9	49.2168	2.27071	0.635907	3.58185	1.18903	1.46899	0.424065	0.633805
50.4	50.061	2.84591	0.637265	4.61949	1.26928	1.46457	0.435637	0.629524
49.9	48.3859	2.94911	0.611038	4.74189	1.342	1.51909	0.414622	0.633289
55.5	50.2138	3.01646	0.627506	5.04795	1.31301	1.47762	0.419098	0.619633
53.7	47.2315	4.22415	0.596678	7.1524	1.50122	1.54821	0.39998	0.610536
48.2	48.2329	4.44244	0.593411	7.94237	1.54359	1.55123	0.386126	0.588758
49.5	48.6678	2.95374	0.600634	5.07886	1.33499	1.54487	0.381178	0.601033
55.2	48.717	3.62335	0.586352	6.31338	1.46815	1.57965	0.376689	0.596602
53.4	48.9973	3.43793	0.573971	6.00765	1.49601	1.602	0.365718	0.600134
50.7	47.904	3.59611	0.578756	6.20567	1.48587	1.58672	0.371684	0.603475
54.2	48.272	5.32952	0.540965	9.94431	1.8749	1.65616	0.359226	0.583596
52.5	50.0518	3.7937	0.6086	6.54944	1.42326	1.51682	0.387754	0.583741
53.6	51.506	2.41058	0.64653	3.97243	1.17395	1.43459	0.428095	0.616734
56.3	52.0894	2.09283	0.674661	3.26934	1.06827	1.37438	0.452339	0.628575
54.8	50.834	2.27948	0.669961	3.47241	1.11146	1.38855	0.455715	0.639323
52	51.4353	2.10283	0.675514	3.19189	1.06182	1.38187	0.449395	0.632797
56	49.9423	2.18434	0.618856	3.38042	1.18419	1.50588	0.395617	0.626739
51.4	50.6983	2.31546	0.665149	3.45632	1.11412	1.39875	0.448313	0.639178
55.7	50.9867	2.39352	0.655734	3.69289	1.13563	1.41411	0.428644	0.621961
52.2	50.4666	3.73248	0.597841	6.5953	1.45649	1.54394	0.386246	0.597094
55	49.1512	3.94029	0.560524	7.17044	1.60134	1.62245	0.361471	0.594718
56.8	49.9725	3.8118	0.568319	6.83469	1.53985	1.60552	0.356287	0.581258
61.5	49.8031	4.32816	0.57943	8.04253	1.59146	1.57708	0.369701	0.567128
58.1	50.8114	4.08347	0.543011	7.50674	1.65487	1.67088	0.339369	0.565451
54.9	49.7842	4.36524	0.520154	7.98099	1.75652	1.72252	0.325102	0.580379
54.7	49.6839	3.50053	0.556987	6.2063	1.54656	1.64008	0.35369	0.597845
56.6	49.843	3.87522	0.550784	6.91641	1.60982	1.65665	0.344318	0.59343
57.6	48.1064	4.24115	0.542805	7.70942	1.67365	1.67672	0.34116	0.581007
59.3	50.3122	2.33659	0.613576	3.99656	1.20707	1.50792	0.375233	0.589825
57.3	50.0419	2.13921	0.619682	3.49827	1.16	1.50317	0.38408	0.603076
58.9	48.894	2.15121	0.615806	3.56752	1.19938	1.50676	0.392776	0.616232
54.4	46.9802	3.36725	0.610371	5.54245	1.37431	1.51768	0.404178	0.616537
52.8	50.2034	2.44066	0.633217	3.61448	1.18765	1.48355	0.414072	0.626729
55.3	49.3902	2.88589	0.619701	4.61674	1.28555	1.50207	0.406279	0.622693
52.9	50.3085	2.44499	0.626558	3.92707	1.22078	1.48164	0.406817	0.618998
54.2	51.4159	2.46304	0.638609	4.05242	1.19361	1.45132	0.4158	0.614133
54.2	49.8661	2.4504	0.578164	4.24406	1.32964	1.59131	0.355032	0.59972
57.3	50.7646	2.4152	0.590774	4.08367	1.27621	1.56761	0.36038	0.596652
53.5	50.5248	2.12228	0.626787	3.48819	1.136	1.48677	0.381837	0.602718
55.5	50.4209	2.06429	0.633949	3.27779	1.12063	1.47033	0.399232	0.610625
52.3	51.0205	3.24038	0.575787	5.68816	1.43526	1.6065	0.355722	0.588358
54.3	52.2092	2.8632	0.56499	4.85491	1.425	1.62927	0.350809	0.61357
49.7	50.1184	3.69745	0.546057	6.7213	1.61516	1.65574	0.341697	0.579922
53.2	48.928	3.1581	0.573887	5.6183	1.45043	1.59696	0.36161	0.577546
65.2	46.8675	2.05165	0.657187	3.8259	1.13197	1.42106	0.398213	0.467826
58.3	46.484	1.90447	0.663761	3.45366	1.08988	1.41682	0.405915	0.472674
62.5	45.3762	1.76634	0.667432	3.18057	1.04567	1.40908	0.402104	0.470814
54.7	46.859	1.93486	0.664016	3.43959	1.05689	1.42028	0.392426	0.462735
64.4	45.3139	2.18894	0.643749	3.97717	1.17689	1.458	0.387463	0.461812
60.6	46.1383	2.08307	0.643422	3.83015	1.14944	1.45574	0.377263	0.454026
56.6	46.31	2.19401	0.651897	4.05646	1.14734	1.43652	0.388484	0.461593
59.8	47.215	2.03213	0.659653	3.66888	1.10763	1.42347	0.396474	0.466361
61.8	46.0378	2.24535	0.646194	4.11243	1.17861	1.45327	0.387565	0.462087
59	46.7532	2.24333	0.648387	4.22733	1.17221	1.44219	0.385126	0.459011
63.3	45.0682	2.33382	0.643461	4.27019	1.19463	1.45351	0.386291	0.461135
63.7	47.4604	2.16315	0.642737	3.9944	1.18429	1.45645	0.386673	0.461095
57	45.7875	2.18449	0.64223	4.08248	1.18367	1.45792	0.383092	0.458515
62.7	46.7803	2.03292	0.656807	3.59325	1.10225	1.43244	0.39324	0.464455
58.5	44.944	2.32309	0.651152	4.23533	1.18361	1.44255	0.399209	0.469379
63	46.8089	2.23725	0.646054	4.08644	1.17461	1.45093	0.387864	0.462945
60.8	48.3402	1.85099	0.653841	3.36106	1.08883	1.43762	0.38709	0.459377
62.4	47.7295	2.10789	0.647071	3.83765	1.13524	1.45358	0.378651	0.45337
60	47.6895	2.31034	0.647179	4.19392	1.18015	1.44797	0.38867	0.46013
62.8	46.5375	2.01101	0.645217	3.65205	1.13587	1.45248	0.380985	0.455907
63	48.5546	1.90395	0.652901	3.37743	1.07646	1.44213	0.378813	0.455151
65.7	48.5968	1.77398	0.667423	3.17216	1.03192	1.40599	0.392689	0.462874
62.9	47.6757	2.22732	0.646033	4.08955	1.17878	1.45057	0.389376	0.461743
62.2	48.2261	2.15716	0.646943	3.96449	1.16552	1.44957	0.387743	0.461095
60.4	47.5623	2.21607	0.650005	4.05052	1.15478	1.44122	0.387488	0.460429
62.3	47.1628	2.23076	0.646014	4.04905	1.17886	1.45284	0.388727	0.461447
62.8	47.6498	2.15315	0.640993	3.91434	1.17322	1.46314	0.381465	0.458187
62.1	47.9982	2.25509	0.646507	4.12695	1.17085	1.44915	0.385207	0.459231
62.9	48.0997	2.01845	0.645082	3.69547	1.13953	1.45268	0.380986	0.45867
58.7	48.0787	2.08002	0.64768	3.77567	1.1405	1.45288	0.384734	0.459095
60.4	46.152	2.36305	0.637895	4.47017	1.21994	1.46351	0.38026	0.455778
59	48.5785	1.90659	0.666856	3.46088	1.06661	1.40541	0.402007	0.470033
60	48.234	1.94467	0.652028	3.53578	1.10868	1.44279	0.385751	0.45992
63.3	46.9712	2.27492	0.630081	4.29513	1.24002	1.48016	0.376544	0.45539
60.9	47.2674	2.23286	0.635274	4.03117	1.19423	1.47224	0.374419	0.454944
61.1	47.5161	2.13376	0.635299	3.94117	1.17621	1.47526	0.369537	0.451298
61.4	46.6663	2.12099	0.644161	3.88708	1.16136	1.45278	0.381923	0.457006
60.7	46.4818	2.00511	0.647434	3.64775	1.12557	1.4496	0.382116	0.457024
57.7	46.3117	2.25374	0.637438	4.18422	1.1981	1.46627	0.376357	0.455404
66.5	48.022	2.06451	0.654559	3.75144	1.1194	1.43495	0.388464	0.459565
66.7	44.8557	2.25075	0.645512	4.03359	1.18225	1.45955	0.394857	0.466669
59.2	46.4908	2.09102	0.653718	3.80007	1.13666	1.43896	0.394997	0.466745
61	47.4541	2.21146	0.646429	4.07163	1.16496	1.45375	0.385238	0.459555
62.2	46.9155	2.07571	0.654037	3.73102	1.12859	1.43244	0.393242	0.464211
63.5	46.9493	2.05422	0.648474	3.80221	1.14617	1.44148	0.386455	0.459094
64.2	46.0157	2.16883	0.653317	3.99261	1.1502	1.43741	0.395649	0.466688
60.6	47.5357	2.26831	0.635471	4.181	1.21949	1.47384	0.383034	0.461306
62.2	50.194	2.09836	0.650408	3.75505	1.13122	1.43989	0.38626	0.457556
57	46.9918	1.97682	0.648686	3.64196	1.13059	1.45032	0.386847	0.462115
62.1	48.4469	1.90914	0.659813	3.39036	1.07119	1.42646	0.38872	0.461001
64.5	48.0011	1.99285	0.654758	3.68461	1.11171	1.43015	0.387252	0.460971
59.2	49.95	1.74862	0.669914	3.12054	1.02763	1.40098	0.394887	0.462961
62.8	46.7409	2.10192	0.643099	3.83897	1.15292	1.4596	0.380166	0.456581
61	47.0584	1.99807	0.657421	3.58659	1.10271	1.42914	0.394704	0.466869
57.5	48.4864	2.00611	0.657559	3.52095	1.10412	1.43154	0.394455	0.464371
63.4	48.0323	2.22131	0.631799	4.01859	1.1987	1.4822	0.368786	0.449679
57.3	47.1128	2.36553	0.633497	4.40076	1.22219	1.47638	0.372308	0.450297
61.4	47.7436	2.14977	0.633751	3.93956	1.18519	1.47679	0.369907	0.450571
65.2	46.917	2.26966	0.635535	4.22131	1.2178	1.47289	0.377914	0.45657
62.5	48.1574	2.17636	0.633203	3.987	1.18592	1.48073	0.367363	0.450496
60	47.2643	2.29024	0.628586	4.23967	1.22153	1.48368	0.366621	0.450909
60	47.0742	2.12939	0.632234	3.99344	1.19799	1.47638	0.369313	0.450583
58.9	47.8864	2.14794	0.639728	3.93187	1.1743	1.46549	0.377237	0.453528
59.8	48.3368	2.2314	0.650099	4.12542	1.14811	1.44114	0.382055	0.454876
61	48.4408	2.14848	0.638798	3.95799	1.16697	1.46761	0.370337	0.45018
59.1	47.7576	2.07766	0.644198	3.71419	1.13962	1.45697	0.376755	0.453388
59.7	46.9659	2.26974	0.635395	4.20762	1.20597	1.4703	0.374655	0.452834
62.4	45.2072	2.23263	0.63975	4.10967	1.18682	1.46793	0.380417	0.456194
60.5	47.8361	2.09658	0.647953	3.69626	1.13188	1.45234	0.383862	0.457855
58.5	47.0926	2.22481	0.634126	4.02694	1.19788	1.47565	0.372779	0.451775
57.2	47.8634	2.0691	0.643383	3.7663	1.14523	1.45582	0.377091	0.453077
62.2	49.4204	1.89594	0.663938	3.37057	1.0602	1.41635	0.392508	0.462134
59.5	47.6498	2.16549	0.631585	4.08916	1.21054	1.47812	0.371214	0.451442
58.6	47.187	2.08234	0.639637	3.75302	1.15728	1.46466	0.375633	0.454887
62.2	47.6331	2.02777	0.648587	3.62229	1.11323	1.44924	0.378073	0.454343
59	48.499	1.93291	0.661602	3.42607	1.07202	1.42393	0.390303	0.460849
57.2	47.1269	2.2474	0.629972	4.10452	1.20918	1.48649	0.366628	0.448482
57.9	48.0951	2.00022	0.645239	3.69189	1.13493	1.44947	0.37795	0.454354
58.4	48.2915	2.29959	0.64376	4.10757	1.1809	1.45708	0.382319	0.458859
54	50.3751	1.87138	0.657233	3.43027	1.08855	1.42225	0.388198	0.460187
63.9	48.689	3.07278	0.634283	5.72343	1.35701	1.46781	0.39351	0.463709
63.3	49.1713	2.41005	0.649557	4.39474	1.20998	1.44106	0.399207	0.466867
61.3	48.6679	2.30622	0.654666	4.21176	1.16606	1.43104	0.397536	0.466902
54.5	50.1042	2.6008	0.650302	4.70565	1.19512	1.44406	0.393476	0.464628
59.7	48.6178	2.58303	0.639719	4.78903	1.26274	1.45651	0.39353	0.466586
60.5	49.6682	2.21311	0.640356	4.11011	1.18798	1.46072	0.379394	0.457109
54.4	50.0633	2.58645	0.647627	4.90001	1.22176	1.4354	0.390681	0.462978
62.1	50.7918	2.30346	0.656862	4.20136	1.158	1.42297	0.398665	0.467257
62.8	49.4957	2.61816	0.645667	4.78294	1.22676	1.44496	0.391174	0.463771
61.3	50.4205	2.63013	0.654308	4.99606	1.21298	1.41901	0.398007	0.466242
60.6	48.3836	2.50554	0.640571	4.68959	1.23425	1.45218	0.387424	0.462716
59.2	51.0478	2.41646	0.647393	4.43353	1.21635	1.44294	0.396728	0.465772
63.7	49.2353	2.49489	0.645187	4.64177	1.23437	1.44322	0.397143	0.467797
60.7	50.6614	2.46	0.652963	4.36514	1.18444	1.43762	0.398978	0.467057
69.3	48.4111	2.64658	0.648007	4.83899	1.24067	1.44032	0.401428	0.468947
60.6	50.2369	2.48414	0.649436	4.5865	1.20664	1.43529	0.396278	0.468018
56.4	51.9096	2.35212	0.64207	4.30477	1.20743	1.45737	0.38678	0.460526
61.1	50.7386	2.32738	0.639502	4.24985	1.19726	1.46659	0.380134	0.455384
64.5	50.4037	2.56217	0.642621	4.6599	1.24437	1.45617	0.395051	0.465656
67.2	49.6418	2.4239	0.641711	4.36058	1.21666	1.45782	0.38655	0.461009
64.1	51.9089	2.26818	0.646169	4.11959	1.1624	1.4544	0.382877	0.457964
63.5	51.5722	2.25831	0.651066	4.14121	1.15668	1.44007	0.389716	0.461995
60.6	50.4523	2.67421	0.639113	4.90504	1.27443	1.46368	0.392225	0.463639
58.6	51.0059	2.53608	0.639646	4.65776	1.25253	1.46585	0.390784	0.463334
61.3	50.2815	2.60611	0.643433	4.8029	1.24389	1.45172	0.393166	0.4641
61.2	49.8569	2.66444	0.639847	4.86814	1.26886	1.4595	0.392003	0.463844
65.3	50.9406	2.7684	0.630774	5.07422	1.30436	1.4751	0.382825	0.459072
62.5	51.1992	2.73941	0.637822	4.99604	1.26974	1.46575	0.386495	0.459497
62.5	51.7122	2.45924	0.634462	4.56806	1.2452	1.47089	0.380143	0.458704
57.5	51.9529	2.2975	0.647967	4.15465	1.18495	1.44939	0.39252	0.463344
53.9	49.7859	2.99056	0.624333	5.70309	1.35815	1.48564	0.38017	0.457558
66	51.1628	2.25298	0.652918	4.18861	1.16747	1.43189	0.396959	0.46753
60.6	51.0324	2.42063	0.63836	4.43141	1.22648	1.46268	0.384796	0.461634
64.2	49.6382	2.75975	0.617622	5.31603	1.36847	1.50423	0.376676	0.457217
57.8	50.1912	2.77364	0.629865	5.07185	1.30825	1.48067	0.384468	0.460863
59.8	50.6459	2.65214	0.627435	4.96843	1.29038	1.48269	0.374253	0.453874
61.3	49.5942	2.48865	0.638698	4.58468	1.24674	1.465	0.388911	0.462449
61	49.7468	2.4641	0.638366	4.52557	1.22951	1.46589	0.384702	0.459168
60.2	49.3041	2.70106	0.625592	5.07982	1.30085	1.49162	0.375953	0.45699
63.5	51.0525	2.13861	0.653108	3.9324	1.14666	1.4331	0.393433	0.463704
62	47.6159	2.52524	0.638439	4.53656	1.25245	1.46893	0.393878	0.466439
62.5	49.8631	2.56277	0.647665	4.70894	1.23694	1.44475	0.39998	0.469791
59.1	50.807	2.56561	0.641057	4.80682	1.24421	1.45442	0.387451	0.461561
61.6	49.6738	2.56454	0.639643	4.59149	1.24529	1.46198	0.388592	0.461772
64.1	50.173	2.62574	0.63392	4.8055	1.27015	1.47093	0.383125	0.460362
60.7	48.7219	2.64068	0.64675	4.87283	1.23215	1.44546	0.396298	0.465972
62.2	49.0965	2.49673	0.633029	4.67276	1.27196	1.47163	0.387223	0.463738
63.6	51.177	2.20337	0.651915	3.93373	1.15426	1.43889	0.393798	0.464374
59.1	50.2991	2.37986	0.646327	4.4159	1.21806	1.44727	0.396422	0.468552
58.4	52.0886	2.35927	0.651053	4.2423	1.17189	1.43934	0.39125	0.463524
63.4	51.4681	2.39447	0.64628	4.44166	1.20893	1.44473	0.392166	0.464747
63.5	52.7743	2.11708	0.662138	3.79985	1.11528	1.414	0.399146	0.465754
64.1	49.8172	2.63527	0.631333	4.87104	1.26595	1.47729	0.376258	0.453939
59.6	50.3328	2.34503	0.659355	4.26128	1.17063	1.41799	0.406541	0.474321
59	51.4541	2.51114	0.645936	4.50802	1.22355	1.44933	0.39342	0.462617
60.6	50.9263	2.56176	0.625897	4.6062	1.2726	1.49166	0.371183	0.450365
57.9	50.2062	2.81469	0.627603	5.28312	1.31519	1.48145	0.375902	0.453075
59.3	50.5663	2.53913	0.628389	4.68576	1.27197	1.48521	0.375459	0.454047
59.1	49.3784	2.99362	0.623272	5.65737	1.38699	1.48967	0.384165	0.460299
63.6	50.6004	2.64361	0.628105	4.90154	1.28853	1.48272	0.375204	0.45528
62.5	49.1611	2.42979	0.629853	4.48503	1.25292	1.47922	0.377395	0.457602
58.6	49.09	2.36108	0.633467	4.48368	1.25822	1.46772	0.384076	0.461073
59.9	50.8418	2.27242	0.641846	4.19778	1.20331	1.45512	0.385624	0.458924
56.1	49.9331	2.54339	0.647607	4.68098	1.2108	1.44382	0.392537	0.462787
56.3	50.0192	2.50259	0.635254	4.63877	1.24985	1.46887	0.379087	0.456283
56.6	50.0292	2.47035	0.6334	4.44458	1.23632	1.47837	0.375464	0.453315
58.1	49.1006	2.54226	0.637116	4.66386	1.25619	1.46505	0.387775	0.46261
60.3	48.2404	2.54471	0.64205	4.64599	1.22689	1.45881	0.387932	0.461825
61.2	51.1851	2.27782	0.642663	4.09641	1.18458	1.45657	0.382827	0.457096
57.7	50.3539	2.47085	0.63281	4.53262	1.25517	1.47301	0.379997	0.455712
57.8	51.2536	2.46553	0.639009	4.47838	1.22287	1.46471	0.380855	0.455625
62.2	52.7417	2.17697	0.655119	3.9093	1.13434	1.42998	0.391341	0.462486
56.7	49.3856	2.51961	0.632045	4.65817	1.26953	1.47012	0.38	0.457758
57.7	50.0783	2.41033	0.639341	4.27556	1.21164	1.46344	0.381849	0.45746
58.3	50.892	2.26371	0.64963	4.07929	1.16029	1.44136	0.387654	0.459709
60.7	51.5553	2.40869	0.658574	4.23623	1.1664	1.4309	0.405179	0.469255
56.7	49.6663	2.53997	0.626655	4.6185	1.27198	1.48994	0.373411	0.451946
58.6	50.7788	2.48104	0.642784	4.62646	1.22481	1.44699	0.384676	0.459133
54.9	49.5858	2.39417	0.643804	4.31675	1.19996	1.45562	0.385594	0.460686
58.8	51.0314	1.92716	0.654047	3.56051	1.11323	1.42711	0.390521	0.462306
59.4	48.5926	3.82412	0.621045	7.30497	1.49585	1.49282	0.386406	0.462214
52.1	48.0372	3.44849	0.620982	6.52867	1.45117	1.4931	0.38345	0.458659
57.2	47.1867	3.38647	0.611749	6.51869	1.47932	1.51581	0.37705	0.456901
49	49.237	3.17565	0.621413	6.01137	1.3866	1.49611	0.375752	0.455198
56.3	47.5377	3.3722	0.615039	6.44927	1.47389	1.50621	0.383066	0.461031
64.2	48.0847	3.10226	0.610477	6.02379	1.43879	1.51296	0.370946	0.45369
52.2	47.901	3.58247	0.615571	6.85582	1.47759	1.50224	0.378059	0.457089
47.4	48.5098	3.20907	0.624614	6.01442	1.4096	1.48682	0.386705	0.460377
50.7	47.1971	3.31162	0.617149	6.28513	1.44687	1.50188	0.381149	0.458182
50.4	48.8831	3.12019	0.632432	6.01358	1.37415	1.46652	0.390275	0.463939
52.2	46.2269	3.21958	0.618942	6.20158	1.44602	1.49691	0.388132	0.465713
50.8	49.1546	3.15276	0.624813	5.98167	1.40559	1.48219	0.38687	0.461589
44.1	47.2149	3.48046	0.614025	6.72316	1.48652	1.50622	0.38215	0.459266
45.3	48.2645	3.47001	0.617128	6.44589	1.46833	1.50321	0.382703	0.458552
43.8	46.5933	3.20746	0.629535	5.96097	1.40121	1.47772	0.395928	0.467672
55.1	48.2077	3.58456	0.624454	6.65413	1.439	1.48344	0.386376	0.463486
46.7	51.155	3.26885	0.612379	6.35495	1.4462	1.51278	0.368266	0.450695
48.1	49.2872	3.78396	0.598033	7.27003	1.57471	1.54142	0.367209	0.450588
63.2	49.6183	3.53712	0.616927	6.62987	1.47444	1.50396	0.383753	0.460025
55	49.2522	3.1235	0.623687	5.87975	1.37927	1.48956	0.378057	0.455094
57.6	51.0845	3.05953	0.61835	5.69631	1.38423	1.50251	0.372616	0.451731
48.5	49.8692	3.18853	0.620701	5.92173	1.404	1.49637	0.379322	0.457034
56.8	48.8727	3.55898	0.613306	6.82553	1.49488	1.50628	0.378862	0.458815
47.7	49.6018	3.45127	0.607113	6.51805	1.49271	1.52558	0.370406	0.452697
47.8	47.7058	3.46835	0.608816	6.59349	1.50095	1.52135	0.376646	0.457984
56.1	48.0303	3.34723	0.613483	6.44663	1.46289	1.50428	0.376086	0.456723
52.8	49.4341	3.29804	0.605453	6.36277	1.47341	1.52378	0.364641	0.450914
54.1	49.3281	3.41801	0.610813	6.48505	1.48171	1.51542	0.376744	0.455521
46.1	50.3996	3.27448	0.609146	6.3056	1.4592	1.51608	0.36767	0.451483
51.9	51.3686	3.10706	0.624222	5.79627	1.38704	1.48811	0.381937	0.458073
49.2	48.1403	3.70012	0.601288	7.26393	1.57069	1.52461	0.371789	0.453365
53.5	49.8383	3.12131	0.621223	5.85357	1.37943	1.49434	0.37886	0.456965
53	49.9542	3.37584	0.602145	6.48318	1.49032	1.53386	0.363233	0.451236
58.1	48.3286	3.93386	0.586196	7.87108	1.6589	1.55972	0.359917	0.447497
52.2	48.9445	3.77766	0.594029	7.25615	1.59176	1.54861	0.365173	0.451374
51.9	49.607	3.44439	0.599465	6.68516	1.51392	1.53592	0.359923	0.448069
53.2	48.6099	3.31498	0.617184	6.24481	1.44682	1.50574	0.380632	0.458779
53.8	48.5908	3.34995	0.615148	6.35073	1.46094	1.5069	0.379657	0.458299
43.1	48.0284	3.81134	0.599776	7.35176	1.55578	1.53658	0.363046	0.450103
51.4	49.5581	3.16997	0.613933	6.11913	1.44293	1.50785	0.375678	0.455032
48.8	45.5014	3.73047	0.613496	6.84094	1.52601	1.51367	0.392283	0.46712
51.4	48.5747	3.37473	0.62367	6.37709	1.4337	1.48975	0.389319	0.464706
50.2	48.5348	3.47514	0.607765	6.68598	1.51096	1.51877	0.37696	0.457518
49.4	47.4342	3.30956	0.618734	6.15082	1.43238	1.5016	0.382153	0.458393
58.2	48.8387	3.45961	0.618239	6.63225	1.45049	1.49553	0.377016	0.457178
55.4	47.2968	3.33999	0.612917	6.41835	1.47306	1.51119	0.381898	0.459937
52.4	47.5351	3.74258	0.605268	7.30174	1.57395	1.52526	0.382001	0.462112
57.5	50.7026	2.89098	0.633062	5.43997	1.31801	1.46896	0.385607	0.45988
48.2	48.7924	3.24046	0.606701	6.33887	1.46408	1.51749	0.364907	0.451305
50.5	50.9904	3.51655	0.608575	6.68037	1.49451	1.52003	0.369588	0.452327
47	49.903	3.38564	0.611414	6.51277	1.4687	1.51599	0.373426	0.45544
53	51.7861	2.73189	0.636373	5.08954	1.27953	1.46565	0.382556	0.457215
48.5	47.5248	3.39114	0.59917	6.50069	1.50941	1.53769	0.361088	0.44865
45	48.3003	3.4667	0.620885	6.42647	1.45738	1.49704	0.386654	0.463751
46	48.5758	3.54483	0.616236	6.59128	1.45637	1.50192	0.372972	0.453045
37.3	45.3154	4.04711	0.574586	7.95324	1.69375	1.58604	0.3469	0.443341
39.5	45.0839	3.81447	0.583329	7.45287	1.63352	1.56808	0.352225	0.443779
32.7	44.6948	3.59615	0.588176	6.99109	1.56714	1.55928	0.350442	0.443146
30.6	39.4634	3.72978	0.599336	7.30093	1.59317	1.53902	0.37834	0.458141
38.4	42.2605	3.46793	0.598198	6.74357	1.5482	1.54087	0.370118	0.454374
42.8	42.2099	3.46375	0.601596	6.65053	1.51232	1.53438	0.36741	0.454653
36.7	44.0696	3.57672	0.592331	7.0988	1.58073	1.54912	0.360553	0.449883
38.1	46.1985	3.52814	0.594325	6.75687	1.54275	1.54834	0.35797	0.446373
36.6	44.4914	3.52475	0.595301	6.74549	1.53278	1.54919	0.359811	0.448011
28.9	39.7978	4.26215	0.574423	8.63094	1.74055	1.58073	0.348162	0.442069
40.7	40.7832	4.18514	0.576594	8.3258	1.71564	1.58335	0.35185	0.443733
42.9	43.0394	3.88501	0.594941	7.54858	1.60372	1.54493	0.36608	0.450358
48.1	43.7624	3.99901	0.601089	7.51913	1.57777	1.53618	0.373184	0.454512
44.1	47.5724	3.4376	0.605597	6.48844	1.4875	1.52677	0.366264	0.449537
34	47.0042	3.75229	0.596605	7.14299	1.56913	1.54385	0.362015	0.447589
42	45.9677	3.83242	0.59289	7.3061	1.58245	1.55193	0.359452	0.447207
43.7	46.7067	3.61686	0.593903	6.87952	1.54851	1.55286	0.357522	0.445457
34.1	38.3386	4.09572	0.58086	8.11878	1.70593	1.57353	0.361867	0.451378
34.3	37.4465	4.04301	0.580785	7.7152	1.66325	1.58191	0.359809	0.44939
43.3	43.5251	3.53126	0.592731	6.75974	1.55192	1.55297	0.359779	0.449234
36.7	48.0621	3.152	0.626534	5.86286	1.39037	1.48271	0.384559	0.458065
42.6	43.3247	3.72322	0.584743	7.2778	1.60814	1.56578	0.351957	0.444665
38.1	45.1723	4.10434	0.581956	8.22693	1.68443	1.56445	0.352656	0.444387
38.4	43.0943	3.86374	0.589168	7.39637	1.61425	1.56025	0.359745	0.449169
40.1	44.8306	3.28858	0.600843	6.44223	1.48925	1.5328	0.358622	0.446715
53.6	45.7213	2.44884	0.611313	4.86013	1.31735	1.55887	0.361585	0.456028
49.3	46.5397	2.27649	0.631401	4.35087	1.21461	1.515	0.375898	0.462248
41.9	44.1554	2.93524	0.600391	5.69249	1.41001	1.58089	0.353018	0.449947
38.5	45.4128	2.47743	0.607193	4.79489	1.32314	1.56899	0.358694	0.454176
45.4	44.2937	2.42225	0.612138	4.74877	1.30289	1.55067	0.358784	0.452854
44.3	45.5084	2.63409	0.602983	5.16923	1.37316	1.57358	0.357302	0.452364
48.8	44.9989	2.83692	0.615741	5.52776	1.37573	1.54219	0.374566	0.459614
37.5	45.6923	3.09068	0.619092	5.90921	1.38875	1.53502	0.380092	0.462339
45.7	43.8901	3.13543	0.616674	5.98644	1.42362	1.54107	0.385853	0.466036
49.1	47.0357	2.94228	0.618263	5.78132	1.38943	1.53274	0.379157	0.463181
43.1	44.2794	3.03234	0.607036	5.93539	1.43773	1.55525	0.371104	0.45964
45.8	46.6826	3.36144	0.597106	6.62971	1.52216	1.57675	0.365684	0.456975
40.4	44.7563	2.92859	0.607466	5.73135	1.40788	1.55924	0.368212	0.458131
41.5	43.8669	3.29124	0.601677	6.18374	1.4734	1.57474	0.368232	0.458227
39.5	44.4004	2.8515	0.620476	5.41033	1.35878	1.53452	0.383393	0.464739
51.9	47.0056	3.12842	0.619395	5.99204	1.40251	1.5299	0.38107	0.464435
46.9	48.7214	2.17491	0.607682	4.41399	1.2883	1.56167	0.35475	0.453362
49.2	48.0812	2.22922	0.614291	4.35891	1.26632	1.55298	0.362184	0.456374
50.2	47.533	3.3619	0.599933	6.39161	1.47874	1.58136	0.359563	0.451284
48.5	46.6059	2.59551	0.610357	4.8917	1.32819	1.55863	0.36144	0.452748
49	46.4031	2.63009	0.603659	5.07699	1.3504	1.57556	0.353606	0.452157
50.5	46.2429	3.11085	0.594627	5.96732	1.45319	1.59056	0.350435	0.449621
40.3	43.8336	3.46235	0.583791	6.87936	1.56255	1.613	0.347302	0.446721
35.2	44.605	3.57318	0.5807	7.01322	1.5789	1.62216	0.344088	0.447099
40.8	42.9823	3.72506	0.590898	7.21943	1.58938	1.59676	0.365303	0.457443
36.1	43.6703	3.78794	0.59061	7.44394	1.59919	1.59569	0.363456	0.455643
42.9	47.6435	3.29954	0.588855	6.6066	1.5285	1.59913	0.353492	0.452508
43.9	47.4147	3.49059	0.589153	6.93949	1.56334	1.59826	0.359292	0.453077
45.2	47.9257	3.20828	0.588387	6.36805	1.50774	1.5989	0.349009	0.450782
43	49.189	2.64268	0.621324	4.94831	1.31892	1.53787	0.380683	0.464179
37.5	45.5789	3.61182	0.591012	7.2118	1.57879	1.58936	0.363211	0.455195
44.7	46.8674	3.2018	0.597162	6.18479	1.46647	1.5812	0.358419	0.453166
47.6	47.8002	2.36816	0.597084	4.71433	1.34075	1.58515	0.345162	0.450811
42.2	45.7614	2.48948	0.591654	5.12924	1.398	1.59759	0.347894	0.45327
42.2	46.5621	2.61666	0.593618	5.28904	1.39491	1.59283	0.346021	0.449947
45.4	47.0106	2.5322	0.597316	5.08248	1.37353	1.58911	0.347287	0.451179
51.4	46.0057	2.50913	0.614673	4.8547	1.31042	1.55276	0.364969	0.45614
45.7	44.22	2.92876	0.601822	5.6733	1.41963	1.57216	0.358024	0.451325
39.2	45.0662	3.10469	0.600099	6.06701	1.45541	1.57546	0.3614	0.453021
45.9	47.0194	2.99972	0.605816	5.92825	1.42669	1.55976	0.366575	0.455819
44.6	41.0579	3.54688	0.599568	6.65952	1.51899	1.57714	0.37496	0.459547
41.3	45.9207	3.2378	0.6062	6.32562	1.46667	1.56058	0.371341	0.458899
40.6	45.1744	3.91572	0.577884	7.88196	1.65752	1.61723	0.351072	0.450503
43.8	43.7304	3.75546	0.591103	7.26201	1.59133	1.59551	0.365565	0.456561
49.7	47.1893	3.18274	0.603162	6.22287	1.46159	1.56428	0.365422	0.457509
47.3	44.7122	3.21111	0.600243	6.24274	1.47833	1.57997	0.371151	0.459753
43.7	45.2799	3.5547	0.588745	7.0359	1.58192	1.60023	0.368018	0.461076
47.6	48.3957	3.12665	0.611508	6.05531	1.40953	1.55388	0.368743	0.457004
37.7	44.3733	2.50612	0.587378	5.15004	1.40349	1.60969	0.340162	0.448278
47.5	48.3121	2.26824	0.612187	4.41488	1.27425	1.55927	0.360783	0.45717
41.5	46.005	2.44734	0.604981	4.90158	1.33392	1.57181	0.354179	0.453947
47.9	49.055	2.05011	0.630443	3.936	1.18387	1.51838	0.368218	0.457362
42.8	43.0578	2.94323	0.596939	5.78928	1.43099	1.58924	0.355482	0.451812
39.4	45.932	3.37286	0.590291	6.55752	1.52365	1.5982	0.353131	0.453036
35	43.5893	3.7905	0.58137	7.33996	1.61337	1.61711	0.351605	0.449972
18.3	38.9075	4.04064	0.552175	8.30432	1.76751	1.67694	0.329551	0.442942
31.5	37.7465	3.90599	0.568057	7.86462	1.70916	1.64607	0.351038	0.449928
25.9	37.2182	3.43212	0.577099	6.88646	1.59766	1.62145	0.350809	0.449045
19.6	32.8499	3.49747	0.601884	7.08563	1.5454	1.56714	0.377567	0.458271
25	35.458	3.46406	0.59165	6.99311	1.5749	1.5891	0.370145	0.457132
28.7	35.9793	3.34471	0.586111	6.82026	1.5615	1.60241	0.356302	0.453149
31.6	37.5813	3.28877	0.588296	6.67936	1.56116	1.59855	0.366705	0.457921
29.5	39.2534	3.39904	0.587503	6.59984	1.55284	1.60573	0.36486	0.456237
27	39.1458	3.23029	0.597686	6.25119	1.47929	1.57918	0.362694	0.45372
22.6	32.1789	2.44661	0.601738	4.92227	1.34456	1.5766	0.349728	0.446918
27.3	32.9053	2.66732	0.59119	5.38761	1.40922	1.5993	0.344702	0.445282
28.8	36.2964	2.58004	0.593589	5.2062	1.38715	1.5957	0.342795	0.446283
37.3	38.7746	2.26853	0.612157	4.3603	1.27161	1.55981	0.358655	0.453485
25.3	40.5627	2.66711	0.591637	5.31616	1.40218	1.59844	0.343826	0.44749
24.7	41.3209	3.48327	0.576466	6.80119	1.57966	1.62397	0.341367	0.444469
23.8	39.043	3.91446	0.562069	7.93711	1.71549	1.65575	0.339849	0.445373
26.4	38.955	3.50588	0.575053	6.86625	1.58724	1.63148	0.344034	0.448545
18.9	31.2803	2.84635	0.609484	5.62587	1.3978	1.5514	0.368473	0.454034
21.5	30.9971	3.1225	0.611575	5.97457	1.42638	1.54945	0.3786	0.457703
31.7	36.3688	4.3241	0.558351	8.56286	1.77377	1.65951	0.33846	0.445187
32.1	42.4282	3.61637	0.590119	7.04393	1.56847	1.59728	0.357932	0.452376
24.5	37.1285	4.26345	0.558909	8.71763	1.77817	1.65827	0.340594	0.44699
35.1	38.7047	3.87803	0.566409	7.99533	1.70961	1.64351	0.345992	0.447771
25.6	35.0227	4.03617	0.572977	7.97055	1.70021	1.63408	0.358679	0.453625
26.7	36.6053	3.6071	0.574657	7.26049	1.62417	1.62765	0.346864	0.447336
30	44.6669	2.41556	0.62102	4.86485	1.296	1.48241	0.363402	0.447133
43.4	45.8631	2.11058	0.630263	4.13321	1.20287	1.46831	0.362869	0.444531
39.6	42.3554	3.40919	0.590656	6.72555	1.54545	1.5471	0.356938	0.444221
30.3	44.262	1.99374	0.621298	3.91634	1.20327	1.48799	0.35273	0.439907
33.9	40.9704	3.09979	0.593119	6.34215	1.50069	1.53536	0.350707	0.44013
46.2	45.1476	2.39999	0.621615	4.71928	1.28069	1.48472	0.362909	0.447196
40.2	44.949	2.40423	0.621692	4.67287	1.2806	1.48408	0.363937	0.446724
31.4	39.9828	3.19331	0.598138	6.39191	1.50441	1.53314	0.365012	0.44832
36.3	39.1421	2.03772	0.629251	4.12093	1.20779	1.46999	0.365144	0.446296
33.5	42.762	3.09401	0.59482	6.48247	1.51042	1.53006	0.354833	0.442409
36.5	38.2684	1.95593	0.63173	3.91517	1.17539	1.46396	0.360261	0.442748
31.4	41.0011	3.28736	0.58979	6.49866	1.52128	1.54506	0.348676	0.439873
36	39.5469	2.43738	0.616084	4.85566	1.31085	1.49522	0.361454	0.445526
28.7	37.6173	2.42764	0.615269	4.59679	1.28465	1.49936	0.355682	0.441998
27.4	40.5059	3.00585	0.606295	5.67578	1.41713	1.51677	0.36507	0.448706
37.8	43.746	1.6368	0.651309	3.09214	1.05351	1.42743	0.371709	0.44961
47.7	47.2411	2.46369	0.612588	4.98124	1.33008	1.50254	0.359319	0.444868
46.3	47.6281	1.99971	0.633001	3.88844	1.17421	1.46268	0.362657	0.444102
47.8	44.0202	3.1329	0.595488	6.22726	1.48583	1.53449	0.35179	0.440077
32.8	44.7106	1.89641	0.62958	3.70507	1.16363	1.47014	0.358778	0.441693
38.5	42.258	3.23388	0.586768	6.3309	1.51617	1.55752	0.345786	0.43934
40.5	43.8176	2.93281	0.602126	5.65497	1.41292	1.52267	0.350002	0.440084
30.5	39.2214	2.38668	0.614004	4.43202	1.27178	1.50313	0.351586	0.438598
32.3	37.8116	3.47804	0.589799	6.34107	1.51623	1.55547	0.351381	0.438238
29.8	36.2151	1.9056	0.641072	3.6185	1.13115	1.44635	0.367573	0.444729
29.8	37.2885	3.22892	0.592204	6.47068	1.51137	1.54157	0.351134	0.439121
31.6	43.1919	2.48329	0.605739	5.06159	1.34487	1.51212	0.346548	0.437787
31.1	43.0697	2.7753	0.601494	5.33801	1.3879	1.52461	0.350084	0.439027
26.6	42.4412	3.16118	0.588944	6.12725	1.48955	1.54535	0.341251	0.435602
39.6	48.3147	2.05101	0.627442	3.84005	1.18377	1.47805	0.358439	0.44321
25.8	41.9056	3.49706	0.583117	7.07418	1.57955	1.55544	0.343972	0.437498
28.6	41.357	2.20491	0.616314	4.38264	1.26062	1.49308	0.351781	0.440153
45.1	46.2241	2.70631	0.603732	5.0943	1.35599	1.52588	0.344979	0.438365
34.5	41.8092	2.53717	0.604606	4.9116	1.33102	1.52205	0.343782	0.435535
42	43.2963	3.84317	0.571623	7.51452	1.65603	1.58011	0.337804	0.435527
32.3	45.6155	2.19535	0.613461	4.29828	1.25797	1.50429	0.347401	0.436902
44.6	43.4852	3.12289	0.592464	6.16858	1.48944	1.54305	0.349684	0.439287
36.2	39.796	3.04708	0.596903	6.08847	1.46227	1.53165	0.350232	0.439721
32.4	43.1836	2.27435	0.613598	4.28629	1.25403	1.50501	0.348014	0.436452
39.8	42.6624	3.32553	0.584716	6.45628	1.53714	1.56038	0.345328	0.437759
32.8	37.4256	2.07326	0.633318	3.9612	1.17948	1.46154	0.365019	0.444061
33.5	41.5938	2.95573	0.60005	6.07674	1.46123	1.52522	0.355006	0.442961
37.3	38.4739	2.5704	0.613038	5.10085	1.33882	1.4969	0.357611	0.441982
24.3	37.5039	2.43391	0.616256	4.51291	1.27345	1.50097	0.354075	0.440603
36.5	43.3691	3.22225	0.590539	6.1185	1.48884	1.54715	0.346407	0.438004
37.6	40.5653	2.03774	0.622766	3.97428	1.20641	1.48203	0.355167	0.440402
36	40.9375	3.23102	0.588766	6.60391	1.53266	1.54408	0.349325	0.439203
43.1	44.8659	2.03663	0.635074	3.93687	1.17041	1.45745	0.363127	0.444392
20.9	37.6413	2.90863	0.59331	5.84071	1.45531	1.53633	0.347172	0.437523
40.8	47.6356	2.12861	0.627582	4.04675	1.19821	1.47732	0.358006	0.442816
28.9	41.7853	3.52474	0.579658	7.16845	1.59794	1.56747	0.342117	0.436202
34.6	48.4406	1.92211	0.630868	3.59567	1.14944	1.47503	0.358155	0.441801
28.1	36.6513	3.48592	0.58182	6.31943	1.52327	1.56961	0.337671	0.43406
32.6	38.293	3.30806	0.596215	6.12569	1.47213	1.53819	0.351821	0.44201
22.4	34.4094	2.26277	0.624631	4.12143	1.21284	1.48266	0.354555	0.438621
25.7	33.4312	2.9791	0.597958	5.66952	1.42073	1.53138	0.344807	0.433942
24.6	33.3203	1.82963	0.639357	3.47628	1.11647	1.44784	0.361937	0.440557
17.6	33.0517	2.76126	0.606162	5.43243	1.38332	1.51166	0.354513	0.43776
19.9	32.0376	1.94132	0.647567	3.77637	1.13718	1.42982	0.380074	0.453335
23.3	32.2951	1.84581	0.645571	3.40805	1.10184	1.43707	0.371253	0.446442
22.1	32.5055	2.56269	0.613111	4.78885	1.307	1.50547	0.354542	0.437323
23.4	33.1658	1.75666	0.647639	3.30094	1.08094	1.43078	0.366622	0.443283
24	33.4377	3.18769	0.589417	6.31734	1.49683	1.54652	0.343132	0.433832
21.2	33.8473	2.2295	0.641943	4.08598	1.17541	1.44513	0.376729	0.450859
18.9	32.4029	2.07446	0.635508	4.06403	1.1848	1.44933	0.366431	0.443773
23.6	32.4383	1.53653	0.660256	2.88209	1.01487	1.40605	0.376221	0.449711
23.8	33.5445	2.37497	0.622235	4.75669	1.28273	1.4793	0.362498	0.442389
24.3	35.4773	1.66357	0.658902	3.19236	1.05143	1.4043	0.382043	0.454265
23.5	34.4739	3.40557	0.57697	7.22481	1.60139	1.56156	0.335174	0.430546
24.5	34.0868	2.98273	0.605926	5.99984	1.42215	1.51302	0.353419	0.438006
22.1	33.26	2.02139	0.630731	3.90528	1.17785	1.46486	0.358667	0.43993
24.6	32.8652	3.04688	0.602839	5.95849	1.43054	1.52124	0.35373	0.437047
22.1	32.1718	1.37206	0.674498	2.54254	0.948565	1.3717	0.385886	0.454581
21.7	32.1165	2.21596	0.615805	4.48489	1.26959	1.49206	0.352527	0.435746
22.9	31.9346	2.27807	0.623956	4.44837	1.2452	1.47961	0.359542	0.440121
23.9	33.6248	2.4754	0.605551	4.8253	1.32701	1.51828	0.345887	0.436144
19.3	33.3949	2.96725	0.593917	6.16103	1.47242	1.53404	0.344842	0.434527
21.9	33.3504	1.92773	0.630682	3.81114	1.16656	1.46428	0.355767	0.43914
22.7	32.0679	2.76094	0.605288	5.34113	1.37639	1.5194	0.351998	0.43798
20.7	32.335	2.38929	0.628704	4.54887	1.2526	1.47061	0.370044	0.44793
31.2	39.5522	3.51028	0.621745	6.46489	1.48239	1.51724	0.410414	0.478638
29.6	41.506	1.92898	0.641827	3.67231	1.14438	1.4739	0.379984	0.460274
24.8	36.064	3.62391	0.610112	7.09756	1.53357	1.53082	0.391112	0.462981
26.7	37.3279	3.30722	0.603124	6.51626	1.50347	1.55504	0.379375	0.461822
29.8	35.571	2.4236	0.630461	4.50023	1.25307	1.49045	0.380025	0.460403
32.4	39.6998	3.20777	0.607327	6.09691	1.4575	1.53882	0.377264	0.461028
27.3	40.1352	1.84233	0.644085	3.60159	1.13547	1.46534	0.384987	0.463953
19.8	33.5726	3.89584	0.600867	8.61213	1.68365	1.54721	0.396451	0.468595
23.5	33.586	2.73006	0.631682	5.65936	1.3605	1.49082	0.40098	0.472111
23.8	37.3805	3.25945	0.599778	6.95707	1.52837	1.5417	0.363319	0.451549
19.9	33.2824	3.2903	0.613045	7.10161	1.51218	1.51831	0.384934	0.460279
25.6	35.2095	2.27585	0.62289	4.42223	1.24966	1.50576	0.363759	0.44968
25.5	34.4728	3.01131	0.619291	5.91714	1.4056	1.50891	0.385297	0.458932
18.1	33.249	1.91642	0.643766	3.83742	1.14734	1.4537	0.378936	0.455255
23.8	36.6531	2.85387	0.61736	5.84527	1.39524	1.50817	0.376156	0.456246
32.4	38.2132	2.31751	0.628137	4.58442	1.26687	1.49128	0.379987	0.460967
40.2	42.6774	3.70809	0.588556	7.82023	1.64125	1.56431	0.364979	0.454297
32.4	42.0405	2.02717	0.617318	4.06044	1.22857	1.51122	0.354672	0.44746
27.7	37.0093	3.60535	0.596324	7.18859	1.56998	1.55414	0.3685	0.451384
34.3	37.0148	2.9122	0.611916	5.74376	1.40233	1.52452	0.370655	0.453357
23.3	34.2859	2.96288	0.60328	6.02812	1.44049	1.53713	0.361743	0.449546
26.4	36.3706	3.62568	0.603915	7.20749	1.53477	1.54042	0.370298	0.453234
18.4	33.2757	2.25544	0.651147	4.28456	1.17635	1.43952	0.39308	0.46554
24.5	32.759	3.32873	0.608967	6.65585	1.49077	1.52355	0.376148	0.455287
16	32.2259	2.69814	0.628615	5.72535	1.36967	1.47943	0.390128	0.4636
15.8	32.6698	2.72257	0.629122	5.74658	1.35505	1.47789	0.384602	0.457692
26.9	35.0188	3.91228	0.57911	8.29818	1.68036	1.58358	0.351033	0.444317
31.2	37.3622	2.22473	0.621962	4.37518	1.24777	1.50421	0.36434	0.450135
18	34.6736	3.15742	0.593374	6.45179	1.50989	1.55807	0.3586	0.447274
31.1	42.5477	2.66708	0.604205	5.18714	1.36772	1.54654	0.356387	0.448437
26.2	36.195	2.64245	0.618562	5.37407	1.35063	1.50918	0.371619	0.453031
29.3	34.7058	2.80037	0.610057	5.8686	1.40927	1.52138	0.365862	0.450064
34.8	40.4344	4.12902	0.570818	8.11949	1.7015	1.60816	0.343007	0.443217
27.7	34.7289	2.23149	0.614203	4.26737	1.25175	1.5241	0.352222	0.443914
25.1	35.6176	3.90069	0.579621	7.90115	1.67378	1.59032	0.360368	0.44824
26.6	36.731	3.69572	0.58999	7.47844	1.60875	1.57172	0.369007	0.454301
31.2	37.3228	2.34327	0.62259	4.42955	1.25619	1.50858	0.366285	0.452203
19.5	33.1687	3.0958	0.623529	5.99174	1.40168	1.49956	0.389476	0.46286
28.5	36.2385	2.2247	0.622143	4.27894	1.23968	1.50979	0.362973	0.44854
28.7	35.7	3.56805	0.59263	6.94408	1.55514	1.55986	0.36194	0.449426
16.8	32.7589	2.96279	0.635122	5.61407	1.34432	1.47632	0.39842	0.466141
22.5	35.2149	2.48346	0.629412	4.90902	1.29272	1.48968	0.384948	0.462002
19.1	32.8741	3.26561	0.626572	6.31954	1.41914	1.49083	0.391603	0.462656
13.8	32.8183	2.27753	0.650926	4.22746	1.17326	1.44284	0.393734	0.466204
31.2	37.5325	3.40305	0.598057	6.7083	1.53079	1.55124	0.370737	0.455292
25	34.5039	2.77655	0.630444	5.2465	1.31948	1.48987	0.388569	0.462487
27.6	35.5389	2.41115	0.620576	4.71694	1.29218	1.50897	0.371353	0.455389
28.9	38.3535	3.12939	0.608988	6.34608	1.46686	1.52998	0.37531	0.456862
13.7	33.8887	3.29891	0.588042	6.85809	1.54788	1.57067	0.350238	0.4425
37.7	42.7922	2.02937	0.622906	3.92616	1.20311	1.5101	0.35917	0.450819
