# Supplementary material for: Estimation of maize LCC and FVC for full growth periods based on UAV remote sensing and ensemble learning
Source: PeerJ journal article supplement (doi:10.7717/peerj-cs.3356), 2025-11-04
Supplement: lcc_vi.xlsx [file lcc_vi.xlsx]

## Sheet: Sheet1
48.8	0.416984	0.262181	0.244911	0.498883	0.318947
56.3	0.434489	0.263258	0.24074	0.51129	0.324993
69.1	0.415527	0.255274	0.235458	0.485897	0.303618
53.4	0.422933	0.258056	0.237882	0.506762	0.320041
50	0.406248	0.253802	0.239888	0.48783	0.308737
46.4	0.404068	0.253745	0.242373	0.477615	0.303918
48.7	0.38103	0.245579	0.230865	0.439915	0.29411
56.6	0.387957	0.247969	0.234643	0.460561	0.301691
48.8	0.384434	0.248077	0.235788	0.452839	0.29629
46.7	0.383517	0.252616	0.23945	0.437804	0.29172
51.3	0.34545	0.250139	0.241206	0.3896	0.272
42.5	0.375362	0.254109	0.246376	0.442186	0.298405
51.2	0.375252	0.243891	0.232061	0.43945	0.289821
48.1	0.364609	0.241928	0.232019	0.420077	0.283338
50.3	0.40649	0.247323	0.233476	0.483745	0.308935
48.9	0.401422	0.258446	0.241293	0.470015	0.303017
48	0.397994	0.257771	0.246483	0.470839	0.310181
52.6	0.421775	0.264654	0.244574	0.490972	0.316135
53.3	0.455837	0.265583	0.238373	0.536273	0.320244
51.4	0.460776	0.263826	0.240114	0.546685	0.326455
53.9	0.454748	0.263722	0.240679	0.539089	0.330936
54	0.431283	0.262674	0.240259	0.504547	0.315304
53.4	0.44552	0.259129	0.232921	0.527994	0.323523
47	0.410928	0.247975	0.230817	0.49921	0.326384
50.5	0.427067	0.253187	0.233667	0.506404	0.320214
51.6	0.437613	0.260156	0.240393	0.517077	0.316248
53	0.422313	0.259844	0.243357	0.497948	0.309772
52.3	0.412817	0.254743	0.237557	0.479181	0.306682
57.6	0.42771	0.256173	0.236397	0.502942	0.318616
54.1	0.417634	0.253002	0.2338	0.493197	0.31133
50.7	0.427657	0.255115	0.236033	0.510569	0.323217
48.7	0.429835	0.261315	0.239375	0.50247	0.311224
47.4	0.43297	0.265949	0.247869	0.51599	0.319802
51.7	0.428138	0.262064	0.240623	0.496413	0.316745
50.5	0.440273	0.262112	0.237808	0.526417	0.322612
46.4	0.436314	0.265434	0.243905	0.517506	0.318154
47.8	0.437742	0.259829	0.238141	0.520887	0.324325
40.4	0.362024	0.253844	0.243269	0.420172	0.288488
43.2	0.398119	0.247789	0.233062	0.474735	0.303035
44	0.388784	0.246184	0.230894	0.457335	0.296933
42.8	0.388956	0.24753	0.234745	0.459244	0.299424
50.5	0.441604	0.260919	0.24011	0.525512	0.313551
44	0.384069	0.252777	0.239761	0.448078	0.290764
44.6	0.420493	0.255531	0.241703	0.505057	0.319063
54.9	0.420269	0.251023	0.236258	0.50211	0.317401
51.5	0.417095	0.250773	0.233861	0.492124	0.312852
49.8	0.432609	0.258131	0.239558	0.513993	0.322634
44.5	0.402366	0.250442	0.233052	0.469667	0.302922
45.8	0.423785	0.259758	0.242358	0.513742	0.332409
48	0.420533	0.262898	0.242719	0.506871	0.321326
54.1	0.534864	0.292509	0.247074	0.65175	0.351012
47.5	0.569322	0.313419	0.251511	0.685203	0.355714
51.2	0.55353	0.311436	0.252769	0.669392	0.348411
47	0.536182	0.292332	0.247822	0.66149	0.352531
49.7	0.501221	0.283933	0.248798	0.612705	0.338917
47.8	0.532799	0.296515	0.252862	0.653662	0.348796
46.2	0.508031	0.28931	0.246862	0.623603	0.343278
44.1	0.520147	0.290463	0.250354	0.64716	0.350673
46.4	0.518638	0.282938	0.244602	0.641434	0.355123
45.7	0.49178	0.276982	0.247532	0.609428	0.332303
50	0.534208	0.297941	0.248455	0.652154	0.333867
49	0.552693	0.301496	0.252734	0.68169	0.353107
45.1	0.507341	0.286075	0.248677	0.633407	0.344617
49.1	0.517894	0.292238	0.251163	0.63416	0.345208
45.8	0.516481	0.294688	0.246621	0.632034	0.343507
50.3	0.506566	0.293279	0.251886	0.620244	0.344207
51.7	0.592153	0.316379	0.257091	0.720622	0.36336
46.4	0.587341	0.316825	0.255452	0.705753	0.359801
50.7	0.564718	0.315639	0.253869	0.681507	0.349297
51.9	0.580295	0.319807	0.256485	0.70111	0.352867
49.7	0.594169	0.319262	0.254882	0.7203	0.363759
47.9	0.587163	0.323153	0.260308	0.703714	0.360099
47.3	0.596437	0.321774	0.256918	0.723152	0.362115
45.2	0.607359	0.321043	0.255877	0.741933	0.373774
50.2	0.569222	0.306023	0.250739	0.685466	0.3613
49.3	0.571038	0.309421	0.25499	0.687735	0.358667
45.1	0.601526	0.334479	0.262648	0.716149	0.357479
50.6	0.602172	0.327815	0.259388	0.732323	0.361698
52.8	0.600162	0.332784	0.263227	0.714224	0.35696
49.6	0.595993	0.326442	0.261417	0.713382	0.368424
51.4	0.558979	0.310245	0.256119	0.679866	0.350139
47.3	0.577765	0.318373	0.256903	0.700904	0.367073
51.5	0.582159	0.323799	0.259368	0.700357	0.354508
47.7	0.572806	0.325481	0.263182	0.681893	0.351873
49.1	0.559785	0.301662	0.250014	0.69264	0.353341
45.3	0.543663	0.297981	0.252024	0.673495	0.354946
53.1	0.545854	0.296008	0.24762	0.660869	0.346487
45.6	0.545846	0.294211	0.247774	0.668382	0.352492
46.4	0.53872	0.299087	0.248232	0.649777	0.346736
51.3	0.544046	0.297692	0.248767	0.660704	0.345187
49.3	0.490354	0.284554	0.246721	0.591432	0.329649
44.7	0.516688	0.283969	0.247062	0.633395	0.341684
43.4	0.546967	0.297514	0.25122	0.673949	0.351047
47.2	0.53796	0.293246	0.248852	0.659833	0.347545
49.5	0.557677	0.303056	0.25152	0.671886	0.352231
48.2	0.535734	0.297625	0.250052	0.651469	0.347693
49.3	0.547999	0.309025	0.258073	0.663556	0.344104
49.4	0.579336	0.318523	0.254596	0.701333	0.368612
51.2	0.624647	0.344335	0.267193	0.75189	0.363206
49.1	0.622364	0.33294	0.26694	0.762015	0.378183
48.8	0.622417	0.337365	0.264556	0.756702	0.373821
49.8	0.603811	0.335256	0.263894	0.727062	0.365499
46.7	0.615724	0.333391	0.259744	0.741994	0.35951
47.8	0.551825	0.303052	0.254891	0.680945	0.362016
47.6	0.602673	0.326381	0.257852	0.734557	0.358584
49	0.606397	0.324037	0.256494	0.733804	0.362453
50.6	0.590534	0.319661	0.254381	0.71021	0.358535
52	0.58084	0.310084	0.252287	0.699917	0.353076
53.9	0.593683	0.326531	0.259592	0.712864	0.360766
47.6	0.60222	0.319703	0.256823	0.736234	0.364924
47.5	0.58627	0.314171	0.254475	0.709806	0.35971
44.5	0.571344	0.30506	0.249129	0.691775	0.358234
48.7	0.59274	0.317722	0.257978	0.721354	0.360529
51.7	0.557	0.306014	0.248852	0.678474	0.365809
43.6	0.601359	0.314006	0.254261	0.739099	0.373984
45.6	0.594993	0.318892	0.257311	0.72823	0.358386
51.2	0.583077	0.316713	0.255158	0.708143	0.36872
50.8	0.495717	0.291618	0.25214	0.602947	0.336116
45.4	0.570907	0.299965	0.246692	0.704486	0.351486
47.6	0.548982	0.297366	0.24765	0.667874	0.351913
49.5	0.569701	0.306696	0.253051	0.695871	0.347131
51.3	0.624929	0.328731	0.256877	0.763925	0.368659
45.8	0.552184	0.298931	0.255004	0.681357	0.352718
48.8	0.586688	0.302171	0.249067	0.725716	0.363064
51.6	0.591811	0.315142	0.256389	0.721055	0.365827
49.1	0.595843	0.31835	0.255642	0.734213	0.360787
46	0.580125	0.314084	0.256529	0.702295	0.36253
48	0.568527	0.302917	0.250244	0.701345	0.3525
48.5	0.57422	0.30262	0.251259	0.711325	0.363255
47	0.578689	0.306788	0.248859	0.716845	0.376369
51.6	0.626344	0.347095	0.264157	0.739413	0.388737
57.1	0.639664	0.359608	0.273161	0.752881	0.401191
62	0.629333	0.358645	0.273408	0.745583	0.392093
45.6	0.619776	0.344383	0.263066	0.746464	0.391747
52.3	0.593789	0.327842	0.25605	0.718694	0.375324
48.1	0.61911	0.340768	0.260145	0.741721	0.3881
53.3	0.59747	0.33569	0.257171	0.718388	0.381542
50.8	0.625125	0.338153	0.258411	0.755249	0.394455
50.6	0.604348	0.330155	0.255193	0.7278	0.390317
54.3	0.592515	0.314133	0.251903	0.724162	0.385704
54.4	0.621368	0.342927	0.264883	0.740597	0.38785
52.6	0.652663	0.356946	0.26518	0.784072	0.401462
49.1	0.591196	0.319715	0.253797	0.727055	0.385898
50.1	0.612616	0.327051	0.2546	0.743771	0.39219
45.7	0.58155	0.327007	0.255599	0.704826	0.391056
52.8	0.594428	0.326466	0.253659	0.724127	0.38818
53.8	0.689833	0.379013	0.279498	0.808212	0.419354
54.2	0.686437	0.381154	0.282839	0.800251	0.408911
49.6	0.664454	0.376079	0.279676	0.777841	0.398302
56	0.671504	0.379967	0.281951	0.786387	0.394257
58.2	0.68659	0.384233	0.281913	0.802624	0.413706
53.4	0.701309	0.397314	0.293415	0.807178	0.424739
51.7	0.689368	0.387061	0.286248	0.798235	0.421362
56.6	0.709081	0.398784	0.289913	0.824992	0.4177
56	0.659202	0.366028	0.27573	0.766725	0.402692
50.9	0.672275	0.36967	0.275787	0.784299	0.401844
52.3	0.685291	0.392094	0.292982	0.789836	0.408942
54.7	0.683018	0.384496	0.283806	0.803671	0.407649
53	0.668137	0.373017	0.281271	0.784266	0.404582
48.2	0.667936	0.365833	0.276349	0.792128	0.410912
48.3	0.626869	0.340136	0.263188	0.753057	0.398412
55.9	0.669959	0.372341	0.274839	0.79093	0.409333
54.2	0.672782	0.378174	0.284427	0.789296	0.396595
51.5	0.650669	0.371626	0.285131	0.758647	0.386059
52.9	0.648476	0.353379	0.266418	0.776944	0.399463
48.8	0.642532	0.34524	0.264669	0.770729	0.399716
55.1	0.640324	0.348648	0.264883	0.751783	0.389992
51.5	0.658388	0.356215	0.267489	0.773982	0.40084
51.3	0.628943	0.353476	0.270549	0.729191	0.387002
52.4	0.669527	0.370376	0.274702	0.78573	0.402856
54.3	0.573827	0.336357	0.264509	0.659936	0.377691
51.7	0.605388	0.334876	0.258125	0.717929	0.393601
53.2	0.648006	0.351819	0.267484	0.765942	0.398084
51.8	0.641133	0.347034	0.26318	0.756669	0.391844
54.3	0.63963	0.348898	0.263903	0.75319	0.396724
49.7	0.617024	0.342366	0.26295	0.72433	0.392815
50.5	0.623817	0.345283	0.267462	0.732922	0.391577
52.6	0.672094	0.379147	0.280513	0.782766	0.41293
57.1	0.696782	0.396465	0.292853	0.816376	0.408085
53.3	0.700728	0.394219	0.288115	0.823285	0.421603
56.3	0.698879	0.40297	0.294546	0.819025	0.412602
53.5	0.697371	0.400596	0.292558	0.818408	0.414061
49.8	0.681116	0.388063	0.288952	0.792558	0.397887
51.8	0.650915	0.350188	0.269011	0.77601	0.402639
50.1	0.678845	0.379913	0.279424	0.794751	0.405043
51	0.69057	0.386176	0.283833	0.806155	0.395411
56.4	0.655502	0.372008	0.280671	0.755519	0.389338
54.3	0.657198	0.363622	0.273367	0.763698	0.393455
58.4	0.661493	0.378251	0.284334	0.762691	0.403388
51.8	0.681119	0.375314	0.27564	0.802565	0.408939
52.7	0.649522	0.350264	0.264004	0.769537	0.399601
48.7	0.634653	0.336991	0.259126	0.749443	0.393286
53.4	0.65296	0.348784	0.261942	0.778062	0.399507
56.7	0.62578	0.351819	0.265344	0.732911	0.399105
53.3	0.66248	0.355667	0.26488	0.782937	0.405277
56.7	0.658964	0.361485	0.270263	0.780265	0.396096
54.1	0.645652	0.357201	0.268302	0.760826	0.393758
53.8	0.574184	0.325294	0.258016	0.671949	0.373554
49.6	0.64286	0.342845	0.259469	0.762362	0.398249
50.3	0.621074	0.334564	0.258577	0.746857	0.365615
50.1	0.628532	0.339655	0.260687	0.756858	0.372437
53.6	0.69253	0.386648	0.28309	0.816049	0.400007
51.4	0.630892	0.34221	0.263125	0.747698	0.391911
51.2	0.658438	0.348567	0.259924	0.783774	0.405155
56.3	0.673835	0.373931	0.276233	0.791485	0.405869
51.6	0.682059	0.376735	0.274991	0.808086	0.418038
50.4	0.646459	0.353908	0.265963	0.762637	0.399463
49.3	0.635217	0.336069	0.25782	0.758808	0.396579
52.7	0.621426	0.322844	0.252689	0.751786	0.399315
48.9	0.639069	0.341388	0.257595	0.766069	0.404205
60.3	0.676811	0.393015	0.290996	0.782314	0.390829
58.2	0.691175	0.401515	0.296944	0.790764	0.407924
56.4	0.663072	0.387834	0.287104	0.766425	0.405668
47.6	0.677939	0.391388	0.287285	0.789769	0.412829
50.6	0.652277	0.368516	0.275712	0.758542	0.401197
53.7	0.676427	0.388086	0.284637	0.779503	0.41059
51.9	0.65501	0.36753	0.272346	0.761575	0.394743
49.2	0.686405	0.393026	0.28534	0.798424	0.416225
51.7	0.675538	0.392102	0.288287	0.779329	0.413669
47.4	0.641222	0.351711	0.262424	0.766204	0.384732
56.2	0.639822	0.368644	0.275789	0.747458	0.354109
56.1	0.686711	0.395851	0.288497	0.802301	0.390956
47.4	0.659264	0.36826	0.273609	0.778278	0.392217
49.9	0.667788	0.376134	0.280925	0.7836	0.404559
48.5	0.636133	0.369985	0.279122	0.746524	0.391746
53.5	0.666746	0.382758	0.286007	0.780652	0.404357
56.3	0.739474	0.438836	0.317001	0.852437	0.43399
51.6	0.739416	0.437085	0.317393	0.841595	0.412523
54.6	0.712608	0.420315	0.309034	0.814544	0.411808
56.8	0.730296	0.436932	0.318408	0.831963	0.420695
57.1	0.732186	0.433486	0.315666	0.835544	0.438485
52.8	0.738102	0.438737	0.320901	0.836633	0.434489
55.7	0.727568	0.427217	0.312217	0.825875	0.427802
56.6	0.743182	0.444371	0.322455	0.844347	0.432647
55.2	0.719591	0.430851	0.316883	0.816171	0.407853
56.5	0.721555	0.426729	0.312139	0.819912	0.408805
51.9	0.742583	0.456567	0.335684	0.837232	0.410148
51.4	0.724176	0.437418	0.32027	0.829508	0.411408
52.8	0.723443	0.430067	0.315856	0.828304	0.415074
53.9	0.71784	0.420292	0.310511	0.83067	0.421531
54.5	0.680327	0.397185	0.294973	0.796215	0.405057
58.8	0.721872	0.435892	0.320053	0.828393	0.418181
55.6	0.7284	0.432322	0.314413	0.83995	0.420278
55.9	0.713772	0.425857	0.316642	0.812473	0.402692
49.6	0.680798	0.385868	0.285128	0.791987	0.410367
51.6	0.694097	0.390976	0.285893	0.809408	0.414386
54.9	0.697899	0.400582	0.294321	0.795456	0.404015
50.4	0.701662	0.397996	0.290999	0.805284	0.4186
49.9	0.68249	0.391311	0.290604	0.775125	0.396859
55.5	0.704246	0.409183	0.299119	0.80919	0.419489
53.7	0.639071	0.379804	0.287376	0.731234	0.386543
48.2	0.679332	0.39071	0.288191	0.784865	0.396347
49.5	0.69948	0.405878	0.297688	0.803129	0.396782
55.2	0.698037	0.407192	0.29872	0.802116	0.394809
53.4	0.69287	0.405005	0.29834	0.794519	0.402397
50.7	0.665662	0.387227	0.28974	0.764574	0.396105
54.2	0.680309	0.40364	0.301707	0.781273	0.398986
52.5	0.728685	0.442127	0.325602	0.831409	0.423531
53.6	0.749	0.456425	0.331078	0.859132	0.436633
56.3	0.747402	0.447761	0.323877	0.856009	0.441985
54.8	0.740588	0.452005	0.330891	0.843438	0.427475
52	0.737396	0.444816	0.322279	0.847244	0.433074
56	0.722256	0.432305	0.317488	0.817291	0.410758
51.4	0.694455	0.391215	0.285868	0.807969	0.422377
55.7	0.715293	0.413283	0.299085	0.826876	0.428779
52.2	0.711279	0.411195	0.300265	0.821973	0.417867
55	0.702039	0.421967	0.311234	0.79667	0.405447
56.8	0.691955	0.403354	0.297012	0.790423	0.414878
61.5	0.687475	0.414529	0.305933	0.793157	0.417051
58.1	0.701333	0.410007	0.30601	0.814744	0.426771
54.9	0.668052	0.375253	0.288034	0.781141	0.413855
54.7	0.660004	0.364189	0.276314	0.765825	0.409925
56.6	0.69276	0.393645	0.291443	0.80427	0.417133
57.6	0.659276	0.384031	0.289499	0.769822	0.399946
59.3	0.67787	0.38617	0.281976	0.795584	0.413673
57.3	0.67644	0.384294	0.284151	0.78897	0.412297
58.9	0.656019	0.367895	0.276256	0.757297	0.401489
54.4	0.607259	0.33889	0.26221	0.702358	0.387994
52.8	0.681484	0.380184	0.276856	0.793207	0.419389
55.3	0.670589	0.367655	0.272266	0.780271	0.408006
52.9	0.678156	0.37258	0.274452	0.792024	0.418171
54.2	0.724763	0.419322	0.303246	0.835114	0.433403
54.2	0.673777	0.378758	0.282347	0.782791	0.40994
57.3	0.676354	0.37481	0.27862	0.787666	0.421942
53.5	0.707856	0.410445	0.297999	0.81594	0.422822
55.5	0.717239	0.417968	0.302547	0.831428	0.421525
52.3	0.686763	0.393044	0.291127	0.789612	0.431069
54.3	0.686046	0.380301	0.280439	0.787317	0.450146
49.7	0.643699	0.351992	0.268817	0.762059	0.422677
53.2	0.653332	0.368734	0.280114	0.777503	0.409206
65.2	0.679408	0.408808	0.308093	0.773383	0.378819
58.3	0.686092	0.414901	0.31436	0.776137	0.374626
62.5	0.65934	0.399238	0.306355	0.751172	0.361691
54.7	0.67673	0.404371	0.307919	0.773708	0.37382
64.4	0.665508	0.396152	0.303604	0.762154	0.360644
60.6	0.689931	0.405016	0.308071	0.779714	0.363605
56.6	0.678444	0.3983	0.29964	0.77918	0.368156
59.8	0.688687	0.410184	0.30825	0.79266	0.37969
61.8	0.677234	0.412479	0.312148	0.77526	0.37283
59	0.664292	0.38808	0.29356	0.76645	0.375947
63.3	0.675787	0.405578	0.309736	0.761506	0.354638
63.7	0.701422	0.420004	0.314074	0.804073	0.382478
57	0.680066	0.404354	0.303513	0.785057	0.365831
62.7	0.679769	0.404798	0.302333	0.78326	0.369528
58.5	0.671045	0.413005	0.312698	0.76635	0.364421
63	0.696373	0.422283	0.317154	0.792043	0.378743
60.8	0.718333	0.433132	0.324331	0.81251	0.38528
62.4	0.729958	0.444857	0.334213	0.818034	0.375031
60	0.727611	0.451121	0.338057	0.817844	0.380753
62.8	0.733584	0.462211	0.34731	0.822259	0.365759
63	0.722665	0.441859	0.330621	0.815568	0.38848
65.7	0.730743	0.458978	0.344038	0.81576	0.388165
62.9	0.73086	0.456286	0.341542	0.824775	0.386075
62.2	0.735927	0.452072	0.336399	0.830913	0.390329
60.4	0.714319	0.431374	0.32233	0.809495	0.378896
62.3	0.720137	0.435185	0.32603	0.81519	0.377429
62.8	0.731444	0.45424	0.341698	0.822664	0.38142
62.1	0.73586	0.460805	0.343078	0.832814	0.38416
62.9	0.730004	0.445234	0.331947	0.833702	0.381918
58.7	0.726673	0.443851	0.331355	0.829089	0.388045
60.4	0.700312	0.423853	0.319753	0.792484	0.361859
59	0.720521	0.439321	0.328692	0.809323	0.38972
60	0.724967	0.44612	0.333481	0.824699	0.38431
63.3	0.715382	0.45444	0.346353	0.811161	0.374882
60.9	0.705796	0.423515	0.318211	0.810047	0.377474
61.1	0.708626	0.421418	0.316182	0.808586	0.375452
61.4	0.716527	0.443483	0.333272	0.805266	0.369322
60.7	0.708886	0.433042	0.325906	0.795975	0.370522
57.7	0.712055	0.428745	0.321017	0.805206	0.364007
66.5	0.727667	0.446207	0.333324	0.815305	0.380359
66.7	0.6935	0.422557	0.320326	0.784084	0.356289
59.2	0.702127	0.420823	0.315074	0.798702	0.373434
61	0.713438	0.43267	0.322325	0.811198	0.379047
62.2	0.701798	0.425591	0.317961	0.796525	0.373456
63.5	0.708237	0.428763	0.320128	0.800242	0.370758
64.2	0.699668	0.428594	0.323446	0.785503	0.368639
60.6	0.724998	0.451492	0.341528	0.809988	0.384503
62.2	0.729574	0.455943	0.343951	0.80795	0.415647
57	0.737898	0.469374	0.353951	0.828946	0.37405
62.1	0.727739	0.452903	0.340135	0.821456	0.384179
64.5	0.737107	0.467048	0.351295	0.82551	0.380837
59.2	0.725348	0.451599	0.335893	0.825932	0.408248
62.8	0.720396	0.453211	0.340763	0.812131	0.36737
61	0.706286	0.428935	0.32324	0.801461	0.374729
57.5	0.707279	0.424762	0.316487	0.81211	0.389318
63.4	0.70254	0.413372	0.308511	0.805368	0.381649
57.3	0.696759	0.419936	0.313792	0.793084	0.372913
61.4	0.681205	0.404546	0.303572	0.783587	0.376076
65.2	0.683927	0.417657	0.315226	0.778304	0.37616
62.5	0.69165	0.404806	0.303564	0.790737	0.383969
60	0.659053	0.377662	0.28861	0.760699	0.376557
60	0.669464	0.387866	0.292892	0.768103	0.375657
58.9	0.703791	0.418163	0.311079	0.803274	0.381155
59.8	0.658136	0.392796	0.296678	0.747427	0.390768
61	0.679632	0.397885	0.298729	0.786032	0.386311
59.1	0.68525	0.407316	0.306316	0.790689	0.378966
59.7	0.654157	0.382318	0.291677	0.757408	0.373892
62.4	0.653854	0.377813	0.288838	0.750022	0.355744
60.5	0.692666	0.407838	0.30433	0.796787	0.380028
58.5	0.694149	0.410637	0.307921	0.793797	0.373859
57.2	0.696466	0.40709	0.304785	0.802136	0.377781
62.2	0.726072	0.437059	0.321148	0.827531	0.399529
59.5	0.669282	0.384781	0.290655	0.78187	0.377526
58.6	0.675071	0.390731	0.295287	0.786454	0.373829
62.2	0.679796	0.400484	0.300722	0.783713	0.374558
59	0.695015	0.41218	0.306317	0.799694	0.389645
57.2	0.676271	0.394163	0.297247	0.776092	0.372516
57.9	0.687626	0.395315	0.293735	0.793477	0.382048
58.4	0.652985	0.375428	0.285435	0.762838	0.396951
54	0.668224	0.3835	0.28792	0.773434	0.418861
63.9	0.681107	0.419614	0.318368	0.771252	0.383926
63.3	0.67883	0.415989	0.316803	0.762587	0.382418
61.3	0.656066	0.398429	0.303091	0.742013	0.376824
54.5	0.684571	0.417584	0.315539	0.777042	0.388768
59.7	0.675345	0.408788	0.312253	0.762778	0.370367
60.5	0.694277	0.418907	0.317165	0.774412	0.378373
54.4	0.68163	0.409603	0.307194	0.772543	0.3855
62.1	0.697286	0.421271	0.314433	0.790344	0.393535
62.8	0.676784	0.410723	0.311336	0.763048	0.382771
61.3	0.672927	0.40405	0.302191	0.763165	0.393115
60.6	0.677589	0.417106	0.318371	0.75165	0.367701
59.2	0.703269	0.428517	0.321345	0.796445	0.396655
63.7	0.674875	0.410588	0.308436	0.768434	0.378692
60.7	0.680309	0.410038	0.305766	0.775885	0.388484
69.3	0.664306	0.412069	0.313542	0.748405	0.374566
60.6	0.693021	0.425171	0.320526	0.778068	0.389903
56.4	0.715163	0.434983	0.324013	0.809196	0.402189
61.1	0.733142	0.456549	0.342816	0.816578	0.386712
64.5	0.739421	0.468288	0.351379	0.823056	0.389375
67.2	0.738191	0.470918	0.354923	0.821867	0.380282
64.1	0.72829	0.45476	0.340374	0.815539	0.402838
63.5	0.735545	0.467533	0.35168	0.814967	0.397539
60.6	0.728759	0.45623	0.342506	0.818313	0.395971
58.6	0.730592	0.45225	0.338033	0.820709	0.398723
61.3	0.717588	0.438258	0.327521	0.806534	0.387368
61.2	0.724553	0.44651	0.334759	0.812756	0.38495
65.3	0.732055	0.460103	0.346786	0.818204	0.396386
62.5	0.735979	0.465653	0.347741	0.8284	0.397439
62.5	0.735194	0.451741	0.335392	0.834269	0.398697
57.5	0.729191	0.447827	0.332359	0.825348	0.406634
53.9	0.700393	0.426854	0.32086	0.787147	0.382341
66	0.72538	0.454283	0.341034	0.806094	0.396517
60.6	0.724343	0.451204	0.33864	0.816737	0.39475
64.2	0.717371	0.460507	0.352369	0.802844	0.383865
57.8	0.702852	0.42803	0.322209	0.798819	0.389327
59.8	0.714995	0.433328	0.323094	0.808388	0.387496
61.3	0.728643	0.455167	0.341704	0.813001	0.380944
61	0.711408	0.438158	0.330111	0.792759	0.384137
60.2	0.710181	0.433639	0.325686	0.797846	0.376651
63.5	0.742484	0.466278	0.348631	0.824712	0.391803
62	0.681659	0.418045	0.320292	0.762319	0.36717
62.5	0.698727	0.424803	0.319701	0.788529	0.390418
59.1	0.716888	0.441073	0.329	0.808644	0.395067
61.6	0.700758	0.430621	0.323537	0.78919	0.383935
64.1	0.705342	0.432533	0.324991	0.79075	0.386164
60.7	0.697791	0.432954	0.328191	0.777105	0.375818
62.2	0.719244	0.453661	0.344614	0.797235	0.37871
63.6	0.724362	0.460409	0.349594	0.80076	0.398792
59.1	0.736836	0.470341	0.355475	0.820924	0.392452
58.4	0.726217	0.455623	0.340723	0.818742	0.405707
63.4	0.74065	0.472446	0.355567	0.824854	0.398914
63.5	0.728714	0.458265	0.341767	0.824185	0.414987
64.1	0.714967	0.449022	0.338532	0.80065	0.379993
59.6	0.706817	0.435602	0.327517	0.797778	0.391388
59	0.706116	0.430521	0.32145	0.804403	0.40059
60.6	0.69521	0.413949	0.3095	0.793277	0.390279
57.9	0.685139	0.415276	0.31084	0.777193	0.386195
59.3	0.670833	0.395252	0.295766	0.767778	0.387994
59.1	0.668176	0.403095	0.305462	0.752931	0.384857
63.6	0.676005	0.394993	0.296998	0.766591	0.390779
62.5	0.648839	0.373814	0.285515	0.741852	0.372786
58.6	0.659606	0.385276	0.291511	0.751747	0.373496
59.9	0.698985	0.414927	0.3078	0.794202	0.388815
56.1	0.651346	0.386444	0.293461	0.739582	0.380702
56.3	0.663007	0.388144	0.290878	0.765296	0.383342
56.6	0.667301	0.393909	0.296107	0.769337	0.381859
58.1	0.639514	0.370811	0.282951	0.737974	0.374582
60.3	0.641506	0.367228	0.280659	0.731806	0.36594
61.2	0.694201	0.41265	0.306433	0.791797	0.394722
57.7	0.692699	0.415301	0.311157	0.78768	0.38672
57.8	0.685835	0.40517	0.30214	0.786288	0.391875
62.2	0.719163	0.430471	0.316321	0.818228	0.410374
56.7	0.644786	0.367291	0.27864	0.751845	0.374722
57.7	0.648528	0.365451	0.27662	0.759836	0.381086
58.3	0.670072	0.392279	0.292835	0.770809	0.388696
60.7	0.697124	0.417365	0.310508	0.796784	0.401627
56.7	0.664741	0.388402	0.293673	0.760693	0.376245
58.6	0.677816	0.392439	0.290744	0.779857	0.386261
54.9	0.636	0.36411	0.276407	0.743473	0.381603
58.8	0.654448	0.377928	0.28353	0.760607	0.396056
59.4	0.650569	0.39533	0.301635	0.743214	0.375022
52.1	0.653497	0.392343	0.302801	0.745181	0.36985
57.2	0.619063	0.365384	0.284513	0.714807	0.361795
49	0.648202	0.384134	0.293591	0.755549	0.373199
56.3	0.651911	0.385329	0.296186	0.746311	0.360853
64.2	0.663469	0.394736	0.30209	0.75144	0.362213
52.2	0.647371	0.382931	0.293059	0.743016	0.366892
47.4	0.65699	0.388369	0.295132	0.754914	0.374673
50.7	0.637143	0.375255	0.28776	0.728211	0.363255
50.4	0.646461	0.378926	0.285755	0.744114	0.375011
52.2	0.641955	0.382045	0.294398	0.726261	0.350672
50.8	0.658325	0.381947	0.28784	0.764753	0.374268
44.1	0.631564	0.363716	0.277914	0.738031	0.359554
45.3	0.627122	0.353598	0.270366	0.733693	0.366
43.8	0.637008	0.374605	0.287469	0.733942	0.362163
55.1	0.673767	0.405598	0.307807	0.770051	0.370436
46.7	0.685554	0.405175	0.304849	0.788178	0.38975
48.1	0.696761	0.425927	0.32388	0.785767	0.376513
63.2	0.711095	0.432491	0.323694	0.803924	0.380837
55	0.708851	0.432199	0.322947	0.800208	0.368182
57.6	0.696644	0.416265	0.312949	0.789004	0.387944
48.5	0.697192	0.427856	0.324251	0.78338	0.38123
56.8	0.680652	0.398586	0.300576	0.777733	0.372328
47.7	0.689408	0.40202	0.30206	0.78597	0.378469
47.8	0.661408	0.379935	0.290345	0.749618	0.363823
56.1	0.669735	0.384916	0.290748	0.760499	0.360791
52.8	0.691193	0.410577	0.31124	0.778555	0.373667
54.1	0.688368	0.412712	0.308576	0.790455	0.377584
46.1	0.694271	0.405769	0.304031	0.804048	0.378792
51.9	0.704263	0.41668	0.310289	0.810531	0.393312
49.2	0.661909	0.387366	0.294349	0.760417	0.364819
53.5	0.686775	0.403476	0.30446	0.775682	0.375339
53	0.69613	0.419396	0.316436	0.793669	0.378067
58.1	0.686034	0.424179	0.325717	0.777813	0.370025
52.2	0.667737	0.387395	0.294778	0.772362	0.376848
51.9	0.682985	0.396071	0.299285	0.780948	0.373677
53.2	0.700417	0.422132	0.315896	0.793388	0.368823
53.8	0.688942	0.415601	0.314163	0.77744	0.370659
43.1	0.685712	0.40653	0.305193	0.785607	0.362149
51.4	0.706737	0.43149	0.32423	0.79675	0.375774
48.8	0.638723	0.373982	0.29322	0.729214	0.356804
51.4	0.660851	0.378832	0.290522	0.758711	0.375835
50.2	0.663475	0.383954	0.29201	0.761434	0.372804
49.4	0.652346	0.377997	0.286945	0.746315	0.363083
58.2	0.679772	0.407224	0.306184	0.772924	0.370336
55.4	0.671085	0.402196	0.307701	0.756609	0.363684
52.4	0.686669	0.416517	0.317346	0.770591	0.367824
57.5	0.703759	0.43256	0.327184	0.785144	0.385061
48.2	0.68629	0.415055	0.315398	0.773264	0.372101
50.5	0.687263	0.414006	0.314216	0.786657	0.389922
47	0.692593	0.415215	0.314378	0.783631	0.38204
53	0.699273	0.424648	0.318415	0.793783	0.392993
48.5	0.664146	0.393775	0.299326	0.750679	0.355609
45	0.657358	0.379075	0.288608	0.757646	0.371372
46	0.634636	0.354537	0.269933	0.734505	0.364001
37.3	0.574586	0.307697	0.261131	0.658056	0.335151
39.5	0.57689	0.307545	0.255496	0.657399	0.335259
32.7	0.554868	0.28776	0.248666	0.630379	0.324565
30.6	0.50562	0.280243	0.250738	0.537889	0.299892
38.4	0.534988	0.28173	0.252114	0.589741	0.316203
42.8	0.525154	0.281077	0.249383	0.58814	0.31301
36.7	0.553567	0.296611	0.253395	0.626605	0.327496
38.1	0.580682	0.30417	0.252345	0.669162	0.342622
36.6	0.552048	0.299002	0.254892	0.622974	0.329608
28.9	0.489928	0.277716	0.254546	0.521552	0.288146
40.7	0.509189	0.281796	0.259385	0.553041	0.298984
42.9	0.530966	0.285647	0.25752	0.605458	0.324886
48.1	0.557072	0.30307	0.253345	0.642024	0.332309
44.1	0.603033	0.317997	0.255248	0.706015	0.357753
34	0.612249	0.33183	0.260529	0.710195	0.351801
42	0.573412	0.299742	0.253437	0.663695	0.33848
43.7	0.58987	0.302839	0.25033	0.676976	0.346953
34.1	0.465953	0.283759	0.259278	0.494318	0.283692
34.3	0.458091	0.276262	0.253613	0.47967	0.273957
43.3	0.533934	0.288262	0.256913	0.611957	0.321972
36.7	0.622541	0.342484	0.262438	0.7203	0.364091
42.6	0.542271	0.288439	0.249565	0.616817	0.317301
38.1	0.560782	0.296023	0.253117	0.644302	0.333236
38.4	0.518928	0.280791	0.264509	0.586779	0.320363
40.1	0.540258	0.290055	0.259052	0.620512	0.331645
53.6	0.60246	0.386322	0.307147	0.702679	0.358032
49.3	0.621882	0.394483	0.310607	0.726797	0.358166
41.9	0.572217	0.35806	0.294177	0.679158	0.340846
38.5	0.5977	0.380546	0.304379	0.714145	0.346975
45.4	0.611568	0.383201	0.305459	0.702474	0.335286
44.3	0.633576	0.402329	0.317479	0.731018	0.349965
48.8	0.619035	0.390848	0.307826	0.729174	0.354753
37.5	0.612379	0.372254	0.292871	0.718822	0.355333
45.7	0.586405	0.360072	0.290903	0.6812	0.34609
49.1	0.610248	0.378639	0.295749	0.72275	0.371949
43.1	0.596152	0.370093	0.297264	0.68309	0.344478
45.8	0.60126	0.368354	0.294811	0.715428	0.369207
40.4	0.569743	0.348693	0.281864	0.681824	0.347104
41.5	0.552558	0.336987	0.286227	0.650942	0.342535
39.5	0.584625	0.361444	0.290586	0.688038	0.34794
51.9	0.643884	0.408332	0.318978	0.755569	0.373212
46.9	0.644616	0.399879	0.312721	0.76086	0.377533
49.2	0.674161	0.430391	0.335075	0.775744	0.36747
50.2	0.67209	0.429647	0.332927	0.771346	0.369628
48.5	0.668948	0.428287	0.332108	0.77164	0.358113
49	0.625861	0.389366	0.308825	0.727298	0.353335
50.5	0.641947	0.409167	0.32237	0.734845	0.357753
40.3	0.603112	0.371799	0.302095	0.689492	0.341597
35.2	0.611799	0.36825	0.298015	0.696899	0.345302
40.8	0.587042	0.354813	0.295483	0.660776	0.339246
36.1	0.606436	0.362314	0.294912	0.690003	0.34191
42.9	0.650704	0.40181	0.313931	0.751356	0.372225
43.9	0.63531	0.392605	0.308368	0.751907	0.378282
45.2	0.63324	0.390936	0.310371	0.759381	0.37179
43	0.661267	0.409859	0.31778	0.791331	0.389879
37.5	0.608693	0.376922	0.300943	0.719424	0.357432
44.7	0.622234	0.373424	0.29596	0.717395	0.363664
47.6	0.647339	0.405375	0.319867	0.757192	0.366244
42.2	0.622328	0.392208	0.31549	0.716081	0.344772
42.2	0.603161	0.368044	0.295769	0.719293	0.352565
45.4	0.637743	0.392139	0.309937	0.753375	0.360419
51.4	0.655038	0.410583	0.318047	0.758479	0.351094
45.7	0.593088	0.37064	0.297044	0.680916	0.338266
39.2	0.612356	0.378679	0.298006	0.727658	0.346397
45.9	0.654652	0.410966	0.319007	0.758192	0.359964
44.6	0.528835	0.336713	0.28893	0.604541	0.322406
41.3	0.606919	0.365601	0.293578	0.714561	0.363885
40.6	0.588722	0.355581	0.291958	0.679639	0.357993
43.8	0.570564	0.344957	0.285796	0.653533	0.34848
49.7	0.626108	0.388157	0.304097	0.735344	0.370446
47.3	0.607978	0.380933	0.306542	0.702489	0.352374
43.7	0.629095	0.402208	0.323347	0.724612	0.358889
47.6	0.663359	0.423371	0.328971	0.76257	0.383188
37.7	0.608109	0.373088	0.303252	0.679055	0.335762
47.5	0.643919	0.40422	0.318171	0.75659	0.376288
41.5	0.62152	0.378813	0.302544	0.711363	0.348444
47.9	0.666466	0.420727	0.326867	0.775532	0.381629
42.8	0.591412	0.361607	0.29573	0.660376	0.323158
39.4	0.583967	0.341565	0.284315	0.678405	0.362263
35	0.55116	0.323705	0.280709	0.620322	0.342705
18.3	0.481247	0.308893	0.283184	0.514184	0.29119
31.5	0.470223	0.307214	0.28634	0.506116	0.285739
25.9	0.456954	0.299202	0.280806	0.48741	0.279329
19.6	0.41443	0.296108	0.278137	0.412343	0.258103
25	0.437104	0.304331	0.28754	0.446469	0.273535
28.7	0.437859	0.301099	0.281925	0.456913	0.27356
31.6	0.460726	0.302024	0.283622	0.490232	0.283161
29.5	0.480368	0.300688	0.282837	0.52473	0.30033
27	0.465498	0.293403	0.268943	0.513937	0.297588
22.6	0.407045	0.290605	0.26958	0.394812	0.245222
27.3	0.415055	0.293656	0.274955	0.397204	0.248905
28.8	0.447806	0.294628	0.271506	0.461394	0.263607
37.3	0.472537	0.301095	0.270271	0.529138	0.288237
25.3	0.505158	0.2977	0.268911	0.564072	0.296292
24.7	0.509503	0.300984	0.272377	0.566997	0.313644
23.8	0.476204	0.301525	0.283178	0.512106	0.294609
26.4	0.473378	0.291588	0.274282	0.504113	0.291452
18.9	0.371727	0.288045	0.269706	0.363575	0.241478
21.5	0.384198	0.288739	0.270913	0.376691	0.243979
31.7	0.452328	0.311467	0.292142	0.475592	0.27655
32.1	0.53362	0.312081	0.283148	0.60531	0.330545
24.5	0.464796	0.305415	0.282679	0.49906	0.281205
35.1	0.470008	0.299488	0.282358	0.515273	0.292358
25.6	0.436814	0.31041	0.29189	0.445374	0.268955
26.7	0.45765	0.298707	0.27847	0.47013	0.278392
30	0.547092	0.336374	0.27812	0.653011	0.296788
43.4	0.566788	0.345305	0.282668	0.676466	0.304307
39.6	0.51169	0.331446	0.284528	0.600008	0.290294
30.3	0.520388	0.312117	0.26289	0.630177	0.28218
33.9	0.522807	0.341706	0.289056	0.588032	0.279644
46.2	0.57588	0.353991	0.289289	0.682561	0.300791
40.2	0.55647	0.341567	0.28179	0.66704	0.303259
31.4	0.504865	0.32686	0.284965	0.575036	0.273737
36.3	0.462538	0.291485	0.259835	0.518187	0.251474
33.5	0.526238	0.335927	0.284677	0.617975	0.294538
36.5	0.453171	0.289967	0.260699	0.496284	0.245128
31.4	0.499835	0.322517	0.282204	0.575759	0.276714
36	0.474888	0.302219	0.267071	0.541076	0.261127
28.7	0.441602	0.292613	0.267028	0.474032	0.248521
27.4	0.517764	0.326835	0.278937	0.582045	0.273572
37.8	0.566675	0.338665	0.277641	0.659083	0.277911
47.7	0.583196	0.356792	0.291332	0.710969	0.317435
46.3	0.605573	0.366142	0.291842	0.717397	0.313985
47.8	0.576968	0.363465	0.299747	0.662271	0.30052
32.8	0.575591	0.33953	0.276361	0.668409	0.285529
38.5	0.51442	0.329811	0.283027	0.584562	0.283979
40.5	0.55138	0.343921	0.287968	0.632821	0.289943
30.5	0.478903	0.298873	0.265786	0.518187	0.252153
32.3	0.483037	0.318815	0.281948	0.51125	0.260592
29.8	0.422529	0.280841	0.258261	0.442731	0.234631
29.8	0.470877	0.313733	0.281251	0.503384	0.2552
31.6	0.543377	0.321083	0.27467	0.618235	0.275385
31.1	0.544148	0.333597	0.279509	0.623285	0.289479
26.6	0.535604	0.33401	0.284666	0.599151	0.280919
39.6	0.587013	0.345618	0.277795	0.717614	0.323465
25.8	0.52799	0.334573	0.284268	0.598606	0.286438
28.6	0.507751	0.300295	0.264139	0.559236	0.261584
45.1	0.577334	0.353519	0.289986	0.693776	0.308251
34.5	0.520398	0.317249	0.272919	0.57338	0.263763
42	0.523249	0.337048	0.287506	0.60483	0.294401
32.3	0.541793	0.31554	0.265156	0.651112	0.294183
44.6	0.559717	0.348947	0.286046	0.639942	0.295865
36.2	0.504267	0.320972	0.278579	0.545247	0.26581
32.4	0.525166	0.311185	0.265262	0.612375	0.278109
39.8	0.545597	0.349949	0.291869	0.614303	0.291405
32.8	0.430739	0.280903	0.256781	0.466592	0.239701
33.5	0.497199	0.31997	0.278453	0.570207	0.284228
37.3	0.467666	0.301545	0.269528	0.502512	0.255956
24.3	0.444323	0.296832	0.269988	0.46522	0.247283
36.5	0.543495	0.341167	0.288221	0.622682	0.294983
37.6	0.494034	0.301451	0.262326	0.545678	0.260528
36	0.530247	0.339643	0.29018	0.583831	0.280204
43.1	0.564993	0.34254	0.284343	0.654078	0.29332
20.9	0.476017	0.315529	0.282842	0.494311	0.258337
40.8	0.582125	0.350966	0.28529	0.708287	0.315734
28.9	0.536469	0.340533	0.291216	0.590326	0.284994
34.6	0.583075	0.350196	0.28507	0.692628	0.324597
28.1	0.447536	0.305926	0.278594	0.455887	0.252079
32.6	0.464713	0.305721	0.278987	0.506035	0.267031
22.4	0.386243	0.278518	0.258862	0.385982	0.232039
25.7	0.392278	0.292598	0.271113	0.390573	0.235911
24.6	0.355386	0.267107	0.254408	0.344983	0.224818
17.6	0.380366	0.28618	0.266315	0.380661	0.234805
19.9	0.363564	0.279172	0.263857	0.364778	0.225715
23.3	0.353276	0.267859	0.25345	0.350776	0.2276
22.1	0.372593	0.283434	0.263501	0.386037	0.231604
23.4	0.357475	0.25981	0.246452	0.355973	0.22939
24	0.394878	0.294642	0.274249	0.384676	0.236584
21.2	0.373169	0.283633	0.270304	0.38191	0.237079
18.9	0.369533	0.282664	0.264668	0.38534	0.228393
23.6	0.346779	0.264768	0.252737	0.337151	0.232976
23.8	0.384237	0.287573	0.2701	0.392618	0.230941
24.3	0.383688	0.267515	0.251727	0.406991	0.236362
23.5	0.399784	0.283856	0.266086	0.40334	0.237988
24.5	0.390989	0.283836	0.267922	0.396817	0.241063
22.1	0.371279	0.271294	0.256521	0.352814	0.226179
24.6	0.384886	0.289754	0.272006	0.366541	0.230341
22.1	0.32554	0.258383	0.246915	0.332176	0.219705
21.7	0.365239	0.28084	0.263013	0.380322	0.230756
22.9	0.370271	0.280982	0.264735	0.370499	0.22573
23.9	0.384763	0.279141	0.261773	0.380847	0.233474
19.3	0.390875	0.281999	0.25974	0.409945	0.232601
21.9	0.362117	0.26447	0.25208	0.364154	0.225462
22.7	0.36866	0.288364	0.269623	0.370338	0.230097
20.7	0.374312	0.286263	0.268602	0.371111	0.229012
31.2	0.455873	0.29395	0.270825	0.524085	0.266775
29.6	0.470579	0.273403	0.244266	0.558794	0.253435
24.8	0.405453	0.28715	0.268826	0.445417	0.242995
26.7	0.423198	0.282821	0.263633	0.464323	0.24878
29.8	0.396044	0.274025	0.258359	0.42658	0.240042
32.4	0.46001	0.296755	0.273015	0.526862	0.261137
27.3	0.442456	0.264986	0.247087	0.519442	0.250616
19.8	0.383006	0.273539	0.257334	0.411679	0.235306
23.5	0.364042	0.258684	0.246609	0.386876	0.230071
23.8	0.404339	0.277261	0.263359	0.452697	0.254402
19.9	0.375357	0.270518	0.258668	0.409968	0.237064
25.6	0.381966	0.259854	0.246051	0.402269	0.230384
25.5	0.38964	0.273899	0.259012	0.416949	0.236732
18.1	0.35019	0.249313	0.238662	0.35919	0.224672
23.8	0.422473	0.281045	0.265466	0.458153	0.243994
32.4	0.448071	0.283098	0.265189	0.490639	0.251277
40.2	0.491798	0.307165	0.272562	0.578629	0.289558
32.4	0.494139	0.286076	0.251887	0.571655	0.260307
27.7	0.439422	0.290114	0.267938	0.472979	0.246631
34.3	0.441945	0.282826	0.263358	0.483778	0.244894
23.3	0.383305	0.273688	0.260502	0.384338	0.232559
26.4	0.418778	0.293059	0.278151	0.440088	0.246677
18.4	0.370852	0.266931	0.255818	0.369146	0.229927
24.5	0.374784	0.278524	0.260674	0.371847	0.230517
16	0.356439	0.2643	0.248271	0.366087	0.226171
15.8	0.357526	0.273844	0.261226	0.368923	0.241071
26.9	0.404153	0.294341	0.277776	0.403975	0.241441
31.2	0.412769	0.26245	0.248113	0.43857	0.242763
18	0.405611	0.28792	0.267465	0.404072	0.247151
31.1	0.486244	0.29151	0.260346	0.553396	0.275517
26.2	0.411173	0.275939	0.259499	0.433455	0.237546
29.3	0.397343	0.278013	0.264477	0.402173	0.236182
34.8	0.474231	0.303319	0.278632	0.541188	0.274332
27.7	0.403647	0.267453	0.253067	0.398507	0.234684
25.1	0.40728	0.288411	0.269041	0.431617	0.246687
26.6	0.4222	0.283729	0.266679	0.452314	0.248436
31.2	0.425627	0.274844	0.259189	0.456684	0.240811
19.5	0.380205	0.286047	0.269445	0.369327	0.232186
28.5	0.40097	0.265443	0.253595	0.418555	0.234151
28.7	0.403165	0.287625	0.270843	0.421586	0.242945
16.8	0.341259	0.272726	0.256901	0.345338	0.233521
22.5	0.36415	0.270675	0.257374	0.379485	0.234241
19.1	0.362304	0.282062	0.267453	0.367724	0.238821
13.8	0.353324	0.265455	0.256681	0.351711	0.238215
31.2	0.422405	0.289685	0.268986	0.451267	0.251551
25	0.375621	0.275923	0.259587	0.376632	0.235975
27.6	0.396607	0.270067	0.254779	0.403508	0.23752
28.9	0.434827	0.290826	0.274441	0.471272	0.257658
13.7	0.405282	0.295965	0.272165	0.415569	0.270536
37.7	0.488093	0.289862	0.254086	0.590769	0.268976
