# Supplementary material for: Estimation of maize LCC and FVC for full growth periods based on UAV remote sensing and ensemble learning
Source: PeerJ journal article supplement (doi:10.7717/peerj-cs.3356), 2025-11-04
Supplement: LCCVI_TF.xlsx [file LCCVI_TF.xlsx]

## Sheet: Sheet1
48.8	0.416984	0.262181	0.244911	0.498883	0.318947	35.8413	6.8325	0.434336	12.0528	2.43371	1.88936	0.295216	0.628818
56.3	0.434489	0.263258	0.24074	0.51129	0.324993	36.5246	6.26022	0.440693	11.3148	2.35461	1.8788	0.299133	0.623583
69.1	0.415527	0.255274	0.235458	0.485897	0.303618	35.3824	4.88426	0.448089	8.8246	2.11512	1.8634	0.286834	0.625569
53.4	0.422933	0.258056	0.237882	0.506762	0.320041	36.2409	4.72298	0.46205	8.4609	2.0541	1.83455	0.302113	0.631246
50	0.406248	0.253802	0.239888	0.48783	0.308737	35.5696	4.54733	0.465963	8.1409	2.00017	1.83151	0.300183	0.626651
46.4	0.404068	0.253745	0.242373	0.477615	0.303918	35.2192	4.62869	0.458476	8.28098	2.03594	1.84479	0.295432	0.625076
48.7	0.38103	0.245579	0.230865	0.439915	0.29411	33.7033	4.52691	0.458866	8.20909	2.02629	1.83842	0.295871	0.624063
56.6	0.387957	0.247969	0.234643	0.460561	0.301691	35.0325	4.96593	0.445048	9.10061	2.15158	1.86638	0.285826	0.625397
48.8	0.384434	0.248077	0.235788	0.452839	0.29629	34.0621	4.69959	0.459611	8.33939	2.03543	1.84142	0.294905	0.627284
46.7	0.383517	0.252616	0.23945	0.437804	0.29172	33.6273	4.66246	0.454431	8.31722	2.04402	1.85206	0.287393	0.621933
51.3	0.34545	0.250139	0.241206	0.3896	0.272	31.517	4.04993	0.476748	7.36937	1.89946	1.80367	0.305249	0.616173
42.5	0.375362	0.254109	0.246376	0.442186	0.298405	33.1461	4.71587	0.461739	8.4167	2.03777	1.83592	0.296597	0.620415
51.2	0.375252	0.243891	0.232061	0.43945	0.289821	33.4268	4.64556	0.457905	8.37658	2.04212	1.84135	0.291317	0.624891
48.1	0.364609	0.241928	0.232019	0.420077	0.283338	32.6134	4.59377	0.459805	8.42696	2.04918	1.84223	0.297752	0.619313
50.3	0.40649	0.247323	0.233476	0.483745	0.308935	35.753	5.17827	0.450643	9.40518	2.16185	1.85697	0.293758	0.628339
48.9	0.401422	0.258446	0.241293	0.470015	0.303017	33.9759	6.15092	0.437803	10.8119	2.31707	1.8846	0.287316	0.6175
48	0.397994	0.257771	0.246483	0.470839	0.310181	34.174	6.54423	0.43861	11.2888	2.35884	1.88707	0.291063	0.622667
52.6	0.421775	0.264654	0.244574	0.490972	0.316135	35.2971	6.04009	0.439432	10.8227	2.31061	1.88	0.290944	0.621278
53.3	0.455837	0.265583	0.238373	0.536273	0.320244	37.52	4.58277	0.462363	8.43865	2.04195	1.83248	0.301891	0.627215
51.4	0.460776	0.263826	0.240114	0.546685	0.326455	38.5522	4.83383	0.458601	8.8401	2.09578	1.83685	0.301921	0.629907
53.9	0.454748	0.263722	0.240679	0.539089	0.330936	38.0366	4.49728	0.477654	7.98224	1.95286	1.80555	0.311341	0.628416
54	0.431283	0.262674	0.240259	0.504547	0.315304	36.7149	4.79302	0.464299	8.49881	2.04818	1.82781	0.306658	0.633262
53.4	0.44552	0.259129	0.232921	0.527994	0.323523	38.1417	4.73342	0.461718	8.48888	2.04545	1.8323	0.305328	0.631645
47	0.410928	0.247975	0.230817	0.49921	0.326384	35.7569	4.27958	0.490034	7.40023	1.87278	1.78195	0.317671	0.624724
50.5	0.427067	0.253187	0.233667	0.506404	0.320214	36.7876	4.45708	0.467009	8.002	1.98686	1.82575	0.302093	0.630804
51.6	0.437613	0.260156	0.240393	0.517077	0.316248	37.3954	4.62855	0.458194	8.31239	2.03582	1.84458	0.294916	0.63008
53	0.422313	0.259844	0.243357	0.497948	0.309772	36.333	4.76984	0.455134	8.60408	2.07001	1.84837	0.292174	0.628469
52.3	0.412817	0.254743	0.237557	0.479181	0.306682	35.1866	4.95313	0.454329	8.74802	2.09179	1.85516	0.29402	0.628917
57.6	0.42771	0.256173	0.236397	0.502942	0.318616	36.209	4.84595	0.459421	8.5393	2.05638	1.84326	0.298112	0.632165
54.1	0.417634	0.253002	0.2338	0.493197	0.31133	36.8522	4.67402	0.456764	8.26717	2.04216	1.84604	0.294474	0.630929
50.7	0.427657	0.255115	0.236033	0.510569	0.323217	37.3603	4.56608	0.463856	8.27089	2.02452	1.83244	0.299151	0.629672
48.7	0.429835	0.261315	0.239375	0.50247	0.311224	35.9742	6.26247	0.429078	10.9609	2.35064	1.89612	0.284869	0.624065
47.4	0.43297	0.265949	0.247869	0.51599	0.319802	37.6718	6.70712	0.417346	12.0819	2.48709	1.91971	0.276589	0.623164
51.7	0.428138	0.262064	0.240623	0.496413	0.316745	35.6379	5.8416	0.442047	10.2384	2.24059	1.8802	0.290379	0.620704
50.5	0.440273	0.262112	0.237808	0.526417	0.322612	37.5566	4.43847	0.465718	8.23487	2.00702	1.82202	0.299714	0.629927
46.4	0.436314	0.265434	0.243905	0.517506	0.318154	37.7991	4.91563	0.452375	8.85351	2.11127	1.84951	0.295157	0.629927
47.8	0.437742	0.259829	0.238141	0.520887	0.324325	36.8929	4.42068	0.478384	7.75903	1.93069	1.80586	0.312371	0.633778
40.4	0.362024	0.253844	0.243269	0.420172	0.288488	31.4497	3.68231	0.5156	6.47011	1.71652	1.73707	0.323808	0.612998
43.2	0.398119	0.247789	0.233062	0.474735	0.303035	35.9548	4.7627	0.450555	8.72106	2.09699	1.85656	0.290342	0.629967
44	0.388784	0.246184	0.230894	0.457335	0.296933	34.7423	4.73127	0.449267	8.48993	2.07868	1.85605	0.286906	0.625303
42.8	0.388956	0.24753	0.234745	0.459244	0.299424	34.9646	4.59252	0.456283	8.33717	2.04239	1.84405	0.291487	0.627249
50.5	0.441604	0.260919	0.24011	0.525512	0.313551	38.2201	4.71776	0.451143	8.48039	2.07477	1.85941	0.286763	0.630989
44	0.384069	0.252777	0.239761	0.448078	0.290764	33.7995	4.48495	0.468458	8.0969	1.99237	1.82278	0.300577	0.62414
44.6	0.420493	0.255531	0.241703	0.505057	0.319063	37.2311	4.71554	0.455445	8.51951	2.0709	1.84401	0.294923	0.630587
54.9	0.420269	0.251023	0.236258	0.50211	0.317401	36.5768	4.86469	0.462199	8.33038	2.02664	1.84104	0.298581	0.633015
51.5	0.417095	0.250773	0.233861	0.492124	0.312852	36.4283	4.6549	0.459787	8.38349	2.04591	1.84361	0.29428	0.631002
49.8	0.432609	0.258131	0.239558	0.513993	0.322634	37.2181	4.63145	0.459933	8.42988	2.05	1.84377	0.296165	0.629436
44.5	0.402366	0.250442	0.233052	0.469667	0.302922	34.8455	6.014	0.430763	10.9549	2.34809	1.89361	0.286879	0.618126
45.8	0.423785	0.259758	0.242358	0.513742	0.332409	37.0052	6.28639	0.446615	10.8583	2.29799	1.87363	0.294788	0.623984
48	0.420533	0.262898	0.242719	0.506871	0.321326	36.5517	5.71784	0.453487	10.038	2.20962	1.8592	0.313409	0.625457
54.1	0.534864	0.292509	0.247074	0.65175	0.351012	42.3393	4.32821	0.525128	7.78644	1.74734	1.71756	0.335924	0.610144
47.5	0.569322	0.313419	0.251511	0.685203	0.355714	42.6729	3.52998	0.553202	5.94095	1.56405	1.67624	0.366248	0.617037
51.2	0.55353	0.311436	0.252769	0.669392	0.348411	41.9125	4.57009	0.531799	8.253	1.78488	1.7036	0.363293	0.618736
47	0.536182	0.292332	0.247822	0.66149	0.352531	42.071	4.11288	0.534119	6.72848	1.68331	1.71264	0.363408	0.625738
49.7	0.501221	0.283933	0.248798	0.612705	0.338917	40.1306	4.38876	0.527169	7.67137	1.75508	1.72556	0.355062	0.622011
47.8	0.532799	0.296515	0.252862	0.653662	0.348796	41.89	3.96773	0.523231	6.78905	1.71608	1.72646	0.343522	0.620344
46.2	0.508031	0.28931	0.246862	0.623603	0.343278	40.6458	4.38322	0.534018	7.80233	1.73128	1.70345	0.355896	0.61314
44.1	0.520147	0.290463	0.250354	0.64716	0.350673	42.1357	3.50515	0.536631	6.08942	1.63003	1.69681	0.350075	0.617596
46.4	0.518638	0.282938	0.244602	0.641434	0.355123	42.0652	3.75465	0.545525	6.47661	1.61164	1.68614	0.354606	0.616418
45.7	0.49178	0.276982	0.247532	0.609428	0.332303	40.3828	3.66072	0.52733	6.36057	1.65701	1.71912	0.339751	0.61593
50	0.534208	0.297941	0.248455	0.652154	0.333867	41.3841	4.41827	0.516095	8.08533	1.81648	1.73348	0.336547	0.611681
49	0.552693	0.301496	0.252734	0.68169	0.353107	43.1425	3.71898	0.529152	6.42262	1.68642	1.71315	0.34823	0.619245
45.1	0.507341	0.286075	0.248677	0.633407	0.344617	41.2618	4.14152	0.521657	7.44324	1.75538	1.72427	0.342123	0.610656
49.1	0.517894	0.292238	0.251163	0.63416	0.345208	41.011	3.87597	0.524131	6.52579	1.6885	1.73113	0.339602	0.617411
45.8	0.516481	0.294688	0.246621	0.632034	0.343507	40.6007	4.53467	0.523211	7.95031	1.79085	1.72325	0.348847	0.615496
50.3	0.506566	0.293279	0.251886	0.620244	0.344207	41.101	4.553	0.510439	8.05637	1.84686	1.74657	0.334761	0.61206
51.7	0.592153	0.316379	0.257091	0.720622	0.36336	45.0164	4.33015	0.532264	7.25022	1.71416	1.7066	0.346433	0.623417
46.4	0.587341	0.316825	0.255452	0.705753	0.359801	43.8887	4.22547	0.525791	7.19793	1.7348	1.71348	0.344026	0.616628
50.7	0.564718	0.315639	0.253869	0.681507	0.349297	43.0264	4.35293	0.521721	7.49492	1.74258	1.73095	0.332973	0.613371
51.9	0.580295	0.319807	0.256485	0.70111	0.352867	43.9705	3.79071	0.522206	6.35849	1.6679	1.73323	0.330264	0.613077
49.7	0.594169	0.319262	0.254882	0.7203	0.363759	44.6192	3.86108	0.536226	6.54781	1.65224	1.69876	0.346935	0.618765
47.9	0.587163	0.323153	0.260308	0.703714	0.360099	43.8212	4.20123	0.523746	7.07184	1.72428	1.72377	0.338914	0.618564
47.3	0.596437	0.321774	0.256918	0.723152	0.362115	44.3948	4.14013	0.533443	7.12019	1.68811	1.70872	0.343415	0.614649
45.2	0.607359	0.321043	0.255877	0.741933	0.373774	46.2865	3.73317	0.540187	6.12083	1.62161	1.69664	0.344213	0.624307
50.2	0.569222	0.306023	0.250739	0.685466	0.3613	43.5716	4.3	0.521201	7.50099	1.76366	1.72597	0.33631	0.615547
49.3	0.571038	0.309421	0.25499	0.687735	0.358667	43.2192	4.39321	0.526243	7.26478	1.72587	1.71636	0.342088	0.620533
45.1	0.601526	0.334479	0.262648	0.716149	0.357479	43.3964	4.51339	0.518826	7.90935	1.78392	1.73158	0.335658	0.610734
50.6	0.602172	0.327815	0.259388	0.732323	0.361698	44.9313	3.99197	0.52722	6.72876	1.68656	1.71599	0.338584	0.615314
52.8	0.600162	0.332784	0.263227	0.714224	0.35696	43.6135	4.36397	0.519883	7.41705	1.77339	1.73657	0.340273	0.619592
49.6	0.595993	0.326442	0.261417	0.713382	0.368424	44.6431	4.53002	0.520778	7.49085	1.76194	1.73131	0.3361	0.619879
51.4	0.558979	0.310245	0.256119	0.679866	0.350139	42.6166	4.34239	0.51513	7.25857	1.77564	1.7424	0.339331	0.614852
47.3	0.577765	0.318373	0.256903	0.700904	0.367073	44.6222	4.62349	0.520081	7.96249	1.80176	1.72854	0.333678	0.612516
51.5	0.582159	0.323799	0.259368	0.700357	0.354508	43.5169	4.7236	0.51246	8.17258	1.81357	1.74635	0.323688	0.616378
47.7	0.572806	0.325481	0.263182	0.681893	0.351873	42.5143	4.10475	0.509753	7.17677	1.77369	1.74622	0.329271	0.614091
49.1	0.559785	0.301662	0.250014	0.69264	0.353341	43.5726	4.46318	0.512199	8.06715	1.82014	1.74009	0.327704	0.61124
45.3	0.543663	0.297981	0.252024	0.673495	0.354946	43.9101	4.32194	0.499543	7.68722	1.84249	1.77179	0.316388	0.614114
53.1	0.545854	0.296008	0.24762	0.660869	0.346487	42.5634	4.27326	0.508669	7.61075	1.7947	1.75472	0.323937	0.610646
45.6	0.545846	0.294211	0.247774	0.668382	0.352492	43.2117	4.37542	0.503174	7.77429	1.84166	1.75951	0.324193	0.614293
46.4	0.53872	0.299087	0.248232	0.649777	0.346736	41.8987	4.17354	0.498352	7.40988	1.81555	1.77286	0.31562	0.615298
51.3	0.544046	0.297692	0.248767	0.660704	0.345187	42.923	4.38526	0.497906	7.65457	1.84044	1.77561	0.315186	0.611974
49.3	0.490354	0.284554	0.246721	0.591432	0.329649	39.1072	3.72619	0.508077	6.1518	1.69162	1.7666	0.319424	0.623918
44.7	0.516688	0.283969	0.247062	0.633395	0.341684	41.2449	4.43612	0.513109	7.66848	1.7823	1.7429	0.334187	0.615972
43.4	0.546967	0.297514	0.25122	0.673949	0.351047	42.9542	4.31445	0.513199	7.35243	1.77628	1.74707	0.330341	0.61558
47.2	0.53796	0.293246	0.248852	0.659833	0.347545	42.2907	4.37434	0.504707	7.72313	1.81995	1.75887	0.322919	0.609339
49.5	0.557677	0.303056	0.25152	0.671886	0.352231	42.5195	4.15189	0.51096	7.30633	1.79452	1.74781	0.332228	0.611962
48.2	0.535734	0.297625	0.250052	0.651469	0.347693	41.7832	4.48834	0.506437	7.81703	1.82729	1.75642	0.329018	0.614021
49.3	0.547999	0.309025	0.258073	0.663556	0.344104	41.3353	4.37526	0.512939	7.52602	1.82576	1.74238	0.339705	0.613634
49.4	0.579336	0.318523	0.254596	0.701333	0.368612	44.2891	4.90349	0.526914	8.62792	1.80615	1.71464	0.33648	0.60355
51.2	0.624647	0.344335	0.267193	0.75189	0.363206	44.7819	4.04327	0.542964	6.88979	1.66453	1.6818	0.357862	0.62415
49.1	0.622364	0.33294	0.26694	0.762015	0.378183	46.6725	3.53114	0.562541	5.59071	1.53349	1.64231	0.364547	0.626512
48.8	0.622417	0.337365	0.264556	0.756702	0.373821	46.1678	4.04437	0.550167	6.86191	1.63945	1.6654	0.355347	0.620847
49.8	0.603811	0.335256	0.263894	0.727062	0.365499	44.721	3.73611	0.539945	6.29027	1.63771	1.69275	0.349557	0.620411
46.7	0.615724	0.333391	0.259744	0.741994	0.35951	45.3074	3.89941	0.529473	6.6258	1.67109	1.71864	0.336352	0.615954
47.8	0.551825	0.303052	0.254891	0.680945	0.362016	43.8423	4.06234	0.549009	6.6656	1.63675	1.67612	0.35854	0.622359
47.6	0.602673	0.326381	0.257852	0.734557	0.358584	44.6914	4.06722	0.541593	7.00104	1.68346	1.68155	0.357493	0.614562
49	0.606397	0.324037	0.256494	0.733804	0.362453	45.379	4.29177	0.517417	7.45712	1.77612	1.7391	0.334123	0.612951
50.6	0.590534	0.319661	0.254381	0.71021	0.358535	44.1666	4.47394	0.515172	8.01115	1.8173	1.74375	0.329933	0.608773
52	0.58084	0.310084	0.252287	0.699917	0.353076	43.7191	4.52774	0.51359	7.93614	1.8	1.74313	0.328567	0.609395
53.9	0.593683	0.326531	0.259592	0.712864	0.360766	43.7835	4.5042	0.527901	7.90913	1.7761	1.71106	0.346862	0.612705
47.6	0.60222	0.319703	0.256823	0.736234	0.364924	45.2744	3.96874	0.532014	6.79104	1.6839	1.70704	0.339367	0.615815
47.5	0.58627	0.314171	0.254475	0.709806	0.35971	44.0914	4.27641	0.518215	7.55111	1.80038	1.73737	0.339522	0.612391
44.5	0.571344	0.30506	0.249129	0.691775	0.358234	44.1337	4.96183	0.502097	8.87068	1.90472	1.76432	0.322911	0.604141
48.7	0.59274	0.317722	0.257978	0.721354	0.360529	44.4365	4.28822	0.512631	7.34368	1.80136	1.74572	0.33269	0.613885
51.7	0.557	0.306014	0.248852	0.678474	0.365809	44.2424	5.1949	0.510589	9.12881	1.89519	1.75303	0.328712	0.608767
43.6	0.601359	0.314006	0.254261	0.739099	0.373984	46.3229	3.7973	0.546935	6.40136	1.60108	1.6747	0.344105	0.617725
45.6	0.594993	0.318892	0.257311	0.72823	0.358386	44.8039	3.41579	0.548365	5.3515	1.52674	1.6768	0.348944	0.62636
51.2	0.583077	0.316713	0.255158	0.708143	0.36872	45.0489	4.32328	0.536869	7.4696	1.69665	1.69123	0.343656	0.61416
50.8	0.495717	0.291618	0.25214	0.602947	0.336116	39.6351	4.05313	0.528374	6.9009	1.70114	1.71527	0.345167	0.61902
45.4	0.570907	0.299965	0.246692	0.704486	0.351486	44.0404	4.43331	0.513088	7.80987	1.8054	1.74798	0.332291	0.609171
47.6	0.548982	0.297366	0.24765	0.667874	0.351913	42.794	4.93753	0.501301	8.692	1.89016	1.76371	0.32516	0.610005
49.5	0.569701	0.306696	0.253051	0.695871	0.347131	43.1619	4.23074	0.51166	7.33819	1.79834	1.75221	0.338118	0.615111
51.3	0.624929	0.328731	0.256877	0.763925	0.368659	46.3908	3.79313	0.531377	6.33919	1.65739	1.71002	0.337724	0.617744
45.8	0.552184	0.298931	0.255004	0.681357	0.352718	43.2014	4.43959	0.510817	7.56168	1.81222	1.74921	0.331948	0.621518
48.8	0.586688	0.302171	0.249067	0.725716	0.363064	45.006	3.8116	0.544014	6.49527	1.63908	1.68144	0.35162	0.62183
51.6	0.591811	0.315142	0.256389	0.721055	0.365827	44.988	3.91162	0.529753	6.46677	1.67923	1.71804	0.34188	0.621127
49.1	0.595843	0.31835	0.255642	0.734213	0.360787	44.6229	4.24875	0.537847	7.21154	1.69498	1.69614	0.348379	0.615144
46	0.580125	0.314084	0.256529	0.702295	0.36253	43.9933	4.37868	0.523526	7.57683	1.77507	1.72775	0.340716	0.611212
48	0.568527	0.302917	0.250244	0.701345	0.3525	43.8182	4.56658	0.512121	7.92575	1.8128	1.74887	0.329525	0.616225
48.5	0.57422	0.30262	0.251259	0.711325	0.363255	44.2156	4.08225	0.53389	6.63287	1.67485	1.70206	0.349977	0.622548
47	0.578689	0.306788	0.248859	0.716845	0.376369	45.9014	4.61797	0.529653	8.12867	1.77149	1.7086	0.339403	0.610109
51.6	0.626344	0.347095	0.264157	0.739413	0.388737	46.1204	4.25025	0.595119	6.90813	1.5985	1.57121	0.404102	0.634142
57.1	0.639664	0.359608	0.273161	0.752881	0.401191	46.4057	3.83045	0.623838	5.62616	1.44686	1.52211	0.429707	0.644835
62	0.629333	0.358645	0.273408	0.745583	0.392093	46.3145	4.62112	0.5973	7.28219	1.59712	1.55661	0.410726	0.636331
45.6	0.619776	0.344383	0.263066	0.746464	0.391747	46.341	4.19693	0.608821	6.02857	1.50604	1.55208	0.42392	0.650184
52.3	0.593789	0.327842	0.25605	0.718694	0.375324	44.8216	4.63364	0.581319	7.43289	1.68889	1.59404	0.412727	0.645562
48.1	0.61911	0.340768	0.260145	0.741721	0.3881	46.0351	4.16239	0.601159	6.43168	1.5582	1.55835	0.413532	0.643582
53.3	0.59747	0.33569	0.257171	0.718388	0.381542	45.1677	4.42034	0.593871	7.33282	1.61767	1.57113	0.408256	0.633876
50.8	0.625125	0.338153	0.258411	0.755249	0.394455	47.159	3.8534	0.583747	6.24587	1.54531	1.59024	0.378592	0.622944
50.6	0.604348	0.330155	0.255193	0.7278	0.390317	46.1377	3.91641	0.589063	6.2997	1.53976	1.5814	0.387176	0.62517
54.3	0.592515	0.314133	0.251903	0.724162	0.385704	46.2594	3.97126	0.585956	6.54461	1.57955	1.58628	0.388385	0.632722
54.4	0.621368	0.342927	0.264883	0.740597	0.38785	45.9936	4.3352	0.592371	6.79085	1.61363	1.5775	0.411183	0.642709
52.6	0.652663	0.356946	0.26518	0.784072	0.401462	48.5459	3.88079	0.602171	6.0925	1.50978	1.55638	0.406513	0.63667
49.1	0.591196	0.319715	0.253797	0.727055	0.385898	45.6094	3.97909	0.596968	6.35875	1.59035	1.56653	0.415693	0.645351
50.1	0.612616	0.327051	0.2546	0.743771	0.39219	47.318	3.97961	0.597359	6.19974	1.53352	1.56816	0.403792	0.640246
45.7	0.58155	0.327007	0.255599	0.704826	0.391056	45.0589	4.217	0.605636	6.34034	1.5435	1.54851	0.419828	0.647303
52.8	0.594428	0.326466	0.253659	0.724127	0.38818	45.933	4.45906	0.594552	7.1019	1.62393	1.56708	0.419324	0.646442
53.8	0.689833	0.379013	0.279498	0.808212	0.419354	50.0753	4.0901	0.609401	6.39563	1.52299	1.53405	0.407223	0.633585
54.2	0.686437	0.381154	0.282839	0.800251	0.408911	48.6619	4.29173	0.599909	6.43615	1.56577	1.55832	0.407667	0.644916
49.6	0.664454	0.376079	0.279676	0.777841	0.398302	47.883	4.08012	0.595252	6.14355	1.52075	1.57591	0.394104	0.633776
56	0.671504	0.379967	0.281951	0.786387	0.394257	48.1515	3.59485	0.599791	5.26277	1.44	1.5616	0.395459	0.63691
58.2	0.68659	0.384233	0.281913	0.802624	0.413706	49.5634	3.78855	0.616835	5.52151	1.40826	1.52785	0.409284	0.634376
53.4	0.701309	0.397314	0.293415	0.807178	0.424739	50.6898	4.00381	0.596309	6.02214	1.49974	1.56711	0.387327	0.63116
51.7	0.689368	0.387061	0.286248	0.798235	0.421362	50.0448	3.9338	0.597144	5.73989	1.47056	1.56828	0.382931	0.628301
56.6	0.709081	0.398784	0.289913	0.824992	0.4177	50.5328	4.01178	0.595811	6.07054	1.4854	1.56739	0.381487	0.624664
56	0.659202	0.366028	0.27573	0.766725	0.402692	47.882	3.9453	0.591534	5.90539	1.51088	1.581	0.383659	0.629069
50.9	0.672275	0.36967	0.275787	0.784299	0.401844	48.2906	4.21025	0.595598	6.37785	1.54689	1.56822	0.397166	0.635345
52.3	0.685291	0.392094	0.292982	0.789836	0.408942	48.4223	4.28544	0.598547	6.65884	1.57583	1.55917	0.406989	0.637455
54.7	0.683018	0.384496	0.283806	0.803671	0.407649	49.5883	4.14004	0.58308	6.57437	1.57558	1.59082	0.388587	0.63025
53	0.668137	0.373017	0.281271	0.784266	0.404582	48.2769	4.27825	0.584526	6.34176	1.59659	1.59798	0.398184	0.647887
48.2	0.667936	0.365833	0.276349	0.792128	0.410912	49.3222	3.92486	0.608822	5.93811	1.49013	1.53891	0.411002	0.641047
48.3	0.626869	0.340136	0.263188	0.753057	0.398412	47.4142	4.09476	0.591576	6.44391	1.58502	1.56799	0.39946	0.642946
55.9	0.669959	0.372341	0.274839	0.79093	0.409333	49.4049	4.16789	0.603523	6.45698	1.51291	1.54315	0.407818	0.637788
54.2	0.672782	0.378174	0.284427	0.789296	0.396595	48.1264	4.27669	0.575992	6.78123	1.62308	1.60792	0.386778	0.639814
51.5	0.650669	0.371626	0.285131	0.758647	0.386059	46.421	4.28822	0.569657	7.03049	1.67703	1.61775	0.377596	0.63492
52.9	0.648476	0.353379	0.266418	0.776944	0.399463	48.4811	4.08994	0.57991	6.64297	1.5845	1.59741	0.3769	0.629882
48.8	0.642532	0.34524	0.264669	0.770729	0.399716	48.3491	3.97774	0.57058	6.24768	1.59098	1.62063	0.367055	0.633494
55.1	0.640324	0.348648	0.264883	0.751783	0.389992	47.0872	4.01461	0.579612	6.35442	1.57744	1.59418	0.382717	0.635844
51.5	0.658388	0.356215	0.267489	0.773982	0.40084	48.2212	4.13204	0.580462	6.66288	1.59815	1.59453	0.381626	0.626541
51.3	0.628943	0.353476	0.270549	0.729191	0.387002	45.9185	4.4934	0.556102	7.33857	1.70819	1.65363	0.358258	0.625419
52.4	0.669527	0.370376	0.274702	0.78573	0.402856	48.971	4.00691	0.573871	6.36302	1.56892	1.61186	0.368136	0.626902
54.3	0.573827	0.336357	0.264509	0.659936	0.377691	43.4661	4.98061	0.564078	7.88468	1.69304	1.63795	0.36858	0.624632
51.7	0.605388	0.334876	0.258125	0.717929	0.393601	46.4024	4.63277	0.583596	7.27428	1.61541	1.59355	0.389066	0.627631
53.2	0.648006	0.351819	0.267484	0.765942	0.398084	47.9355	4.15064	0.5797	6.31542	1.57383	1.61071	0.376423	0.634854
51.8	0.641133	0.347034	0.26318	0.756669	0.391844	47.2654	4.01959	0.591406	6.08286	1.51009	1.57969	0.389962	0.632529
54.3	0.63963	0.348898	0.263903	0.75319	0.396724	47.2575	3.92854	0.59073	6.33012	1.57456	1.57515	0.396707	0.638485
49.7	0.617024	0.342366	0.26295	0.72433	0.392815	46.4463	4.19131	0.582143	6.62452	1.5972	1.58962	0.389362	0.638338
50.5	0.623817	0.345283	0.267462	0.732922	0.391577	46.415	4.41923	0.572951	7.23356	1.68776	1.60119	0.39002	0.64596
52.6	0.672094	0.379147	0.280513	0.782766	0.41293	49.1844	3.76631	0.61689	5.71795	1.42277	1.51674	0.411136	0.635944
57.1	0.696782	0.396465	0.292853	0.816376	0.408085	49.2108	4.21723	0.600102	6.47571	1.53895	1.55227	0.404996	0.637733
53.3	0.700728	0.394219	0.288115	0.823285	0.421603	50.8835	3.61093	0.617793	5.52104	1.41385	1.50704	0.404097	0.632962
56.3	0.698879	0.40297	0.294546	0.819025	0.412602	49.7422	3.87448	0.614504	6.00692	1.46071	1.52287	0.406089	0.633874
53.5	0.697371	0.400596	0.292558	0.818408	0.414061	50.0051	3.66732	0.616766	5.53821	1.42573	1.52664	0.402989	0.635693
49.8	0.681116	0.388063	0.288952	0.792558	0.397887	48.5134	4.02415	0.572255	6.14272	1.56376	1.61796	0.373729	0.634155
51.8	0.650915	0.350188	0.269011	0.77601	0.402639	48.5336	3.72291	0.604675	5.68167	1.45148	1.54629	0.388982	0.631538
50.1	0.678845	0.379913	0.279424	0.794751	0.405043	48.5906	3.99462	0.592639	6.19072	1.53048	1.57798	0.385285	0.627994
51	0.69057	0.386176	0.283833	0.806155	0.395411	48.9571	4.43276	0.56225	6.95219	1.63477	1.64284	0.363886	0.623769
56.4	0.655502	0.372008	0.280671	0.755519	0.389338	46.9458	4.27856	0.55998	6.80587	1.66943	1.64324	0.363187	0.629197
54.3	0.657198	0.363622	0.273367	0.763698	0.393455	47.8035	4.38375	0.564648	6.98915	1.63262	1.63486	0.359575	0.626811
58.4	0.661493	0.378251	0.284334	0.762691	0.403388	47.8523	4.30946	0.585288	6.78869	1.60418	1.58568	0.385649	0.63187
51.8	0.681119	0.375314	0.27564	0.802565	0.408939	49.7717	4.2928	0.588359	6.67213	1.55051	1.58512	0.380033	0.628975
52.7	0.649522	0.350264	0.264004	0.769537	0.399601	48.1472	4.28165	0.581489	6.54293	1.59888	1.59337	0.387807	0.638632
48.7	0.634653	0.336991	0.259126	0.749443	0.393286	47.2914	4.1273	0.578158	6.61104	1.62372	1.59762	0.387778	0.635491
53.4	0.65296	0.348784	0.261942	0.778062	0.399507	48.8517	3.97951	0.583121	6.24588	1.55736	1.59243	0.381399	0.635813
56.7	0.62578	0.351819	0.265344	0.732911	0.399105	47.2646	3.91652	0.603881	6.09309	1.4808	1.55359	0.391905	0.631956
53.3	0.66248	0.355667	0.26488	0.782937	0.405277	49.2274	3.70842	0.588178	5.87439	1.47707	1.57737	0.370049	0.623334
56.7	0.658964	0.361485	0.270263	0.780265	0.396096	48.7078	3.64059	0.573875	5.46759	1.48429	1.62357	0.360594	0.630649
54.1	0.645652	0.357201	0.268302	0.760826	0.393758	47.6314	4.00435	0.585783	6.51935	1.54772	1.58224	0.374967	0.62473
53.8	0.574184	0.325294	0.258016	0.671949	0.373554	44.1302	4.63834	0.571211	7.30395	1.61853	1.62452	0.372284	0.628921
49.6	0.64286	0.342845	0.259469	0.762362	0.398249	48.1418	4.01946	0.581258	5.8215	1.51419	1.60675	0.375385	0.632756
50.3	0.621074	0.334564	0.258577	0.746857	0.365615	45.2873	3.77953	0.577892	5.95437	1.52479	1.6011	0.369181	0.627054
50.1	0.628532	0.339655	0.260687	0.756858	0.372437	46.0512	3.69261	0.582989	5.69909	1.50444	1.59133	0.373442	0.631017
53.6	0.69253	0.386648	0.28309	0.816049	0.400007	49.3563	3.91711	0.588468	6.23527	1.50693	1.5785	0.378421	0.623385
51.4	0.630892	0.34221	0.263125	0.747698	0.391911	47.0602	3.99118	0.572072	6.36369	1.59186	1.61435	0.366636	0.630676
51.2	0.658438	0.348567	0.259924	0.783774	0.405155	49.6349	3.75698	0.585534	5.88563	1.47326	1.59371	0.363581	0.61818
56.3	0.673835	0.373931	0.276233	0.791485	0.405869	49.303	3.79688	0.592168	5.73872	1.47539	1.58076	0.371513	0.628699
51.6	0.682059	0.376735	0.274991	0.808086	0.418038	49.9465	3.98478	0.613083	6.08108	1.44867	1.53438	0.397503	0.628006
50.4	0.646459	0.353908	0.265963	0.762637	0.399463	47.8918	4.13448	0.589226	6.40834	1.54475	1.57433	0.383459	0.632378
49.3	0.635217	0.336069	0.25782	0.758808	0.396579	47.9014	3.99951	0.577855	6.30365	1.59356	1.6058	0.379813	0.640067
52.7	0.621426	0.322844	0.252689	0.751786	0.399315	48.3099	4.29499	0.582069	6.7635	1.56304	1.59368	0.373751	0.628933
48.9	0.639069	0.341388	0.257595	0.766069	0.404205	49.0475	3.55621	0.594311	5.70306	1.46385	1.55616	0.379911	0.62577
60.3	0.676811	0.393015	0.290996	0.782314	0.390829	47.0777	3.43534	0.615486	5.84171	1.37319	1.50267	0.401144	0.605202
58.2	0.691175	0.401515	0.296944	0.790764	0.407924	48.8639	2.85666	0.657193	4.54267	1.19342	1.4139	0.438987	0.626491
56.4	0.663072	0.387834	0.287104	0.766425	0.405668	48.6197	2.66136	0.65705	4.22062	1.1787	1.41638	0.441932	0.633982
47.6	0.677939	0.391388	0.287285	0.789769	0.412829	49.4523	2.80531	0.645492	4.26458	1.21222	1.4543	0.438641	0.637426
50.6	0.652277	0.368516	0.275712	0.758542	0.401197	48.4309	2.58312	0.62991	4.03868	1.24573	1.48002	0.426775	0.637547
53.7	0.676427	0.388086	0.284637	0.779503	0.41059	49.027	2.90366	0.647897	4.7454	1.23692	1.4285	0.441004	0.629951
51.9	0.65501	0.36753	0.272346	0.761575	0.394743	48.2222	2.5208	0.648191	4.02257	1.18151	1.43564	0.434792	0.633116
49.2	0.686405	0.393026	0.28534	0.798424	0.416225	49.879	2.43785	0.624015	4.2035	1.23099	1.48304	0.403284	0.608712
51.7	0.675538	0.392102	0.288287	0.779329	0.413669	49.2351	2.33118	0.610523	3.84865	1.23335	1.52354	0.385997	0.610568
47.4	0.641222	0.351711	0.262424	0.766204	0.384732	47.2491	2.23475	0.628293	3.73677	1.16243	1.46069	0.399576	0.610677
56.2	0.639822	0.368644	0.275789	0.747458	0.354109	44.7512	2.00545	0.644864	3.25916	1.11275	1.43296	0.422976	0.62586
56.1	0.686711	0.395851	0.288497	0.802301	0.390956	48.2022	2.58794	0.637803	4.35509	1.19959	1.45712	0.414368	0.608636
47.4	0.659264	0.36826	0.273609	0.778278	0.392217	48.4856	2.49108	0.604091	4.25981	1.29466	1.53049	0.389949	0.615783
49.9	0.667788	0.376134	0.280925	0.7836	0.404559	49.2567	3.10415	0.593938	5.11975	1.35865	1.56829	0.372514	0.602187
48.5	0.636133	0.369985	0.279122	0.746524	0.391746	47.0203	4.6981	0.588752	8.17855	1.60422	1.56458	0.386522	0.59737
53.5	0.666746	0.382758	0.286007	0.780652	0.404357	48.5895	4.61714	0.556817	8.27001	1.69975	1.63197	0.366815	0.585457
56.3	0.739474	0.438836	0.317001	0.852437	0.43399	51.2247	3.34955	0.626617	5.82959	1.34778	1.4637	0.408444	0.593249
51.6	0.739416	0.437085	0.317393	0.841595	0.412523	50.193	2.49774	0.644955	3.88861	1.18399	1.45095	0.431505	0.63419
54.6	0.712608	0.420315	0.309034	0.814544	0.411808	49.8271	2.44858	0.637583	3.82486	1.197	1.46986	0.422493	0.633455
56.8	0.730296	0.436932	0.318408	0.831963	0.420695	50.5709	2.31409	0.647897	3.64931	1.13903	1.44749	0.42448	0.62302
57.1	0.732186	0.433486	0.315666	0.835544	0.438485	51.6335	2.10924	0.661746	3.06181	1.07825	1.41507	0.435278	0.632792
52.8	0.738102	0.438737	0.320901	0.836633	0.434489	51.4759	2.3045	0.667097	3.54999	1.0968	1.39937	0.44777	0.629993
55.7	0.727568	0.427217	0.312217	0.825875	0.427802	51.1577	2.49307	0.652878	3.91891	1.17142	1.42574	0.438119	0.623969
56.6	0.743182	0.444371	0.322455	0.844347	0.432647	51.3992	2.90496	0.638371	4.81052	1.25004	1.456	0.421019	0.604418
55.2	0.719591	0.430851	0.316883	0.816171	0.407853	49.8372	2.45844	0.614577	3.95099	1.23272	1.51154	0.393951	0.614351
56.5	0.721555	0.426729	0.312139	0.819912	0.408805	49.7786	2.9907	0.616681	5.02447	1.30457	1.51109	0.399698	0.605292
51.9	0.742583	0.456567	0.335684	0.837232	0.410148	49.475	2.67366	0.621205	4.34805	1.25408	1.49801	0.409334	0.618558
51.4	0.724176	0.437418	0.32027	0.829508	0.411408	49.9889	2.82267	0.603957	4.79185	1.3122	1.5416	0.385304	0.604141
52.8	0.723443	0.430067	0.315856	0.828304	0.415074	50.1163	2.87981	0.598892	4.69067	1.32885	1.55592	0.386721	0.616382
53.9	0.71784	0.420292	0.310511	0.83067	0.421531	50.6598	3.14453	0.609476	5.37123	1.36685	1.5238	0.399156	0.607362
54.5	0.680327	0.397185	0.294973	0.796215	0.405057	49.1594	4.86785	0.567697	8.82391	1.71073	1.60709	0.37284	0.584952
58.8	0.721872	0.435892	0.320053	0.828393	0.418181	50.0226	4.70181	0.576744	8.41836	1.64766	1.58473	0.376961	0.578192
55.6	0.7284	0.432322	0.314413	0.83995	0.420278	50.5024	2.93621	0.626772	4.94715	1.30274	1.48013	0.424355	0.623392
55.9	0.713772	0.425857	0.316642	0.812473	0.402692	49.1433	2.73677	0.608646	4.50183	1.33021	1.52516	0.413199	0.637592
49.6	0.680798	0.385868	0.285128	0.791987	0.410367	49.418	2.46037	0.627304	3.8102	1.21914	1.48415	0.41221	0.630995
51.6	0.694097	0.390976	0.285893	0.809408	0.414386	50.1404	2.44005	0.625196	3.97718	1.22213	1.48433	0.403475	0.620095
54.9	0.697899	0.400582	0.294321	0.795456	0.404015	49.2168	2.27071	0.635907	3.58185	1.18903	1.46899	0.424065	0.633805
50.4	0.701662	0.397996	0.290999	0.805284	0.4186	50.061	2.84591	0.637265	4.61949	1.26928	1.46457	0.435637	0.629524
49.9	0.68249	0.391311	0.290604	0.775125	0.396859	48.3859	2.94911	0.611038	4.74189	1.342	1.51909	0.414622	0.633289
55.5	0.704246	0.409183	0.299119	0.80919	0.419489	50.2138	3.01646	0.627506	5.04795	1.31301	1.47762	0.419098	0.619633
53.7	0.639071	0.379804	0.287376	0.731234	0.386543	47.2315	4.22415	0.596678	7.1524	1.50122	1.54821	0.39998	0.610536
48.2	0.679332	0.39071	0.288191	0.784865	0.396347	48.2329	4.44244	0.593411	7.94237	1.54359	1.55123	0.386126	0.588758
49.5	0.69948	0.405878	0.297688	0.803129	0.396782	48.6678	2.95374	0.600634	5.07886	1.33499	1.54487	0.381178	0.601033
55.2	0.698037	0.407192	0.29872	0.802116	0.394809	48.717	3.62335	0.586352	6.31338	1.46815	1.57965	0.376689	0.596602
53.4	0.69287	0.405005	0.29834	0.794519	0.402397	48.9973	3.43793	0.573971	6.00765	1.49601	1.602	0.365718	0.600134
50.7	0.665662	0.387227	0.28974	0.764574	0.396105	47.904	3.59611	0.578756	6.20567	1.48587	1.58672	0.371684	0.603475
54.2	0.680309	0.40364	0.301707	0.781273	0.398986	48.272	5.32952	0.540965	9.94431	1.8749	1.65616	0.359226	0.583596
52.5	0.728685	0.442127	0.325602	0.831409	0.423531	50.0518	3.7937	0.6086	6.54944	1.42326	1.51682	0.387754	0.583741
53.6	0.749	0.456425	0.331078	0.859132	0.436633	51.506	2.41058	0.64653	3.97243	1.17395	1.43459	0.428095	0.616734
56.3	0.747402	0.447761	0.323877	0.856009	0.441985	52.0894	2.09283	0.674661	3.26934	1.06827	1.37438	0.452339	0.628575
54.8	0.740588	0.452005	0.330891	0.843438	0.427475	50.834	2.27948	0.669961	3.47241	1.11146	1.38855	0.455715	0.639323
52	0.737396	0.444816	0.322279	0.847244	0.433074	51.4353	2.10283	0.675514	3.19189	1.06182	1.38187	0.449395	0.632797
56	0.722256	0.432305	0.317488	0.817291	0.410758	49.9423	2.18434	0.618856	3.38042	1.18419	1.50588	0.395617	0.626739
51.4	0.694455	0.391215	0.285868	0.807969	0.422377	50.6983	2.31546	0.665149	3.45632	1.11412	1.39875	0.448313	0.639178
55.7	0.715293	0.413283	0.299085	0.826876	0.428779	50.9867	2.39352	0.655734	3.69289	1.13563	1.41411	0.428644	0.621961
52.2	0.711279	0.411195	0.300265	0.821973	0.417867	50.4666	3.73248	0.597841	6.5953	1.45649	1.54394	0.386246	0.597094
55	0.702039	0.421967	0.311234	0.79667	0.405447	49.1512	3.94029	0.560524	7.17044	1.60134	1.62245	0.361471	0.594718
56.8	0.691955	0.403354	0.297012	0.790423	0.414878	49.9725	3.8118	0.568319	6.83469	1.53985	1.60552	0.356287	0.581258
61.5	0.687475	0.414529	0.305933	0.793157	0.417051	49.8031	4.32816	0.57943	8.04253	1.59146	1.57708	0.369701	0.567128
58.1	0.701333	0.410007	0.30601	0.814744	0.426771	50.8114	4.08347	0.543011	7.50674	1.65487	1.67088	0.339369	0.565451
54.9	0.668052	0.375253	0.288034	0.781141	0.413855	49.7842	4.36524	0.520154	7.98099	1.75652	1.72252	0.325102	0.580379
54.7	0.660004	0.364189	0.276314	0.765825	0.409925	49.6839	3.50053	0.556987	6.2063	1.54656	1.64008	0.35369	0.597845
56.6	0.69276	0.393645	0.291443	0.80427	0.417133	49.843	3.87522	0.550784	6.91641	1.60982	1.65665	0.344318	0.59343
57.6	0.659276	0.384031	0.289499	0.769822	0.399946	48.1064	4.24115	0.542805	7.70942	1.67365	1.67672	0.34116	0.581007
59.3	0.67787	0.38617	0.281976	0.795584	0.413673	50.3122	2.33659	0.613576	3.99656	1.20707	1.50792	0.375233	0.589825
57.3	0.67644	0.384294	0.284151	0.78897	0.412297	50.0419	2.13921	0.619682	3.49827	1.16	1.50317	0.38408	0.603076
58.9	0.656019	0.367895	0.276256	0.757297	0.401489	48.894	2.15121	0.615806	3.56752	1.19938	1.50676	0.392776	0.616232
54.4	0.607259	0.33889	0.26221	0.702358	0.387994	46.9802	3.36725	0.610371	5.54245	1.37431	1.51768	0.404178	0.616537
52.8	0.681484	0.380184	0.276856	0.793207	0.419389	50.2034	2.44066	0.633217	3.61448	1.18765	1.48355	0.414072	0.626729
55.3	0.670589	0.367655	0.272266	0.780271	0.408006	49.3902	2.88589	0.619701	4.61674	1.28555	1.50207	0.406279	0.622693
52.9	0.678156	0.37258	0.274452	0.792024	0.418171	50.3085	2.44499	0.626558	3.92707	1.22078	1.48164	0.406817	0.618998
54.2	0.724763	0.419322	0.303246	0.835114	0.433403	51.4159	2.46304	0.638609	4.05242	1.19361	1.45132	0.4158	0.614133
54.2	0.673777	0.378758	0.282347	0.782791	0.40994	49.8661	2.4504	0.578164	4.24406	1.32964	1.59131	0.355032	0.59972
57.3	0.676354	0.37481	0.27862	0.787666	0.421942	50.7646	2.4152	0.590774	4.08367	1.27621	1.56761	0.36038	0.596652
53.5	0.707856	0.410445	0.297999	0.81594	0.422822	50.5248	2.12228	0.626787	3.48819	1.136	1.48677	0.381837	0.602718
55.5	0.717239	0.417968	0.302547	0.831428	0.421525	50.4209	2.06429	0.633949	3.27779	1.12063	1.47033	0.399232	0.610625
52.3	0.686763	0.393044	0.291127	0.789612	0.431069	51.0205	3.24038	0.575787	5.68816	1.43526	1.6065	0.355722	0.588358
54.3	0.686046	0.380301	0.280439	0.787317	0.450146	52.2092	2.8632	0.56499	4.85491	1.425	1.62927	0.350809	0.61357
49.7	0.643699	0.351992	0.268817	0.762059	0.422677	50.1184	3.69745	0.546057	6.7213	1.61516	1.65574	0.341697	0.579922
53.2	0.653332	0.368734	0.280114	0.777503	0.409206	48.928	3.1581	0.573887	5.6183	1.45043	1.59696	0.36161	0.577546
65.2	0.679408	0.408808	0.308093	0.773383	0.378819	46.8675	2.05165	0.657187	3.8259	1.13197	1.42106	0.398213	0.467826
58.3	0.686092	0.414901	0.31436	0.776137	0.374626	46.484	1.90447	0.663761	3.45366	1.08988	1.41682	0.405915	0.472674
62.5	0.65934	0.399238	0.306355	0.751172	0.361691	45.3762	1.76634	0.667432	3.18057	1.04567	1.40908	0.402104	0.470814
54.7	0.67673	0.404371	0.307919	0.773708	0.37382	46.859	1.93486	0.664016	3.43959	1.05689	1.42028	0.392426	0.462735
64.4	0.665508	0.396152	0.303604	0.762154	0.360644	45.3139	2.18894	0.643749	3.97717	1.17689	1.458	0.387463	0.461812
60.6	0.689931	0.405016	0.308071	0.779714	0.363605	46.1383	2.08307	0.643422	3.83015	1.14944	1.45574	0.377263	0.454026
56.6	0.678444	0.3983	0.29964	0.77918	0.368156	46.31	2.19401	0.651897	4.05646	1.14734	1.43652	0.388484	0.461593
59.8	0.688687	0.410184	0.30825	0.79266	0.37969	47.215	2.03213	0.659653	3.66888	1.10763	1.42347	0.396474	0.466361
61.8	0.677234	0.412479	0.312148	0.77526	0.37283	46.0378	2.24535	0.646194	4.11243	1.17861	1.45327	0.387565	0.462087
59	0.664292	0.38808	0.29356	0.76645	0.375947	46.7532	2.24333	0.648387	4.22733	1.17221	1.44219	0.385126	0.459011
63.3	0.675787	0.405578	0.309736	0.761506	0.354638	45.0682	2.33382	0.643461	4.27019	1.19463	1.45351	0.386291	0.461135
63.7	0.701422	0.420004	0.314074	0.804073	0.382478	47.4604	2.16315	0.642737	3.9944	1.18429	1.45645	0.386673	0.461095
57	0.680066	0.404354	0.303513	0.785057	0.365831	45.7875	2.18449	0.64223	4.08248	1.18367	1.45792	0.383092	0.458515
62.7	0.679769	0.404798	0.302333	0.78326	0.369528	46.7803	2.03292	0.656807	3.59325	1.10225	1.43244	0.39324	0.464455
58.5	0.671045	0.413005	0.312698	0.76635	0.364421	44.944	2.32309	0.651152	4.23533	1.18361	1.44255	0.399209	0.469379
63	0.696373	0.422283	0.317154	0.792043	0.378743	46.8089	2.23725	0.646054	4.08644	1.17461	1.45093	0.387864	0.462945
60.8	0.718333	0.433132	0.324331	0.81251	0.38528	48.3402	1.85099	0.653841	3.36106	1.08883	1.43762	0.38709	0.459377
62.4	0.729958	0.444857	0.334213	0.818034	0.375031	47.7295	2.10789	0.647071	3.83765	1.13524	1.45358	0.378651	0.45337
60	0.727611	0.451121	0.338057	0.817844	0.380753	47.6895	2.31034	0.647179	4.19392	1.18015	1.44797	0.38867	0.46013
62.8	0.733584	0.462211	0.34731	0.822259	0.365759	46.5375	2.01101	0.645217	3.65205	1.13587	1.45248	0.380985	0.455907
63	0.722665	0.441859	0.330621	0.815568	0.38848	48.5546	1.90395	0.652901	3.37743	1.07646	1.44213	0.378813	0.455151
65.7	0.730743	0.458978	0.344038	0.81576	0.388165	48.5968	1.77398	0.667423	3.17216	1.03192	1.40599	0.392689	0.462874
62.9	0.73086	0.456286	0.341542	0.824775	0.386075	47.6757	2.22732	0.646033	4.08955	1.17878	1.45057	0.389376	0.461743
62.2	0.735927	0.452072	0.336399	0.830913	0.390329	48.2261	2.15716	0.646943	3.96449	1.16552	1.44957	0.387743	0.461095
60.4	0.714319	0.431374	0.32233	0.809495	0.378896	47.5623	2.21607	0.650005	4.05052	1.15478	1.44122	0.387488	0.460429
62.3	0.720137	0.435185	0.32603	0.81519	0.377429	47.1628	2.23076	0.646014	4.04905	1.17886	1.45284	0.388727	0.461447
62.8	0.731444	0.45424	0.341698	0.822664	0.38142	47.6498	2.15315	0.640993	3.91434	1.17322	1.46314	0.381465	0.458187
62.1	0.73586	0.460805	0.343078	0.832814	0.38416	47.9982	2.25509	0.646507	4.12695	1.17085	1.44915	0.385207	0.459231
62.9	0.730004	0.445234	0.331947	0.833702	0.381918	48.0997	2.01845	0.645082	3.69547	1.13953	1.45268	0.380986	0.45867
58.7	0.726673	0.443851	0.331355	0.829089	0.388045	48.0787	2.08002	0.64768	3.77567	1.1405	1.45288	0.384734	0.459095
60.4	0.700312	0.423853	0.319753	0.792484	0.361859	46.152	2.36305	0.637895	4.47017	1.21994	1.46351	0.38026	0.455778
59	0.720521	0.439321	0.328692	0.809323	0.38972	48.5785	1.90659	0.666856	3.46088	1.06661	1.40541	0.402007	0.470033
60	0.724967	0.44612	0.333481	0.824699	0.38431	48.234	1.94467	0.652028	3.53578	1.10868	1.44279	0.385751	0.45992
63.3	0.715382	0.45444	0.346353	0.811161	0.374882	46.9712	2.27492	0.630081	4.29513	1.24002	1.48016	0.376544	0.45539
60.9	0.705796	0.423515	0.318211	0.810047	0.377474	47.2674	2.23286	0.635274	4.03117	1.19423	1.47224	0.374419	0.454944
61.1	0.708626	0.421418	0.316182	0.808586	0.375452	47.5161	2.13376	0.635299	3.94117	1.17621	1.47526	0.369537	0.451298
61.4	0.716527	0.443483	0.333272	0.805266	0.369322	46.6663	2.12099	0.644161	3.88708	1.16136	1.45278	0.381923	0.457006
60.7	0.708886	0.433042	0.325906	0.795975	0.370522	46.4818	2.00511	0.647434	3.64775	1.12557	1.4496	0.382116	0.457024
57.7	0.712055	0.428745	0.321017	0.805206	0.364007	46.3117	2.25374	0.637438	4.18422	1.1981	1.46627	0.376357	0.455404
66.5	0.727667	0.446207	0.333324	0.815305	0.380359	48.022	2.06451	0.654559	3.75144	1.1194	1.43495	0.388464	0.459565
66.7	0.6935	0.422557	0.320326	0.784084	0.356289	44.8557	2.25075	0.645512	4.03359	1.18225	1.45955	0.394857	0.466669
59.2	0.702127	0.420823	0.315074	0.798702	0.373434	46.4908	2.09102	0.653718	3.80007	1.13666	1.43896	0.394997	0.466745
61	0.713438	0.43267	0.322325	0.811198	0.379047	47.4541	2.21146	0.646429	4.07163	1.16496	1.45375	0.385238	0.459555
62.2	0.701798	0.425591	0.317961	0.796525	0.373456	46.9155	2.07571	0.654037	3.73102	1.12859	1.43244	0.393242	0.464211
63.5	0.708237	0.428763	0.320128	0.800242	0.370758	46.9493	2.05422	0.648474	3.80221	1.14617	1.44148	0.386455	0.459094
64.2	0.699668	0.428594	0.323446	0.785503	0.368639	46.0157	2.16883	0.653317	3.99261	1.1502	1.43741	0.395649	0.466688
60.6	0.724998	0.451492	0.341528	0.809988	0.384503	47.5357	2.26831	0.635471	4.181	1.21949	1.47384	0.383034	0.461306
62.2	0.729574	0.455943	0.343951	0.80795	0.415647	50.194	2.09836	0.650408	3.75505	1.13122	1.43989	0.38626	0.457556
57	0.737898	0.469374	0.353951	0.828946	0.37405	46.9918	1.97682	0.648686	3.64196	1.13059	1.45032	0.386847	0.462115
62.1	0.727739	0.452903	0.340135	0.821456	0.384179	48.4469	1.90914	0.659813	3.39036	1.07119	1.42646	0.38872	0.461001
64.5	0.737107	0.467048	0.351295	0.82551	0.380837	48.0011	1.99285	0.654758	3.68461	1.11171	1.43015	0.387252	0.460971
59.2	0.725348	0.451599	0.335893	0.825932	0.408248	49.95	1.74862	0.669914	3.12054	1.02763	1.40098	0.394887	0.462961
62.8	0.720396	0.453211	0.340763	0.812131	0.36737	46.7409	2.10192	0.643099	3.83897	1.15292	1.4596	0.380166	0.456581
61	0.706286	0.428935	0.32324	0.801461	0.374729	47.0584	1.99807	0.657421	3.58659	1.10271	1.42914	0.394704	0.466869
57.5	0.707279	0.424762	0.316487	0.81211	0.389318	48.4864	2.00611	0.657559	3.52095	1.10412	1.43154	0.394455	0.464371
63.4	0.70254	0.413372	0.308511	0.805368	0.381649	48.0323	2.22131	0.631799	4.01859	1.1987	1.4822	0.368786	0.449679
57.3	0.696759	0.419936	0.313792	0.793084	0.372913	47.1128	2.36553	0.633497	4.40076	1.22219	1.47638	0.372308	0.450297
61.4	0.681205	0.404546	0.303572	0.783587	0.376076	47.7436	2.14977	0.633751	3.93956	1.18519	1.47679	0.369907	0.450571
65.2	0.683927	0.417657	0.315226	0.778304	0.37616	46.917	2.26966	0.635535	4.22131	1.2178	1.47289	0.377914	0.45657
62.5	0.69165	0.404806	0.303564	0.790737	0.383969	48.1574	2.17636	0.633203	3.987	1.18592	1.48073	0.367363	0.450496
60	0.659053	0.377662	0.28861	0.760699	0.376557	47.2643	2.29024	0.628586	4.23967	1.22153	1.48368	0.366621	0.450909
60	0.669464	0.387866	0.292892	0.768103	0.375657	47.0742	2.12939	0.632234	3.99344	1.19799	1.47638	0.369313	0.450583
58.9	0.703791	0.418163	0.311079	0.803274	0.381155	47.8864	2.14794	0.639728	3.93187	1.1743	1.46549	0.377237	0.453528
59.8	0.658136	0.392796	0.296678	0.747427	0.390768	48.3368	2.2314	0.650099	4.12542	1.14811	1.44114	0.382055	0.454876
61	0.679632	0.397885	0.298729	0.786032	0.386311	48.4408	2.14848	0.638798	3.95799	1.16697	1.46761	0.370337	0.45018
59.1	0.68525	0.407316	0.306316	0.790689	0.378966	47.7576	2.07766	0.644198	3.71419	1.13962	1.45697	0.376755	0.453388
59.7	0.654157	0.382318	0.291677	0.757408	0.373892	46.9659	2.26974	0.635395	4.20762	1.20597	1.4703	0.374655	0.452834
62.4	0.653854	0.377813	0.288838	0.750022	0.355744	45.2072	2.23263	0.63975	4.10967	1.18682	1.46793	0.380417	0.456194
60.5	0.692666	0.407838	0.30433	0.796787	0.380028	47.8361	2.09658	0.647953	3.69626	1.13188	1.45234	0.383862	0.457855
58.5	0.694149	0.410637	0.307921	0.793797	0.373859	47.0926	2.22481	0.634126	4.02694	1.19788	1.47565	0.372779	0.451775
57.2	0.696466	0.40709	0.304785	0.802136	0.377781	47.8634	2.0691	0.643383	3.7663	1.14523	1.45582	0.377091	0.453077
62.2	0.726072	0.437059	0.321148	0.827531	0.399529	49.4204	1.89594	0.663938	3.37057	1.0602	1.41635	0.392508	0.462134
59.5	0.669282	0.384781	0.290655	0.78187	0.377526	47.6498	2.16549	0.631585	4.08916	1.21054	1.47812	0.371214	0.451442
58.6	0.675071	0.390731	0.295287	0.786454	0.373829	47.187	2.08234	0.639637	3.75302	1.15728	1.46466	0.375633	0.454887
62.2	0.679796	0.400484	0.300722	0.783713	0.374558	47.6331	2.02777	0.648587	3.62229	1.11323	1.44924	0.378073	0.454343
59	0.695015	0.41218	0.306317	0.799694	0.389645	48.499	1.93291	0.661602	3.42607	1.07202	1.42393	0.390303	0.460849
57.2	0.676271	0.394163	0.297247	0.776092	0.372516	47.1269	2.2474	0.629972	4.10452	1.20918	1.48649	0.366628	0.448482
57.9	0.687626	0.395315	0.293735	0.793477	0.382048	48.0951	2.00022	0.645239	3.69189	1.13493	1.44947	0.37795	0.454354
58.4	0.652985	0.375428	0.285435	0.762838	0.396951	48.2915	2.29959	0.64376	4.10757	1.1809	1.45708	0.382319	0.458859
54	0.668224	0.3835	0.28792	0.773434	0.418861	50.3751	1.87138	0.657233	3.43027	1.08855	1.42225	0.388198	0.460187
63.9	0.681107	0.419614	0.318368	0.771252	0.383926	48.689	3.07278	0.634283	5.72343	1.35701	1.46781	0.39351	0.463709
63.3	0.67883	0.415989	0.316803	0.762587	0.382418	49.1713	2.41005	0.649557	4.39474	1.20998	1.44106	0.399207	0.466867
61.3	0.656066	0.398429	0.303091	0.742013	0.376824	48.6679	2.30622	0.654666	4.21176	1.16606	1.43104	0.397536	0.466902
54.5	0.684571	0.417584	0.315539	0.777042	0.388768	50.1042	2.6008	0.650302	4.70565	1.19512	1.44406	0.393476	0.464628
59.7	0.675345	0.408788	0.312253	0.762778	0.370367	48.6178	2.58303	0.639719	4.78903	1.26274	1.45651	0.39353	0.466586
60.5	0.694277	0.418907	0.317165	0.774412	0.378373	49.6682	2.21311	0.640356	4.11011	1.18798	1.46072	0.379394	0.457109
54.4	0.68163	0.409603	0.307194	0.772543	0.3855	50.0633	2.58645	0.647627	4.90001	1.22176	1.4354	0.390681	0.462978
62.1	0.697286	0.421271	0.314433	0.790344	0.393535	50.7918	2.30346	0.656862	4.20136	1.158	1.42297	0.398665	0.467257
62.8	0.676784	0.410723	0.311336	0.763048	0.382771	49.4957	2.61816	0.645667	4.78294	1.22676	1.44496	0.391174	0.463771
61.3	0.672927	0.40405	0.302191	0.763165	0.393115	50.4205	2.63013	0.654308	4.99606	1.21298	1.41901	0.398007	0.466242
60.6	0.677589	0.417106	0.318371	0.75165	0.367701	48.3836	2.50554	0.640571	4.68959	1.23425	1.45218	0.387424	0.462716
59.2	0.703269	0.428517	0.321345	0.796445	0.396655	51.0478	2.41646	0.647393	4.43353	1.21635	1.44294	0.396728	0.465772
63.7	0.674875	0.410588	0.308436	0.768434	0.378692	49.2353	2.49489	0.645187	4.64177	1.23437	1.44322	0.397143	0.467797
60.7	0.680309	0.410038	0.305766	0.775885	0.388484	50.6614	2.46	0.652963	4.36514	1.18444	1.43762	0.398978	0.467057
69.3	0.664306	0.412069	0.313542	0.748405	0.374566	48.4111	2.64658	0.648007	4.83899	1.24067	1.44032	0.401428	0.468947
60.6	0.693021	0.425171	0.320526	0.778068	0.389903	50.2369	2.48414	0.649436	4.5865	1.20664	1.43529	0.396278	0.468018
56.4	0.715163	0.434983	0.324013	0.809196	0.402189	51.9096	2.35212	0.64207	4.30477	1.20743	1.45737	0.38678	0.460526
61.1	0.733142	0.456549	0.342816	0.816578	0.386712	50.7386	2.32738	0.639502	4.24985	1.19726	1.46659	0.380134	0.455384
64.5	0.739421	0.468288	0.351379	0.823056	0.389375	50.4037	2.56217	0.642621	4.6599	1.24437	1.45617	0.395051	0.465656
67.2	0.738191	0.470918	0.354923	0.821867	0.380282	49.6418	2.4239	0.641711	4.36058	1.21666	1.45782	0.38655	0.461009
64.1	0.72829	0.45476	0.340374	0.815539	0.402838	51.9089	2.26818	0.646169	4.11959	1.1624	1.4544	0.382877	0.457964
63.5	0.735545	0.467533	0.35168	0.814967	0.397539	51.5722	2.25831	0.651066	4.14121	1.15668	1.44007	0.389716	0.461995
60.6	0.728759	0.45623	0.342506	0.818313	0.395971	50.4523	2.67421	0.639113	4.90504	1.27443	1.46368	0.392225	0.463639
58.6	0.730592	0.45225	0.338033	0.820709	0.398723	51.0059	2.53608	0.639646	4.65776	1.25253	1.46585	0.390784	0.463334
61.3	0.717588	0.438258	0.327521	0.806534	0.387368	50.2815	2.60611	0.643433	4.8029	1.24389	1.45172	0.393166	0.4641
61.2	0.724553	0.44651	0.334759	0.812756	0.38495	49.8569	2.66444	0.639847	4.86814	1.26886	1.4595	0.392003	0.463844
65.3	0.732055	0.460103	0.346786	0.818204	0.396386	50.9406	2.7684	0.630774	5.07422	1.30436	1.4751	0.382825	0.459072
62.5	0.735979	0.465653	0.347741	0.8284	0.397439	51.1992	2.73941	0.637822	4.99604	1.26974	1.46575	0.386495	0.459497
62.5	0.735194	0.451741	0.335392	0.834269	0.398697	51.7122	2.45924	0.634462	4.56806	1.2452	1.47089	0.380143	0.458704
57.5	0.729191	0.447827	0.332359	0.825348	0.406634	51.9529	2.2975	0.647967	4.15465	1.18495	1.44939	0.39252	0.463344
53.9	0.700393	0.426854	0.32086	0.787147	0.382341	49.7859	2.99056	0.624333	5.70309	1.35815	1.48564	0.38017	0.457558
66	0.72538	0.454283	0.341034	0.806094	0.396517	51.1628	2.25298	0.652918	4.18861	1.16747	1.43189	0.396959	0.46753
60.6	0.724343	0.451204	0.33864	0.816737	0.39475	51.0324	2.42063	0.63836	4.43141	1.22648	1.46268	0.384796	0.461634
64.2	0.717371	0.460507	0.352369	0.802844	0.383865	49.6382	2.75975	0.617622	5.31603	1.36847	1.50423	0.376676	0.457217
57.8	0.702852	0.42803	0.322209	0.798819	0.389327	50.1912	2.77364	0.629865	5.07185	1.30825	1.48067	0.384468	0.460863
59.8	0.714995	0.433328	0.323094	0.808388	0.387496	50.6459	2.65214	0.627435	4.96843	1.29038	1.48269	0.374253	0.453874
61.3	0.728643	0.455167	0.341704	0.813001	0.380944	49.5942	2.48865	0.638698	4.58468	1.24674	1.465	0.388911	0.462449
61	0.711408	0.438158	0.330111	0.792759	0.384137	49.7468	2.4641	0.638366	4.52557	1.22951	1.46589	0.384702	0.459168
60.2	0.710181	0.433639	0.325686	0.797846	0.376651	49.3041	2.70106	0.625592	5.07982	1.30085	1.49162	0.375953	0.45699
63.5	0.742484	0.466278	0.348631	0.824712	0.391803	51.0525	2.13861	0.653108	3.9324	1.14666	1.4331	0.393433	0.463704
62	0.681659	0.418045	0.320292	0.762319	0.36717	47.6159	2.52524	0.638439	4.53656	1.25245	1.46893	0.393878	0.466439
62.5	0.698727	0.424803	0.319701	0.788529	0.390418	49.8631	2.56277	0.647665	4.70894	1.23694	1.44475	0.39998	0.469791
59.1	0.716888	0.441073	0.329	0.808644	0.395067	50.807	2.56561	0.641057	4.80682	1.24421	1.45442	0.387451	0.461561
61.6	0.700758	0.430621	0.323537	0.78919	0.383935	49.6738	2.56454	0.639643	4.59149	1.24529	1.46198	0.388592	0.461772
64.1	0.705342	0.432533	0.324991	0.79075	0.386164	50.173	2.62574	0.63392	4.8055	1.27015	1.47093	0.383125	0.460362
60.7	0.697791	0.432954	0.328191	0.777105	0.375818	48.7219	2.64068	0.64675	4.87283	1.23215	1.44546	0.396298	0.465972
62.2	0.719244	0.453661	0.344614	0.797235	0.37871	49.0965	2.49673	0.633029	4.67276	1.27196	1.47163	0.387223	0.463738
63.6	0.724362	0.460409	0.349594	0.80076	0.398792	51.177	2.20337	0.651915	3.93373	1.15426	1.43889	0.393798	0.464374
59.1	0.736836	0.470341	0.355475	0.820924	0.392452	50.2991	2.37986	0.646327	4.4159	1.21806	1.44727	0.396422	0.468552
58.4	0.726217	0.455623	0.340723	0.818742	0.405707	52.0886	2.35927	0.651053	4.2423	1.17189	1.43934	0.39125	0.463524
63.4	0.74065	0.472446	0.355567	0.824854	0.398914	51.4681	2.39447	0.64628	4.44166	1.20893	1.44473	0.392166	0.464747
63.5	0.728714	0.458265	0.341767	0.824185	0.414987	52.7743	2.11708	0.662138	3.79985	1.11528	1.414	0.399146	0.465754
64.1	0.714967	0.449022	0.338532	0.80065	0.379993	49.8172	2.63527	0.631333	4.87104	1.26595	1.47729	0.376258	0.453939
59.6	0.706817	0.435602	0.327517	0.797778	0.391388	50.3328	2.34503	0.659355	4.26128	1.17063	1.41799	0.406541	0.474321
59	0.706116	0.430521	0.32145	0.804403	0.40059	51.4541	2.51114	0.645936	4.50802	1.22355	1.44933	0.39342	0.462617
60.6	0.69521	0.413949	0.3095	0.793277	0.390279	50.9263	2.56176	0.625897	4.6062	1.2726	1.49166	0.371183	0.450365
57.9	0.685139	0.415276	0.31084	0.777193	0.386195	50.2062	2.81469	0.627603	5.28312	1.31519	1.48145	0.375902	0.453075
59.3	0.670833	0.395252	0.295766	0.767778	0.387994	50.5663	2.53913	0.628389	4.68576	1.27197	1.48521	0.375459	0.454047
59.1	0.668176	0.403095	0.305462	0.752931	0.384857	49.3784	2.99362	0.623272	5.65737	1.38699	1.48967	0.384165	0.460299
63.6	0.676005	0.394993	0.296998	0.766591	0.390779	50.6004	2.64361	0.628105	4.90154	1.28853	1.48272	0.375204	0.45528
62.5	0.648839	0.373814	0.285515	0.741852	0.372786	49.1611	2.42979	0.629853	4.48503	1.25292	1.47922	0.377395	0.457602
58.6	0.659606	0.385276	0.291511	0.751747	0.373496	49.09	2.36108	0.633467	4.48368	1.25822	1.46772	0.384076	0.461073
59.9	0.698985	0.414927	0.3078	0.794202	0.388815	50.8418	2.27242	0.641846	4.19778	1.20331	1.45512	0.385624	0.458924
56.1	0.651346	0.386444	0.293461	0.739582	0.380702	49.9331	2.54339	0.647607	4.68098	1.2108	1.44382	0.392537	0.462787
56.3	0.663007	0.388144	0.290878	0.765296	0.383342	50.0192	2.50259	0.635254	4.63877	1.24985	1.46887	0.379087	0.456283
56.6	0.667301	0.393909	0.296107	0.769337	0.381859	50.0292	2.47035	0.6334	4.44458	1.23632	1.47837	0.375464	0.453315
58.1	0.639514	0.370811	0.282951	0.737974	0.374582	49.1006	2.54226	0.637116	4.66386	1.25619	1.46505	0.387775	0.46261
60.3	0.641506	0.367228	0.280659	0.731806	0.36594	48.2404	2.54471	0.64205	4.64599	1.22689	1.45881	0.387932	0.461825
61.2	0.694201	0.41265	0.306433	0.791797	0.394722	51.1851	2.27782	0.642663	4.09641	1.18458	1.45657	0.382827	0.457096
57.7	0.692699	0.415301	0.311157	0.78768	0.38672	50.3539	2.47085	0.63281	4.53262	1.25517	1.47301	0.379997	0.455712
57.8	0.685835	0.40517	0.30214	0.786288	0.391875	51.2536	2.46553	0.639009	4.47838	1.22287	1.46471	0.380855	0.455625
62.2	0.719163	0.430471	0.316321	0.818228	0.410374	52.7417	2.17697	0.655119	3.9093	1.13434	1.42998	0.391341	0.462486
56.7	0.644786	0.367291	0.27864	0.751845	0.374722	49.3856	2.51961	0.632045	4.65817	1.26953	1.47012	0.38	0.457758
57.7	0.648528	0.365451	0.27662	0.759836	0.381086	50.0783	2.41033	0.639341	4.27556	1.21164	1.46344	0.381849	0.45746
58.3	0.670072	0.392279	0.292835	0.770809	0.388696	50.892	2.26371	0.64963	4.07929	1.16029	1.44136	0.387654	0.459709
60.7	0.697124	0.417365	0.310508	0.796784	0.401627	51.5553	2.40869	0.658574	4.23623	1.1664	1.4309	0.405179	0.469255
56.7	0.664741	0.388402	0.293673	0.760693	0.376245	49.6663	2.53997	0.626655	4.6185	1.27198	1.48994	0.373411	0.451946
58.6	0.677816	0.392439	0.290744	0.779857	0.386261	50.7788	2.48104	0.642784	4.62646	1.22481	1.44699	0.384676	0.459133
54.9	0.636	0.36411	0.276407	0.743473	0.381603	49.5858	2.39417	0.643804	4.31675	1.19996	1.45562	0.385594	0.460686
58.8	0.654448	0.377928	0.28353	0.760607	0.396056	51.0314	1.92716	0.654047	3.56051	1.11323	1.42711	0.390521	0.462306
59.4	0.650569	0.39533	0.301635	0.743214	0.375022	48.5926	3.82412	0.621045	7.30497	1.49585	1.49282	0.386406	0.462214
52.1	0.653497	0.392343	0.302801	0.745181	0.36985	48.0372	3.44849	0.620982	6.52867	1.45117	1.4931	0.38345	0.458659
57.2	0.619063	0.365384	0.284513	0.714807	0.361795	47.1867	3.38647	0.611749	6.51869	1.47932	1.51581	0.37705	0.456901
49	0.648202	0.384134	0.293591	0.755549	0.373199	49.237	3.17565	0.621413	6.01137	1.3866	1.49611	0.375752	0.455198
56.3	0.651911	0.385329	0.296186	0.746311	0.360853	47.5377	3.3722	0.615039	6.44927	1.47389	1.50621	0.383066	0.461031
64.2	0.663469	0.394736	0.30209	0.75144	0.362213	48.0847	3.10226	0.610477	6.02379	1.43879	1.51296	0.370946	0.45369
52.2	0.647371	0.382931	0.293059	0.743016	0.366892	47.901	3.58247	0.615571	6.85582	1.47759	1.50224	0.378059	0.457089
47.4	0.65699	0.388369	0.295132	0.754914	0.374673	48.5098	3.20907	0.624614	6.01442	1.4096	1.48682	0.386705	0.460377
50.7	0.637143	0.375255	0.28776	0.728211	0.363255	47.1971	3.31162	0.617149	6.28513	1.44687	1.50188	0.381149	0.458182
50.4	0.646461	0.378926	0.285755	0.744114	0.375011	48.8831	3.12019	0.632432	6.01358	1.37415	1.46652	0.390275	0.463939
52.2	0.641955	0.382045	0.294398	0.726261	0.350672	46.2269	3.21958	0.618942	6.20158	1.44602	1.49691	0.388132	0.465713
50.8	0.658325	0.381947	0.28784	0.764753	0.374268	49.1546	3.15276	0.624813	5.98167	1.40559	1.48219	0.38687	0.461589
44.1	0.631564	0.363716	0.277914	0.738031	0.359554	47.2149	3.48046	0.614025	6.72316	1.48652	1.50622	0.38215	0.459266
45.3	0.627122	0.353598	0.270366	0.733693	0.366	48.2645	3.47001	0.617128	6.44589	1.46833	1.50321	0.382703	0.458552
43.8	0.637008	0.374605	0.287469	0.733942	0.362163	46.5933	3.20746	0.629535	5.96097	1.40121	1.47772	0.395928	0.467672
55.1	0.673767	0.405598	0.307807	0.770051	0.370436	48.2077	3.58456	0.624454	6.65413	1.439	1.48344	0.386376	0.463486
46.7	0.685554	0.405175	0.304849	0.788178	0.38975	51.155	3.26885	0.612379	6.35495	1.4462	1.51278	0.368266	0.450695
48.1	0.696761	0.425927	0.32388	0.785767	0.376513	49.2872	3.78396	0.598033	7.27003	1.57471	1.54142	0.367209	0.450588
63.2	0.711095	0.432491	0.323694	0.803924	0.380837	49.6183	3.53712	0.616927	6.62987	1.47444	1.50396	0.383753	0.460025
55	0.708851	0.432199	0.322947	0.800208	0.368182	49.2522	3.1235	0.623687	5.87975	1.37927	1.48956	0.378057	0.455094
57.6	0.696644	0.416265	0.312949	0.789004	0.387944	51.0845	3.05953	0.61835	5.69631	1.38423	1.50251	0.372616	0.451731
48.5	0.697192	0.427856	0.324251	0.78338	0.38123	49.8692	3.18853	0.620701	5.92173	1.404	1.49637	0.379322	0.457034
56.8	0.680652	0.398586	0.300576	0.777733	0.372328	48.8727	3.55898	0.613306	6.82553	1.49488	1.50628	0.378862	0.458815
47.7	0.689408	0.40202	0.30206	0.78597	0.378469	49.6018	3.45127	0.607113	6.51805	1.49271	1.52558	0.370406	0.452697
47.8	0.661408	0.379935	0.290345	0.749618	0.363823	47.7058	3.46835	0.608816	6.59349	1.50095	1.52135	0.376646	0.457984
56.1	0.669735	0.384916	0.290748	0.760499	0.360791	48.0303	3.34723	0.613483	6.44663	1.46289	1.50428	0.376086	0.456723
52.8	0.691193	0.410577	0.31124	0.778555	0.373667	49.4341	3.29804	0.605453	6.36277	1.47341	1.52378	0.364641	0.450914
54.1	0.688368	0.412712	0.308576	0.790455	0.377584	49.3281	3.41801	0.610813	6.48505	1.48171	1.51542	0.376744	0.455521
46.1	0.694271	0.405769	0.304031	0.804048	0.378792	50.3996	3.27448	0.609146	6.3056	1.4592	1.51608	0.36767	0.451483
51.9	0.704263	0.41668	0.310289	0.810531	0.393312	51.3686	3.10706	0.624222	5.79627	1.38704	1.48811	0.381937	0.458073
49.2	0.661909	0.387366	0.294349	0.760417	0.364819	48.1403	3.70012	0.601288	7.26393	1.57069	1.52461	0.371789	0.453365
53.5	0.686775	0.403476	0.30446	0.775682	0.375339	49.8383	3.12131	0.621223	5.85357	1.37943	1.49434	0.37886	0.456965
53	0.69613	0.419396	0.316436	0.793669	0.378067	49.9542	3.37584	0.602145	6.48318	1.49032	1.53386	0.363233	0.451236
58.1	0.686034	0.424179	0.325717	0.777813	0.370025	48.3286	3.93386	0.586196	7.87108	1.6589	1.55972	0.359917	0.447497
52.2	0.667737	0.387395	0.294778	0.772362	0.376848	48.9445	3.77766	0.594029	7.25615	1.59176	1.54861	0.365173	0.451374
51.9	0.682985	0.396071	0.299285	0.780948	0.373677	49.607	3.44439	0.599465	6.68516	1.51392	1.53592	0.359923	0.448069
53.2	0.700417	0.422132	0.315896	0.793388	0.368823	48.6099	3.31498	0.617184	6.24481	1.44682	1.50574	0.380632	0.458779
53.8	0.688942	0.415601	0.314163	0.77744	0.370659	48.5908	3.34995	0.615148	6.35073	1.46094	1.5069	0.379657	0.458299
43.1	0.685712	0.40653	0.305193	0.785607	0.362149	48.0284	3.81134	0.599776	7.35176	1.55578	1.53658	0.363046	0.450103
51.4	0.706737	0.43149	0.32423	0.79675	0.375774	49.5581	3.16997	0.613933	6.11913	1.44293	1.50785	0.375678	0.455032
48.8	0.638723	0.373982	0.29322	0.729214	0.356804	45.5014	3.73047	0.613496	6.84094	1.52601	1.51367	0.392283	0.46712
51.4	0.660851	0.378832	0.290522	0.758711	0.375835	48.5747	3.37473	0.62367	6.37709	1.4337	1.48975	0.389319	0.464706
50.2	0.663475	0.383954	0.29201	0.761434	0.372804	48.5348	3.47514	0.607765	6.68598	1.51096	1.51877	0.37696	0.457518
49.4	0.652346	0.377997	0.286945	0.746315	0.363083	47.4342	3.30956	0.618734	6.15082	1.43238	1.5016	0.382153	0.458393
58.2	0.679772	0.407224	0.306184	0.772924	0.370336	48.8387	3.45961	0.618239	6.63225	1.45049	1.49553	0.377016	0.457178
55.4	0.671085	0.402196	0.307701	0.756609	0.363684	47.2968	3.33999	0.612917	6.41835	1.47306	1.51119	0.381898	0.459937
52.4	0.686669	0.416517	0.317346	0.770591	0.367824	47.5351	3.74258	0.605268	7.30174	1.57395	1.52526	0.382001	0.462112
57.5	0.703759	0.43256	0.327184	0.785144	0.385061	50.7026	2.89098	0.633062	5.43997	1.31801	1.46896	0.385607	0.45988
48.2	0.68629	0.415055	0.315398	0.773264	0.372101	48.7924	3.24046	0.606701	6.33887	1.46408	1.51749	0.364907	0.451305
50.5	0.687263	0.414006	0.314216	0.786657	0.389922	50.9904	3.51655	0.608575	6.68037	1.49451	1.52003	0.369588	0.452327
47	0.692593	0.415215	0.314378	0.783631	0.38204	49.903	3.38564	0.611414	6.51277	1.4687	1.51599	0.373426	0.45544
53	0.699273	0.424648	0.318415	0.793783	0.392993	51.7861	2.73189	0.636373	5.08954	1.27953	1.46565	0.382556	0.457215
48.5	0.664146	0.393775	0.299326	0.750679	0.355609	47.5248	3.39114	0.59917	6.50069	1.50941	1.53769	0.361088	0.44865
45	0.657358	0.379075	0.288608	0.757646	0.371372	48.3003	3.4667	0.620885	6.42647	1.45738	1.49704	0.386654	0.463751
46	0.634636	0.354537	0.269933	0.734505	0.364001	48.5758	3.54483	0.616236	6.59128	1.45637	1.50192	0.372972	0.453045
37.3	0.574586	0.307697	0.261131	0.658056	0.335151	45.3154	4.04711	0.574586	7.95324	1.69375	1.58604	0.3469	0.443341
39.5	0.57689	0.307545	0.255496	0.657399	0.335259	45.0839	3.81447	0.583329	7.45287	1.63352	1.56808	0.352225	0.443779
32.7	0.554868	0.28776	0.248666	0.630379	0.324565	44.6948	3.59615	0.588176	6.99109	1.56714	1.55928	0.350442	0.443146
30.6	0.50562	0.280243	0.250738	0.537889	0.299892	39.4634	3.72978	0.599336	7.30093	1.59317	1.53902	0.37834	0.458141
38.4	0.534988	0.28173	0.252114	0.589741	0.316203	42.2605	3.46793	0.598198	6.74357	1.5482	1.54087	0.370118	0.454374
42.8	0.525154	0.281077	0.249383	0.58814	0.31301	42.2099	3.46375	0.601596	6.65053	1.51232	1.53438	0.36741	0.454653
36.7	0.553567	0.296611	0.253395	0.626605	0.327496	44.0696	3.57672	0.592331	7.0988	1.58073	1.54912	0.360553	0.449883
38.1	0.580682	0.30417	0.252345	0.669162	0.342622	46.1985	3.52814	0.594325	6.75687	1.54275	1.54834	0.35797	0.446373
36.6	0.552048	0.299002	0.254892	0.622974	0.329608	44.4914	3.52475	0.595301	6.74549	1.53278	1.54919	0.359811	0.448011
28.9	0.489928	0.277716	0.254546	0.521552	0.288146	39.7978	4.26215	0.574423	8.63094	1.74055	1.58073	0.348162	0.442069
40.7	0.509189	0.281796	0.259385	0.553041	0.298984	40.7832	4.18514	0.576594	8.3258	1.71564	1.58335	0.35185	0.443733
42.9	0.530966	0.285647	0.25752	0.605458	0.324886	43.0394	3.88501	0.594941	7.54858	1.60372	1.54493	0.36608	0.450358
48.1	0.557072	0.30307	0.253345	0.642024	0.332309	43.7624	3.99901	0.601089	7.51913	1.57777	1.53618	0.373184	0.454512
44.1	0.603033	0.317997	0.255248	0.706015	0.357753	47.5724	3.4376	0.605597	6.48844	1.4875	1.52677	0.366264	0.449537
34	0.612249	0.33183	0.260529	0.710195	0.351801	47.0042	3.75229	0.596605	7.14299	1.56913	1.54385	0.362015	0.447589
42	0.573412	0.299742	0.253437	0.663695	0.33848	45.9677	3.83242	0.59289	7.3061	1.58245	1.55193	0.359452	0.447207
43.7	0.58987	0.302839	0.25033	0.676976	0.346953	46.7067	3.61686	0.593903	6.87952	1.54851	1.55286	0.357522	0.445457
34.1	0.465953	0.283759	0.259278	0.494318	0.283692	38.3386	4.09572	0.58086	8.11878	1.70593	1.57353	0.361867	0.451378
34.3	0.458091	0.276262	0.253613	0.47967	0.273957	37.4465	4.04301	0.580785	7.7152	1.66325	1.58191	0.359809	0.44939
43.3	0.533934	0.288262	0.256913	0.611957	0.321972	43.5251	3.53126	0.592731	6.75974	1.55192	1.55297	0.359779	0.449234
36.7	0.622541	0.342484	0.262438	0.7203	0.364091	48.0621	3.152	0.626534	5.86286	1.39037	1.48271	0.384559	0.458065
42.6	0.542271	0.288439	0.249565	0.616817	0.317301	43.3247	3.72322	0.584743	7.2778	1.60814	1.56578	0.351957	0.444665
38.1	0.560782	0.296023	0.253117	0.644302	0.333236	45.1723	4.10434	0.581956	8.22693	1.68443	1.56445	0.352656	0.444387
38.4	0.518928	0.280791	0.264509	0.586779	0.320363	43.0943	3.86374	0.589168	7.39637	1.61425	1.56025	0.359745	0.449169
40.1	0.540258	0.290055	0.259052	0.620512	0.331645	44.8306	3.28858	0.600843	6.44223	1.48925	1.5328	0.358622	0.446715
53.6	0.60246	0.386322	0.307147	0.702679	0.358032	45.7213	2.44884	0.611313	4.86013	1.31735	1.55887	0.361585	0.456028
49.3	0.621882	0.394483	0.310607	0.726797	0.358166	46.5397	2.27649	0.631401	4.35087	1.21461	1.515	0.375898	0.462248
41.9	0.572217	0.35806	0.294177	0.679158	0.340846	44.1554	2.93524	0.600391	5.69249	1.41001	1.58089	0.353018	0.449947
38.5	0.5977	0.380546	0.304379	0.714145	0.346975	45.4128	2.47743	0.607193	4.79489	1.32314	1.56899	0.358694	0.454176
45.4	0.611568	0.383201	0.305459	0.702474	0.335286	44.2937	2.42225	0.612138	4.74877	1.30289	1.55067	0.358784	0.452854
44.3	0.633576	0.402329	0.317479	0.731018	0.349965	45.5084	2.63409	0.602983	5.16923	1.37316	1.57358	0.357302	0.452364
48.8	0.619035	0.390848	0.307826	0.729174	0.354753	44.9989	2.83692	0.615741	5.52776	1.37573	1.54219	0.374566	0.459614
37.5	0.612379	0.372254	0.292871	0.718822	0.355333	45.6923	3.09068	0.619092	5.90921	1.38875	1.53502	0.380092	0.462339
45.7	0.586405	0.360072	0.290903	0.6812	0.34609	43.8901	3.13543	0.616674	5.98644	1.42362	1.54107	0.385853	0.466036
49.1	0.610248	0.378639	0.295749	0.72275	0.371949	47.0357	2.94228	0.618263	5.78132	1.38943	1.53274	0.379157	0.463181
43.1	0.596152	0.370093	0.297264	0.68309	0.344478	44.2794	3.03234	0.607036	5.93539	1.43773	1.55525	0.371104	0.45964
45.8	0.60126	0.368354	0.294811	0.715428	0.369207	46.6826	3.36144	0.597106	6.62971	1.52216	1.57675	0.365684	0.456975
40.4	0.569743	0.348693	0.281864	0.681824	0.347104	44.7563	2.92859	0.607466	5.73135	1.40788	1.55924	0.368212	0.458131
41.5	0.552558	0.336987	0.286227	0.650942	0.342535	43.8669	3.29124	0.601677	6.18374	1.4734	1.57474	0.368232	0.458227
39.5	0.584625	0.361444	0.290586	0.688038	0.34794	44.4004	2.8515	0.620476	5.41033	1.35878	1.53452	0.383393	0.464739
51.9	0.643884	0.408332	0.318978	0.755569	0.373212	47.0056	3.12842	0.619395	5.99204	1.40251	1.5299	0.38107	0.464435
46.9	0.644616	0.399879	0.312721	0.76086	0.377533	48.7214	2.17491	0.607682	4.41399	1.2883	1.56167	0.35475	0.453362
49.2	0.674161	0.430391	0.335075	0.775744	0.36747	48.0812	2.22922	0.614291	4.35891	1.26632	1.55298	0.362184	0.456374
50.2	0.67209	0.429647	0.332927	0.771346	0.369628	47.533	3.3619	0.599933	6.39161	1.47874	1.58136	0.359563	0.451284
48.5	0.668948	0.428287	0.332108	0.77164	0.358113	46.6059	2.59551	0.610357	4.8917	1.32819	1.55863	0.36144	0.452748
49	0.625861	0.389366	0.308825	0.727298	0.353335	46.4031	2.63009	0.603659	5.07699	1.3504	1.57556	0.353606	0.452157
50.5	0.641947	0.409167	0.32237	0.734845	0.357753	46.2429	3.11085	0.594627	5.96732	1.45319	1.59056	0.350435	0.449621
40.3	0.603112	0.371799	0.302095	0.689492	0.341597	43.8336	3.46235	0.583791	6.87936	1.56255	1.613	0.347302	0.446721
35.2	0.611799	0.36825	0.298015	0.696899	0.345302	44.605	3.57318	0.5807	7.01322	1.5789	1.62216	0.344088	0.447099
40.8	0.587042	0.354813	0.295483	0.660776	0.339246	42.9823	3.72506	0.590898	7.21943	1.58938	1.59676	0.365303	0.457443
36.1	0.606436	0.362314	0.294912	0.690003	0.34191	43.6703	3.78794	0.59061	7.44394	1.59919	1.59569	0.363456	0.455643
42.9	0.650704	0.40181	0.313931	0.751356	0.372225	47.6435	3.29954	0.588855	6.6066	1.5285	1.59913	0.353492	0.452508
43.9	0.63531	0.392605	0.308368	0.751907	0.378282	47.4147	3.49059	0.589153	6.93949	1.56334	1.59826	0.359292	0.453077
45.2	0.63324	0.390936	0.310371	0.759381	0.37179	47.9257	3.20828	0.588387	6.36805	1.50774	1.5989	0.349009	0.450782
43	0.661267	0.409859	0.31778	0.791331	0.389879	49.189	2.64268	0.621324	4.94831	1.31892	1.53787	0.380683	0.464179
37.5	0.608693	0.376922	0.300943	0.719424	0.357432	45.5789	3.61182	0.591012	7.2118	1.57879	1.58936	0.363211	0.455195
44.7	0.622234	0.373424	0.29596	0.717395	0.363664	46.8674	3.2018	0.597162	6.18479	1.46647	1.5812	0.358419	0.453166
47.6	0.647339	0.405375	0.319867	0.757192	0.366244	47.8002	2.36816	0.597084	4.71433	1.34075	1.58515	0.345162	0.450811
42.2	0.622328	0.392208	0.31549	0.716081	0.344772	45.7614	2.48948	0.591654	5.12924	1.398	1.59759	0.347894	0.45327
42.2	0.603161	0.368044	0.295769	0.719293	0.352565	46.5621	2.61666	0.593618	5.28904	1.39491	1.59283	0.346021	0.449947
45.4	0.637743	0.392139	0.309937	0.753375	0.360419	47.0106	2.5322	0.597316	5.08248	1.37353	1.58911	0.347287	0.451179
51.4	0.655038	0.410583	0.318047	0.758479	0.351094	46.0057	2.50913	0.614673	4.8547	1.31042	1.55276	0.364969	0.45614
45.7	0.593088	0.37064	0.297044	0.680916	0.338266	44.22	2.92876	0.601822	5.6733	1.41963	1.57216	0.358024	0.451325
39.2	0.612356	0.378679	0.298006	0.727658	0.346397	45.0662	3.10469	0.600099	6.06701	1.45541	1.57546	0.3614	0.453021
45.9	0.654652	0.410966	0.319007	0.758192	0.359964	47.0194	2.99972	0.605816	5.92825	1.42669	1.55976	0.366575	0.455819
44.6	0.528835	0.336713	0.28893	0.604541	0.322406	41.0579	3.54688	0.599568	6.65952	1.51899	1.57714	0.37496	0.459547
41.3	0.606919	0.365601	0.293578	0.714561	0.363885	45.9207	3.2378	0.6062	6.32562	1.46667	1.56058	0.371341	0.458899
40.6	0.588722	0.355581	0.291958	0.679639	0.357993	45.1744	3.91572	0.577884	7.88196	1.65752	1.61723	0.351072	0.450503
43.8	0.570564	0.344957	0.285796	0.653533	0.34848	43.7304	3.75546	0.591103	7.26201	1.59133	1.59551	0.365565	0.456561
49.7	0.626108	0.388157	0.304097	0.735344	0.370446	47.1893	3.18274	0.603162	6.22287	1.46159	1.56428	0.365422	0.457509
47.3	0.607978	0.380933	0.306542	0.702489	0.352374	44.7122	3.21111	0.600243	6.24274	1.47833	1.57997	0.371151	0.459753
43.7	0.629095	0.402208	0.323347	0.724612	0.358889	45.2799	3.5547	0.588745	7.0359	1.58192	1.60023	0.368018	0.461076
47.6	0.663359	0.423371	0.328971	0.76257	0.383188	48.3957	3.12665	0.611508	6.05531	1.40953	1.55388	0.368743	0.457004
37.7	0.608109	0.373088	0.303252	0.679055	0.335762	44.3733	2.50612	0.587378	5.15004	1.40349	1.60969	0.340162	0.448278
47.5	0.643919	0.40422	0.318171	0.75659	0.376288	48.3121	2.26824	0.612187	4.41488	1.27425	1.55927	0.360783	0.45717
41.5	0.62152	0.378813	0.302544	0.711363	0.348444	46.005	2.44734	0.604981	4.90158	1.33392	1.57181	0.354179	0.453947
47.9	0.666466	0.420727	0.326867	0.775532	0.381629	49.055	2.05011	0.630443	3.936	1.18387	1.51838	0.368218	0.457362
42.8	0.591412	0.361607	0.29573	0.660376	0.323158	43.0578	2.94323	0.596939	5.78928	1.43099	1.58924	0.355482	0.451812
39.4	0.583967	0.341565	0.284315	0.678405	0.362263	45.932	3.37286	0.590291	6.55752	1.52365	1.5982	0.353131	0.453036
35	0.55116	0.323705	0.280709	0.620322	0.342705	43.5893	3.7905	0.58137	7.33996	1.61337	1.61711	0.351605	0.449972
18.3	0.481247	0.308893	0.283184	0.514184	0.29119	38.9075	4.04064	0.552175	8.30432	1.76751	1.67694	0.329551	0.442942
31.5	0.470223	0.307214	0.28634	0.506116	0.285739	37.7465	3.90599	0.568057	7.86462	1.70916	1.64607	0.351038	0.449928
25.9	0.456954	0.299202	0.280806	0.48741	0.279329	37.2182	3.43212	0.577099	6.88646	1.59766	1.62145	0.350809	0.449045
19.6	0.41443	0.296108	0.278137	0.412343	0.258103	32.8499	3.49747	0.601884	7.08563	1.5454	1.56714	0.377567	0.458271
25	0.437104	0.304331	0.28754	0.446469	0.273535	35.458	3.46406	0.59165	6.99311	1.5749	1.5891	0.370145	0.457132
28.7	0.437859	0.301099	0.281925	0.456913	0.27356	35.9793	3.34471	0.586111	6.82026	1.5615	1.60241	0.356302	0.453149
31.6	0.460726	0.302024	0.283622	0.490232	0.283161	37.5813	3.28877	0.588296	6.67936	1.56116	1.59855	0.366705	0.457921
29.5	0.480368	0.300688	0.282837	0.52473	0.30033	39.2534	3.39904	0.587503	6.59984	1.55284	1.60573	0.36486	0.456237
27	0.465498	0.293403	0.268943	0.513937	0.297588	39.1458	3.23029	0.597686	6.25119	1.47929	1.57918	0.362694	0.45372
22.6	0.407045	0.290605	0.26958	0.394812	0.245222	32.1789	2.44661	0.601738	4.92227	1.34456	1.5766	0.349728	0.446918
27.3	0.415055	0.293656	0.274955	0.397204	0.248905	32.9053	2.66732	0.59119	5.38761	1.40922	1.5993	0.344702	0.445282
28.8	0.447806	0.294628	0.271506	0.461394	0.263607	36.2964	2.58004	0.593589	5.2062	1.38715	1.5957	0.342795	0.446283
37.3	0.472537	0.301095	0.270271	0.529138	0.288237	38.7746	2.26853	0.612157	4.3603	1.27161	1.55981	0.358655	0.453485
25.3	0.505158	0.2977	0.268911	0.564072	0.296292	40.5627	2.66711	0.591637	5.31616	1.40218	1.59844	0.343826	0.44749
24.7	0.509503	0.300984	0.272377	0.566997	0.313644	41.3209	3.48327	0.576466	6.80119	1.57966	1.62397	0.341367	0.444469
23.8	0.476204	0.301525	0.283178	0.512106	0.294609	39.043	3.91446	0.562069	7.93711	1.71549	1.65575	0.339849	0.445373
26.4	0.473378	0.291588	0.274282	0.504113	0.291452	38.955	3.50588	0.575053	6.86625	1.58724	1.63148	0.344034	0.448545
18.9	0.371727	0.288045	0.269706	0.363575	0.241478	31.2803	2.84635	0.609484	5.62587	1.3978	1.5514	0.368473	0.454034
21.5	0.384198	0.288739	0.270913	0.376691	0.243979	30.9971	3.1225	0.611575	5.97457	1.42638	1.54945	0.3786	0.457703
31.7	0.452328	0.311467	0.292142	0.475592	0.27655	36.3688	4.3241	0.558351	8.56286	1.77377	1.65951	0.33846	0.445187
32.1	0.53362	0.312081	0.283148	0.60531	0.330545	42.4282	3.61637	0.590119	7.04393	1.56847	1.59728	0.357932	0.452376
24.5	0.464796	0.305415	0.282679	0.49906	0.281205	37.1285	4.26345	0.558909	8.71763	1.77817	1.65827	0.340594	0.44699
35.1	0.470008	0.299488	0.282358	0.515273	0.292358	38.7047	3.87803	0.566409	7.99533	1.70961	1.64351	0.345992	0.447771
25.6	0.436814	0.31041	0.29189	0.445374	0.268955	35.0227	4.03617	0.572977	7.97055	1.70021	1.63408	0.358679	0.453625
26.7	0.45765	0.298707	0.27847	0.47013	0.278392	36.6053	3.6071	0.574657	7.26049	1.62417	1.62765	0.346864	0.447336
30	0.547092	0.336374	0.27812	0.653011	0.296788	44.6669	2.41556	0.62102	4.86485	1.296	1.48241	0.363402	0.447133
43.4	0.566788	0.345305	0.282668	0.676466	0.304307	45.8631	2.11058	0.630263	4.13321	1.20287	1.46831	0.362869	0.444531
39.6	0.51169	0.331446	0.284528	0.600008	0.290294	42.3554	3.40919	0.590656	6.72555	1.54545	1.5471	0.356938	0.444221
30.3	0.520388	0.312117	0.26289	0.630177	0.28218	44.262	1.99374	0.621298	3.91634	1.20327	1.48799	0.35273	0.439907
33.9	0.522807	0.341706	0.289056	0.588032	0.279644	40.9704	3.09979	0.593119	6.34215	1.50069	1.53536	0.350707	0.44013
46.2	0.57588	0.353991	0.289289	0.682561	0.300791	45.1476	2.39999	0.621615	4.71928	1.28069	1.48472	0.362909	0.447196
40.2	0.55647	0.341567	0.28179	0.66704	0.303259	44.949	2.40423	0.621692	4.67287	1.2806	1.48408	0.363937	0.446724
31.4	0.504865	0.32686	0.284965	0.575036	0.273737	39.9828	3.19331	0.598138	6.39191	1.50441	1.53314	0.365012	0.44832
36.3	0.462538	0.291485	0.259835	0.518187	0.251474	39.1421	2.03772	0.629251	4.12093	1.20779	1.46999	0.365144	0.446296
33.5	0.526238	0.335927	0.284677	0.617975	0.294538	42.762	3.09401	0.59482	6.48247	1.51042	1.53006	0.354833	0.442409
36.5	0.453171	0.289967	0.260699	0.496284	0.245128	38.2684	1.95593	0.63173	3.91517	1.17539	1.46396	0.360261	0.442748
31.4	0.499835	0.322517	0.282204	0.575759	0.276714	41.0011	3.28736	0.58979	6.49866	1.52128	1.54506	0.348676	0.439873
36	0.474888	0.302219	0.267071	0.541076	0.261127	39.5469	2.43738	0.616084	4.85566	1.31085	1.49522	0.361454	0.445526
28.7	0.441602	0.292613	0.267028	0.474032	0.248521	37.6173	2.42764	0.615269	4.59679	1.28465	1.49936	0.355682	0.441998
27.4	0.517764	0.326835	0.278937	0.582045	0.273572	40.5059	3.00585	0.606295	5.67578	1.41713	1.51677	0.36507	0.448706
37.8	0.566675	0.338665	0.277641	0.659083	0.277911	43.746	1.6368	0.651309	3.09214	1.05351	1.42743	0.371709	0.44961
47.7	0.583196	0.356792	0.291332	0.710969	0.317435	47.2411	2.46369	0.612588	4.98124	1.33008	1.50254	0.359319	0.444868
46.3	0.605573	0.366142	0.291842	0.717397	0.313985	47.6281	1.99971	0.633001	3.88844	1.17421	1.46268	0.362657	0.444102
47.8	0.576968	0.363465	0.299747	0.662271	0.30052	44.0202	3.1329	0.595488	6.22726	1.48583	1.53449	0.35179	0.440077
32.8	0.575591	0.33953	0.276361	0.668409	0.285529	44.7106	1.89641	0.62958	3.70507	1.16363	1.47014	0.358778	0.441693
38.5	0.51442	0.329811	0.283027	0.584562	0.283979	42.258	3.23388	0.586768	6.3309	1.51617	1.55752	0.345786	0.43934
40.5	0.55138	0.343921	0.287968	0.632821	0.289943	43.8176	2.93281	0.602126	5.65497	1.41292	1.52267	0.350002	0.440084
30.5	0.478903	0.298873	0.265786	0.518187	0.252153	39.2214	2.38668	0.614004	4.43202	1.27178	1.50313	0.351586	0.438598
32.3	0.483037	0.318815	0.281948	0.51125	0.260592	37.8116	3.47804	0.589799	6.34107	1.51623	1.55547	0.351381	0.438238
29.8	0.422529	0.280841	0.258261	0.442731	0.234631	36.2151	1.9056	0.641072	3.6185	1.13115	1.44635	0.367573	0.444729
29.8	0.470877	0.313733	0.281251	0.503384	0.2552	37.2885	3.22892	0.592204	6.47068	1.51137	1.54157	0.351134	0.439121
31.6	0.543377	0.321083	0.27467	0.618235	0.275385	43.1919	2.48329	0.605739	5.06159	1.34487	1.51212	0.346548	0.437787
31.1	0.544148	0.333597	0.279509	0.623285	0.289479	43.0697	2.7753	0.601494	5.33801	1.3879	1.52461	0.350084	0.439027
26.6	0.535604	0.33401	0.284666	0.599151	0.280919	42.4412	3.16118	0.588944	6.12725	1.48955	1.54535	0.341251	0.435602
39.6	0.587013	0.345618	0.277795	0.717614	0.323465	48.3147	2.05101	0.627442	3.84005	1.18377	1.47805	0.358439	0.44321
25.8	0.52799	0.334573	0.284268	0.598606	0.286438	41.9056	3.49706	0.583117	7.07418	1.57955	1.55544	0.343972	0.437498
28.6	0.507751	0.300295	0.264139	0.559236	0.261584	41.357	2.20491	0.616314	4.38264	1.26062	1.49308	0.351781	0.440153
45.1	0.577334	0.353519	0.289986	0.693776	0.308251	46.2241	2.70631	0.603732	5.0943	1.35599	1.52588	0.344979	0.438365
34.5	0.520398	0.317249	0.272919	0.57338	0.263763	41.8092	2.53717	0.604606	4.9116	1.33102	1.52205	0.343782	0.435535
42	0.523249	0.337048	0.287506	0.60483	0.294401	43.2963	3.84317	0.571623	7.51452	1.65603	1.58011	0.337804	0.435527
32.3	0.541793	0.31554	0.265156	0.651112	0.294183	45.6155	2.19535	0.613461	4.29828	1.25797	1.50429	0.347401	0.436902
44.6	0.559717	0.348947	0.286046	0.639942	0.295865	43.4852	3.12289	0.592464	6.16858	1.48944	1.54305	0.349684	0.439287
36.2	0.504267	0.320972	0.278579	0.545247	0.26581	39.796	3.04708	0.596903	6.08847	1.46227	1.53165	0.350232	0.439721
32.4	0.525166	0.311185	0.265262	0.612375	0.278109	43.1836	2.27435	0.613598	4.28629	1.25403	1.50501	0.348014	0.436452
39.8	0.545597	0.349949	0.291869	0.614303	0.291405	42.6624	3.32553	0.584716	6.45628	1.53714	1.56038	0.345328	0.437759
32.8	0.430739	0.280903	0.256781	0.466592	0.239701	37.4256	2.07326	0.633318	3.9612	1.17948	1.46154	0.365019	0.444061
33.5	0.497199	0.31997	0.278453	0.570207	0.284228	41.5938	2.95573	0.60005	6.07674	1.46123	1.52522	0.355006	0.442961
37.3	0.467666	0.301545	0.269528	0.502512	0.255956	38.4739	2.5704	0.613038	5.10085	1.33882	1.4969	0.357611	0.441982
24.3	0.444323	0.296832	0.269988	0.46522	0.247283	37.5039	2.43391	0.616256	4.51291	1.27345	1.50097	0.354075	0.440603
36.5	0.543495	0.341167	0.288221	0.622682	0.294983	43.3691	3.22225	0.590539	6.1185	1.48884	1.54715	0.346407	0.438004
37.6	0.494034	0.301451	0.262326	0.545678	0.260528	40.5653	2.03774	0.622766	3.97428	1.20641	1.48203	0.355167	0.440402
36	0.530247	0.339643	0.29018	0.583831	0.280204	40.9375	3.23102	0.588766	6.60391	1.53266	1.54408	0.349325	0.439203
43.1	0.564993	0.34254	0.284343	0.654078	0.29332	44.8659	2.03663	0.635074	3.93687	1.17041	1.45745	0.363127	0.444392
20.9	0.476017	0.315529	0.282842	0.494311	0.258337	37.6413	2.90863	0.59331	5.84071	1.45531	1.53633	0.347172	0.437523
40.8	0.582125	0.350966	0.28529	0.708287	0.315734	47.6356	2.12861	0.627582	4.04675	1.19821	1.47732	0.358006	0.442816
28.9	0.536469	0.340533	0.291216	0.590326	0.284994	41.7853	3.52474	0.579658	7.16845	1.59794	1.56747	0.342117	0.436202
34.6	0.583075	0.350196	0.28507	0.692628	0.324597	48.4406	1.92211	0.630868	3.59567	1.14944	1.47503	0.358155	0.441801
28.1	0.447536	0.305926	0.278594	0.455887	0.252079	36.6513	3.48592	0.58182	6.31943	1.52327	1.56961	0.337671	0.43406
32.6	0.464713	0.305721	0.278987	0.506035	0.267031	38.293	3.30806	0.596215	6.12569	1.47213	1.53819	0.351821	0.44201
22.4	0.386243	0.278518	0.258862	0.385982	0.232039	34.4094	2.26277	0.624631	4.12143	1.21284	1.48266	0.354555	0.438621
25.7	0.392278	0.292598	0.271113	0.390573	0.235911	33.4312	2.9791	0.597958	5.66952	1.42073	1.53138	0.344807	0.433942
24.6	0.355386	0.267107	0.254408	0.344983	0.224818	33.3203	1.82963	0.639357	3.47628	1.11647	1.44784	0.361937	0.440557
17.6	0.380366	0.28618	0.266315	0.380661	0.234805	33.0517	2.76126	0.606162	5.43243	1.38332	1.51166	0.354513	0.43776
19.9	0.363564	0.279172	0.263857	0.364778	0.225715	32.0376	1.94132	0.647567	3.77637	1.13718	1.42982	0.380074	0.453335
23.3	0.353276	0.267859	0.25345	0.350776	0.2276	32.2951	1.84581	0.645571	3.40805	1.10184	1.43707	0.371253	0.446442
22.1	0.372593	0.283434	0.263501	0.386037	0.231604	32.5055	2.56269	0.613111	4.78885	1.307	1.50547	0.354542	0.437323
23.4	0.357475	0.25981	0.246452	0.355973	0.22939	33.1658	1.75666	0.647639	3.30094	1.08094	1.43078	0.366622	0.443283
24	0.394878	0.294642	0.274249	0.384676	0.236584	33.4377	3.18769	0.589417	6.31734	1.49683	1.54652	0.343132	0.433832
21.2	0.373169	0.283633	0.270304	0.38191	0.237079	33.8473	2.2295	0.641943	4.08598	1.17541	1.44513	0.376729	0.450859
18.9	0.369533	0.282664	0.264668	0.38534	0.228393	32.4029	2.07446	0.635508	4.06403	1.1848	1.44933	0.366431	0.443773
23.6	0.346779	0.264768	0.252737	0.337151	0.232976	32.4383	1.53653	0.660256	2.88209	1.01487	1.40605	0.376221	0.449711
23.8	0.384237	0.287573	0.2701	0.392618	0.230941	33.5445	2.37497	0.622235	4.75669	1.28273	1.4793	0.362498	0.442389
24.3	0.383688	0.267515	0.251727	0.406991	0.236362	35.4773	1.66357	0.658902	3.19236	1.05143	1.4043	0.382043	0.454265
23.5	0.399784	0.283856	0.266086	0.40334	0.237988	34.4739	3.40557	0.57697	7.22481	1.60139	1.56156	0.335174	0.430546
24.5	0.390989	0.283836	0.267922	0.396817	0.241063	34.0868	2.98273	0.605926	5.99984	1.42215	1.51302	0.353419	0.438006
22.1	0.371279	0.271294	0.256521	0.352814	0.226179	33.26	2.02139	0.630731	3.90528	1.17785	1.46486	0.358667	0.43993
24.6	0.384886	0.289754	0.272006	0.366541	0.230341	32.8652	3.04688	0.602839	5.95849	1.43054	1.52124	0.35373	0.437047
22.1	0.32554	0.258383	0.246915	0.332176	0.219705	32.1718	1.37206	0.674498	2.54254	0.948565	1.3717	0.385886	0.454581
21.7	0.365239	0.28084	0.263013	0.380322	0.230756	32.1165	2.21596	0.615805	4.48489	1.26959	1.49206	0.352527	0.435746
22.9	0.370271	0.280982	0.264735	0.370499	0.22573	31.9346	2.27807	0.623956	4.44837	1.2452	1.47961	0.359542	0.440121
23.9	0.384763	0.279141	0.261773	0.380847	0.233474	33.6248	2.4754	0.605551	4.8253	1.32701	1.51828	0.345887	0.436144
19.3	0.390875	0.281999	0.25974	0.409945	0.232601	33.3949	2.96725	0.593917	6.16103	1.47242	1.53404	0.344842	0.434527
21.9	0.362117	0.26447	0.25208	0.364154	0.225462	33.3504	1.92773	0.630682	3.81114	1.16656	1.46428	0.355767	0.43914
22.7	0.36866	0.288364	0.269623	0.370338	0.230097	32.0679	2.76094	0.605288	5.34113	1.37639	1.5194	0.351998	0.43798
20.7	0.374312	0.286263	0.268602	0.371111	0.229012	32.335	2.38929	0.628704	4.54887	1.2526	1.47061	0.370044	0.44793
31.2	0.455873	0.29395	0.270825	0.524085	0.266775	39.5522	3.51028	0.621745	6.46489	1.48239	1.51724	0.410414	0.478638
29.6	0.470579	0.273403	0.244266	0.558794	0.253435	41.506	1.92898	0.641827	3.67231	1.14438	1.4739	0.379984	0.460274
24.8	0.405453	0.28715	0.268826	0.445417	0.242995	36.064	3.62391	0.610112	7.09756	1.53357	1.53082	0.391112	0.462981
26.7	0.423198	0.282821	0.263633	0.464323	0.24878	37.3279	3.30722	0.603124	6.51626	1.50347	1.55504	0.379375	0.461822
29.8	0.396044	0.274025	0.258359	0.42658	0.240042	35.571	2.4236	0.630461	4.50023	1.25307	1.49045	0.380025	0.460403
32.4	0.46001	0.296755	0.273015	0.526862	0.261137	39.6998	3.20777	0.607327	6.09691	1.4575	1.53882	0.377264	0.461028
27.3	0.442456	0.264986	0.247087	0.519442	0.250616	40.1352	1.84233	0.644085	3.60159	1.13547	1.46534	0.384987	0.463953
19.8	0.383006	0.273539	0.257334	0.411679	0.235306	33.5726	3.89584	0.600867	8.61213	1.68365	1.54721	0.396451	0.468595
23.5	0.364042	0.258684	0.246609	0.386876	0.230071	33.586	2.73006	0.631682	5.65936	1.3605	1.49082	0.40098	0.472111
23.8	0.404339	0.277261	0.263359	0.452697	0.254402	37.3805	3.25945	0.599778	6.95707	1.52837	1.5417	0.363319	0.451549
19.9	0.375357	0.270518	0.258668	0.409968	0.237064	33.2824	3.2903	0.613045	7.10161	1.51218	1.51831	0.384934	0.460279
25.6	0.381966	0.259854	0.246051	0.402269	0.230384	35.2095	2.27585	0.62289	4.42223	1.24966	1.50576	0.363759	0.44968
25.5	0.38964	0.273899	0.259012	0.416949	0.236732	34.4728	3.01131	0.619291	5.91714	1.4056	1.50891	0.385297	0.458932
18.1	0.35019	0.249313	0.238662	0.35919	0.224672	33.249	1.91642	0.643766	3.83742	1.14734	1.4537	0.378936	0.455255
23.8	0.422473	0.281045	0.265466	0.458153	0.243994	36.6531	2.85387	0.61736	5.84527	1.39524	1.50817	0.376156	0.456246
32.4	0.448071	0.283098	0.265189	0.490639	0.251277	38.2132	2.31751	0.628137	4.58442	1.26687	1.49128	0.379987	0.460967
40.2	0.491798	0.307165	0.272562	0.578629	0.289558	42.6774	3.70809	0.588556	7.82023	1.64125	1.56431	0.364979	0.454297
32.4	0.494139	0.286076	0.251887	0.571655	0.260307	42.0405	2.02717	0.617318	4.06044	1.22857	1.51122	0.354672	0.44746
27.7	0.439422	0.290114	0.267938	0.472979	0.246631	37.0093	3.60535	0.596324	7.18859	1.56998	1.55414	0.3685	0.451384
34.3	0.441945	0.282826	0.263358	0.483778	0.244894	37.0148	2.9122	0.611916	5.74376	1.40233	1.52452	0.370655	0.453357
23.3	0.383305	0.273688	0.260502	0.384338	0.232559	34.2859	2.96288	0.60328	6.02812	1.44049	1.53713	0.361743	0.449546
26.4	0.418778	0.293059	0.278151	0.440088	0.246677	36.3706	3.62568	0.603915	7.20749	1.53477	1.54042	0.370298	0.453234
18.4	0.370852	0.266931	0.255818	0.369146	0.229927	33.2757	2.25544	0.651147	4.28456	1.17635	1.43952	0.39308	0.46554
24.5	0.374784	0.278524	0.260674	0.371847	0.230517	32.759	3.32873	0.608967	6.65585	1.49077	1.52355	0.376148	0.455287
16	0.356439	0.2643	0.248271	0.366087	0.226171	32.2259	2.69814	0.628615	5.72535	1.36967	1.47943	0.390128	0.4636
15.8	0.357526	0.273844	0.261226	0.368923	0.241071	32.6698	2.72257	0.629122	5.74658	1.35505	1.47789	0.384602	0.457692
26.9	0.404153	0.294341	0.277776	0.403975	0.241441	35.0188	3.91228	0.57911	8.29818	1.68036	1.58358	0.351033	0.444317
31.2	0.412769	0.26245	0.248113	0.43857	0.242763	37.3622	2.22473	0.621962	4.37518	1.24777	1.50421	0.36434	0.450135
18	0.405611	0.28792	0.267465	0.404072	0.247151	34.6736	3.15742	0.593374	6.45179	1.50989	1.55807	0.3586	0.447274
31.1	0.486244	0.29151	0.260346	0.553396	0.275517	42.5477	2.66708	0.604205	5.18714	1.36772	1.54654	0.356387	0.448437
26.2	0.411173	0.275939	0.259499	0.433455	0.237546	36.195	2.64245	0.618562	5.37407	1.35063	1.50918	0.371619	0.453031
29.3	0.397343	0.278013	0.264477	0.402173	0.236182	34.7058	2.80037	0.610057	5.8686	1.40927	1.52138	0.365862	0.450064
34.8	0.474231	0.303319	0.278632	0.541188	0.274332	40.4344	4.12902	0.570818	8.11949	1.7015	1.60816	0.343007	0.443217
27.7	0.403647	0.267453	0.253067	0.398507	0.234684	34.7289	2.23149	0.614203	4.26737	1.25175	1.5241	0.352222	0.443914
25.1	0.40728	0.288411	0.269041	0.431617	0.246687	35.6176	3.90069	0.579621	7.90115	1.67378	1.59032	0.360368	0.44824
26.6	0.4222	0.283729	0.266679	0.452314	0.248436	36.731	3.69572	0.58999	7.47844	1.60875	1.57172	0.369007	0.454301
31.2	0.425627	0.274844	0.259189	0.456684	0.240811	37.3228	2.34327	0.62259	4.42955	1.25619	1.50858	0.366285	0.452203
19.5	0.380205	0.286047	0.269445	0.369327	0.232186	33.1687	3.0958	0.623529	5.99174	1.40168	1.49956	0.389476	0.46286
28.5	0.40097	0.265443	0.253595	0.418555	0.234151	36.2385	2.2247	0.622143	4.27894	1.23968	1.50979	0.362973	0.44854
28.7	0.403165	0.287625	0.270843	0.421586	0.242945	35.7	3.56805	0.59263	6.94408	1.55514	1.55986	0.36194	0.449426
16.8	0.341259	0.272726	0.256901	0.345338	0.233521	32.7589	2.96279	0.635122	5.61407	1.34432	1.47632	0.39842	0.466141
22.5	0.36415	0.270675	0.257374	0.379485	0.234241	35.2149	2.48346	0.629412	4.90902	1.29272	1.48968	0.384948	0.462002
19.1	0.362304	0.282062	0.267453	0.367724	0.238821	32.8741	3.26561	0.626572	6.31954	1.41914	1.49083	0.391603	0.462656
13.8	0.353324	0.265455	0.256681	0.351711	0.238215	32.8183	2.27753	0.650926	4.22746	1.17326	1.44284	0.393734	0.466204
31.2	0.422405	0.289685	0.268986	0.451267	0.251551	37.5325	3.40305	0.598057	6.7083	1.53079	1.55124	0.370737	0.455292
25	0.375621	0.275923	0.259587	0.376632	0.235975	34.5039	2.77655	0.630444	5.2465	1.31948	1.48987	0.388569	0.462487
27.6	0.396607	0.270067	0.254779	0.403508	0.23752	35.5389	2.41115	0.620576	4.71694	1.29218	1.50897	0.371353	0.455389
28.9	0.434827	0.290826	0.274441	0.471272	0.257658	38.3535	3.12939	0.608988	6.34608	1.46686	1.52998	0.37531	0.456862
13.7	0.405282	0.295965	0.272165	0.415569	0.270536	33.8887	3.29891	0.588042	6.85809	1.54788	1.57067	0.350238	0.4425
37.7	0.488093	0.289862	0.254086	0.590769	0.268976	42.7922	2.02937	0.622906	3.92616	1.20311	1.5101	0.35917	0.450819
